# Supplementary material
Source: publisher site journal article supplement (https://www.spandidos-publications.com/4309/downloadSupplementary)
Supplement: Supplementary file 1 [file downloadSupplementary]

## Sheet: Top Table PEA1_IGFBP6_Vs_PEA1
Table SI. DEGs of PEA1 IGFBP6 treated vs. PEA1 ctrl cells (P<0.05, abs logFC >0.58).
Ill_ID	Chr	Band	Symbol	Name	EntrezID	logFC	P.Value	adj.P.Val
ILMN_1669523	14	14q24.3	FOS	Fos proto-oncogene, AP-1 transcription factor subunit	2353	3.8744	2.9753e-10	5.12882e-06
ILMN_1762899	5	5q31.2	EGR1	early growth response 1	1958	2.82929	2.18193e-10	5.12882e-06
ILMN_1781285	5	5q35.1	DUSP1	dual specificity phosphatase 1	1843	2.17504	6.4376e-10	7.39809e-06
ILMN_1682636	4	4q13.3	CXCL2	C-X-C motif chemokine ligand 2	2920	1.60876	8.60513e-10	7.41676e-06
ILMN_1806023	1	1p32.1	JUN	Jun proto-oncogene, AP-1 transcription factor subunit	3725	1.45099	8.74659e-08	0.000430782
ILMN_2086077	19	19p13.13	JUNB	JunB proto-oncogene, AP-1 transcription factor subunit	3726	1.35629	3.48791e-07	0.0013361
ILMN_1682717	6	6p21.33	IER3	immediate early response 3	8870	1.35562	5.44133e-08	0.000312659
ILMN_2374865	1	1q32.3	ATF3	activating transcription factor 3	467	1.313	2.76526e-06	0.00733348
ILMN_1751607	19	19q13.32	FOSB	FosB proto-oncogene, AP-1 transcription factor subunit	2354	1.26893	5.00103e-05	0.0492616
ILMN_2184373	4	4q13.3	CXCL8	C-X-C motif chemokine ligand 8	3576	1.19862	1.38574e-07	0.000597187
ILMN_1728106	6	6p21.33	TNF	tumor necrosis factor	7124	1.13274	3.86804e-08	0.000266709
ILMN_2396020	12	12q21.33	DUSP6	dual specificity phosphatase 6	1848	1.11562	1.04924e-06	0.0032885
ILMN_1766359	1	1q21.3	GATAD2B	GATA zinc finger domain containing 2B	57459	1.08412	1.6366e-05	0.0225694
ILMN_3244960	19	19p13.13	NACC1	nucleus accumbens associated 1	112939	1.00189	0.000420473	0.148461
ILMN_1737406	10	10p15.2	KLF6	Kruppel like factor 6	1316	0.963538	0.0190213	0.459175
ILMN_1768534	3	3p26.1	BHLHE40	basic helix-loop-helix family member e40	8553	0.960792	7.30236e-07	0.00251756
ILMN_1663893	21	21q22.3	UMODL1-AS1	UMODL1 antisense RNA 1	150147	0.928631	0.0452928	0.562119
ILMN_1710284	3	3q29	HES1	hes family bHLH transcription factor 1	3280	0.891722	2.02742e-05	0.025888
ILMN_1806275	19	19p13.3	ADAT3	adenosine deaminase tRNA specific 3	113179	0.890986	2.05246e-06	0.00589671
ILMN_1720829	19	19q13.2	ZFP36	ZFP36 ring finger protein	7538	0.886371	0.000234163	0.11996
ILMN_2188862	19	19p13.11	GDF15	growth differentiation factor 15	9518	0.879883	4.12402e-06	0.0101557
ILMN_2086105	5	5q31.3	SPRY4	sprouty RTK signaling antagonist 4	81848	0.873163	3.65758e-05	0.0394058
ILMN_1750521	11	11q13.4	UCP3	uncoupling protein 3	7352	0.839083	0.00015632	0.0883492
ILMN_1781867	2	2q14.1	FOXD4L1	forkhead box D4 like 1	200350	0.819399	1.34802e-05	0.0213493
ILMN_2408179	6	6p21.33	PRRC2A	proline rich coiled-coil 2A	7916	0.802431	0.000148522	0.0862077
ILMN_1739238	X	Xq28	L1CAM	L1 cell adhesion molecule	3897	0.801312	0.000330049	0.13079
ILMN_1659936	19	19q13.33	PPP1R15A	protein phosphatase 1 regulatory subunit 15A	23645	0.799834	6.94399e-05	0.0583905
ILMN_1745021	1	1q32.3	SLC30A1	solute carrier family 30 member 1	7779	0.792899	0.00593648	0.340203
ILMN_2124802	16	16q13	MT1H	metallothionein 1H	4496	0.78182	0.00619671	0.343401
ILMN_2337492	11	11q13.2	RCE1	Ras converting CAAX endopeptidase 1	9986	0.779653	0.000137431	0.0831243
ILMN_1676984	12	12q13.3	DDIT3	DNA damage inducible transcript 3	1649	0.777364	0.000112309	0.0765409
ILMN_2121408	5	5q31.3	HBEGF	heparin binding EGF like growth factor	1839	0.776697	1.36235e-05	0.0213493
ILMN_2347249	20	20p13	RSPO4	R-spondin 4	343637	0.76896	7.44366e-05	0.0590928
ILMN_2409793	16	16p11.2	MAZ	MYC associated zinc finger protein	4150	0.764412	0.0196095	0.45959
ILMN_2411897	8	8q22.3	KLF10	Kruppel like factor 10	7071	0.758407	0.00163154	0.260906
ILMN_2271627	16	16p11.2	ATXN2L	ataxin 2 like	11273	0.755352	0.00204344	0.269374
ILMN_1711828	13	13q34	ANKRD10	ankyrin repeat domain 10	55608	0.742214	0.00140513	0.249707
ILMN_1669833	7	7q22.1	SH2B2	SH2B adaptor protein 2	10603	0.73099	0.000199198	0.104054
ILMN_2362034	12	12p11.21	BICD1	BICD cargo adaptor 1	636	0.729094	3.15594e-05	0.0376667
ILMN_1690034	4	4p15.2	SOD3	superoxide dismutase 3	6649	0.714706	0.000637704	0.190206
ILMN_1775170	16	16q13	MT1X	metallothionein 1X	4501	0.712762	0.0100667	0.392561
ILMN_1767135	2	2p22.1	SOS1	SOS Ras/Rac guanine nucleotide exchange factor 1	6654	0.71097	0.00675218	0.353782
ILMN_1703123	3	3p22.2	CSRNP1	cysteine and serine rich nuclear protein 1	64651	0.703425	1.57028e-05	0.0225571
ILMN_1733863	16	16p13.3	UBALD1	UBA like domain containing 1	124402	0.69924	0.000272897	0.127756
ILMN_1765829	17	17q11.2	NUFIP2	nuclear FMR1 interacting protein 2	57532	0.694758	0.000283953	0.127756
ILMN_1756542	19	19q13.33	TBC1D17	TBC1 domain family member 17	79735	0.690305	0.000771204	0.201354
ILMN_1788315	19	19p13.11	SIN3B	SIN3 transcription regulator family member B	23309	0.685195	4.96586e-06	0.0107002
ILMN_1730799	17	17q11.2	PHF12	PHD finger protein 12	57649	0.682095	1.26226e-05	0.0213493
ILMN_1808633	20	20p13	C20orf96	chromosome 20 open reading frame 96	140680	0.679836	0.00931771	0.387072
ILMN_1699651	7	7p15.3	IL6	interleukin 6	3569	0.679307	4.73425e-06	0.0107002
ILMN_1707600	1	1p36.11	WDTC1	WD and tetratricopeptide repeats 1	23038	0.676573	0.00982873	0.389042
ILMN_1700584	19	19p13.13	IER2	immediate early response 2	9592	0.671693	8.16129e-05	0.0611671
ILMN_1763264	6	6p21.1	MRPL2	mitochondrial ribosomal protein L2	51069	0.668818	0.0051852	0.329169
ILMN_1766593	11	11p15.5	PHRF1	PHD and ring finger domains 1	57661	0.658536	7.39665e-06	0.0150004
ILMN_1746831	19	19q13.33	ZNF114	zinc finger protein 114	163071	0.651909	3.16839e-05	0.0376667
ILMN_1712560	11	11q13.1	SF1	splicing factor 1	7536	0.651398	0.0017628	0.261959
ILMN_1787923	11	11p15.5	PNPLA2	patatin like phospholipase domain containing 2	57104	0.650447	0.00181408	0.262782
ILMN_1784822	X	Xp11.23	PPP1R3F	protein phosphatase 1 regulatory subunit 3F	89801	0.644234	0.000104868	0.0753211
ILMN_1745686	8	8p23.1	MFHAS1	malignant fibrous histiocytoma amplified sequence 1	9258	0.640549	0.0145915	0.437852
ILMN_1727200	20	20q13.33	SLCO4A1	solute carrier organic anion transporter family member 4A1	28231	0.635997	1.09622e-05	0.0209963
ILMN_1735231	19	19p13.13-p13.12	ZSWIM4	zinc finger SWIM-type containing 4	65249	0.634136	4.67787e-05	0.0474336
ILMN_2094952	1	1q32.1	NUAK2	NUAK family kinase 2	81788	0.632678	0.000137375	0.0831243
ILMN_1775171	17	17q21.2	WIPF2	WAS/WASL interacting protein family member 2	147179	0.630916	0.0218932	0.473733
ILMN_1668134	1	1p13.3	GSTM1	glutathione S-transferase mu 1	2944	0.630813	0.000109876	0.0765409
ILMN_2297353	12	12q24.11	TRPV4	transient receptor potential cation channel subfamily V member 4	59341	0.629469	0.0141924	0.437852
ILMN_2078389	7	7q36.1	SLC4A2	solute carrier family 4 member 2	6522	0.62402	0.000541069	0.177456
ILMN_1728521	12	12q13.11	HDAC7	histone deacetylase 7	51564	0.619907	0.00171451	0.260906
ILMN_3244434	4	4p14	ARAP2	ArfGAP with RhoGAP domain, ankyrin repeat and PH domain 2	116984	0.619419	0.00137094	0.249236
ILMN_1694584	22	22q11.21	CLTCL1	clathrin heavy chain like 1	8218	0.617928	5.25405e-05	0.0503162
ILMN_1809607	10	10q22.3	PPIF	peptidylprolyl isomerase F	10105	0.612813	0.000119587	0.0765409
ILMN_2089329	13	13q31.1	SPRY2	sprouty RTK signaling antagonist 2	10253	0.604749	0.000354404	0.137286
ILMN_1775327	15	15q23	PKM	pyruvate kinase M1/2	5315	0.60314	0.00722575	0.360514
ILMN_3245327	8	8p23.1	LINC00965	long intergenic non-protein coding RNA 965	349196	0.602764	0.00198857	0.269374
ILMN_2252136	17	17p13.3	YWHAE	tyrosine 3-monooxygenase/tryptophan 5-monooxygenase activation protein epsilon	7531	0.602599	0.00180273	0.262241
ILMN_1721046	12	12p13.31	PTMS	parathymosin	5763	0.602045	0.00275558	0.279689
ILMN_1716488	11	11q13.1-q13.2	PACS1	phosphofurin acidic cluster sorting protein 1	55690	0.598427	0.00400311	0.316247
ILMN_1779064	11	11q13.2	KLC2	kinesin light chain 2	64837	0.598296	0.00631608	0.343942
ILMN_1796490	8	8q24.3	GRINA	glutamate ionotropic receptor NMDA type subunit associated protein 1	2907	0.594182	0.00518628	0.329169
ILMN_1774901	16	16p11.2	GDPD3	glycerophosphodiester phosphodiesterase domain containing 3	79153	0.592869	0.00137356	0.249236
ILMN_1768181	1	1q25.2	TOR3A	torsin family 3 member A	64222	0.588219	0.00271247	0.279689
ILMN_1714600	12	12q21.2	NAV3	neuron navigator 3	89795	0.585256	5.88395e-05	0.0533829
ILMN_1693604	3	3p21.2	GRM2	glutamate metabotropic receptor 2	2912	0.582885	0.0017035	0.260906
ILMN_1668639	16	16p11.2	TBC1D10B	TBC1 domain family member 10B	26000	0.582575	0.0027118	0.279689
ILMN_1811574	16	16p13.3	MAPK8IP3	mitogen-activated protein kinase 8 interacting protein 3	23162	0.582312	0.0150778	0.442479
ILMN_1728349	6	6p21.1	TMEM63B	transmembrane protein 63B	55362	0.581934	0.00139607	0.249707
ILMN_1787897	4	4q13.3	CXCL1	C-X-C motif chemokine ligand 1	2919	0.579215	0.00172768	0.260906
ILMN_1669367	19	19q13.42	SBK3	SH3 domain binding kinase family member 3	100130827	0.577935	0.00152201	0.254099
ILMN_1810915	1	1p33	FAAH	fatty acid amide hydrolase	2166	0.576875	0.00024095	0.120391
ILMN_1770454	1	1p36.33	AGRN	agrin	375790	0.576854	5.55631e-05	0.0517728
ILMN_1778683	17	17p13.3	RTN4RL1	reticulon 4 receptor like 1	146760	0.576319	0.00547827	0.333336
ILMN_2367165	3	3q21.3	ABTB1	ankyrin repeat and BTB domain containing 1	80325	0.57473	0.000699201	0.197587
ILMN_1708934	11	11p15.4	ADM	adrenomedullin	133	0.573288	6.12768e-05	0.0539918
ILMN_1737833	12	12p13.31	ATN1	atrophin 1	1822	0.566883	0.00642866	0.344688
ILMN_2339691	11	11q13.1	SYVN1	synoviolin 1	84447	0.566335	0.000286342	0.127756
ILMN_1692785	1	1p36.31	KLHL21	kelch like family member 21	9903	0.563123	0.000780512	0.201354
ILMN_1677092	8	8q22.1	GEM	GTP binding protein overexpressed in skeletal muscle	2669	0.562893	0.00543632	0.333336
ILMN_2347193	17	17q21.1	GSDMB	gasdermin B	55876	0.559714	0.0214984	0.472089
ILMN_2075820	16	16p13.3	ZNF598	zinc finger protein 598, E3 ubiquitin ligase	90850	0.55922	0.000320332	0.129927
ILMN_2378708	7	7q22.1	TAF6	TATA-box binding protein associated factor 6	6878	0.557775	0.00744294	0.365616
ILMN_1669674	6	6p21.1	CNPY3	canopy FGF signaling regulator 3	10695	0.555691	0.0175082	0.455716
ILMN_1706645	6	6q13	CGAS	cyclic GMP-AMP synthase	115004	0.555381	0.00147955	0.251676
ILMN_1759250	6	6p21.32	TAP2	transporter 2, ATP binding cassette subfamily B member	6891	0.555327	0.0134874	0.430149
ILMN_1788349	15	15q23-q24.1	TMEM202	transmembrane protein 202	338949	0.555069	0.000150031	0.0862077
ILMN_1767643	16	16q23.1	CTRB2	chymotrypsinogen B2	440387	0.554255	0.000119887	0.0765409
ILMN_2273103	1	1q32.1	ELK4	ETS transcription factor ELK4	2005	0.55238	0.0103734	0.393183
ILMN_2292686	3	3p21.31	SLC26A6	solute carrier family 26 member 6	65010	0.550414	0.0168643	0.454864
ILMN_1733523	13	13q14.11	NAA16	N-alpha-acetyltransferase 16, NatA auxiliary subunit	79612	0.550162	0.00088024	0.208813
ILMN_2368597	1	1q25.3	SMG7	SMG7 nonsense mediated mRNA decay factor	9887	0.549208	0.000193331	0.102543
ILMN_1780334	17	17q24.3	KCNJ2	potassium inwardly rectifying channel subfamily J member 2	3759	0.548309	0.00232962	0.271337
ILMN_1774739	14	14q11.2	MMP14	matrix metallopeptidase 14	4323	0.547723	0.00464727	0.323636
ILMN_2344988	7	7q22.3	KMT2E	lysine methyltransferase 2E (inactive)	55904	0.547566	0.0218414	0.473733
ILMN_1768595	17	17p13.1	DLG4	discs large MAGUK scaffold protein 4	1742	0.547077	0.00141604	0.250133
ILMN_3235647	21	21q22.3	SIK1	salt inducible kinase 1	150094	0.545804	0.00490603	0.327953
ILMN_1772189	X	Xq28	ABCD1	ATP binding cassette subfamily D member 1	215	0.544843	0.000297581	0.127756
ILMN_1683300	19	19q13.33	BAX	BCL2 associated X, apoptosis regulator	581	0.543716	0.000883475	0.208813
ILMN_1678707	17	17q12	TAF15	TATA-box binding protein associated factor 15	8148	0.54351	0.00214431	0.269443
ILMN_1720430	20	20q13.33	PPDPF	pancreatic progenitor cell differentiation and proliferation factor	79144	0.543355	0.0450525	0.561611
ILMN_1659953	22	22q13.2	SEPTIN3	septin 3	55964	0.542544	0.0297479	0.509607
ILMN_1777444	11	11q12.3	STX5	syntaxin 5	6811	0.541626	0.00462851	0.323636
ILMN_1836776	17	17p11.2	MPRIP	myosin phosphatase Rho interacting protein	23164	0.539446	0.00618695	0.343401
ILMN_2367710	19	19p13.12	PKN1	protein kinase N1	5585	0.538314	0.00123496	0.236537
ILMN_2399523	14	14q32.33	JAG2	jagged canonical Notch ligand 2	3714	0.538005	0.00551534	0.333336
ILMN_1656501	10	10q25.2	DUSP5	dual specificity phosphatase 5	1847	0.53696	0.000284734	0.127756
ILMN_1806607	1	1p36.11	SFN	stratifin	2810	0.536847	0.00715938	0.360514
ILMN_1669404	1	1q32.1	KISS1	KiSS-1 metastasis suppressor	3814	0.536247	7.40539e-05	0.0590928
ILMN_1673073	19	19q13.12	WDR62	WD repeat domain 62	284403	0.534643	0.00294486	0.285889
ILMN_2395711	17	17p13.2	ARRB2	arrestin beta 2	409	0.532928	0.0278684	0.49898
ILMN_1654318	3	3p21.31	PTPN23	protein tyrosine phosphatase non-receptor type 23	25930	0.531052	0.00122151	0.236537
ILMN_1791728	9	9q34.11	SLC25A25	solute carrier family 25 member 25	114789	0.530784	0.000653182	0.19084
ILMN_3310151	19	19p13.3	MIR1909	microRNA 1909	100302210	0.527325	0.0248552	0.485316
ILMN_1778132	11	11q23.3	C2CD2L	C2CD2 like	9854	0.527323	0.00195383	0.269374
ILMN_3248113	19	19q13.33	SNRNP70	small nuclear ribonucleoprotein U1 subunit 70	6625	0.527303	0.000582923	0.181613
ILMN_1685810	16	16q22.1	NFATC3	nuclear factor of activated T cells 3	4775	0.527224	0.00640113	0.34434
ILMN_1862180	11	11q13.1	C11orf95	chromosome 11 open reading frame 95	65998	0.526836	0.00681384	0.35432
ILMN_1717803	2	2q35	CDK5R2	cyclin dependent kinase 5 regulatory subunit 2	8941	0.52612	0.00369216	0.306502
ILMN_1651799	12	12q13.11	SLC38A2	solute carrier family 38 member 2	54407	0.52026	0.00042201	0.148461
ILMN_1698166	21	21q21.1	C21orf91	chromosome 21 open reading frame 91	54149	0.519536	0.000999777	0.224786
ILMN_1723436	1	1q32.1	PFKFB2	6-phosphofructo-2-kinase/fructose-2,6-biphosphatase 2	5208	0.51945	0.00171045	0.260906
ILMN_3201530	1	1p35.3	XKR8	XK related 8	55113	0.519086	0.0190937	0.459175
ILMN_1694194	19	19q13.33	SCAF1	SR-related CTD associated factor 1	58506	0.518704	0.00514424	0.329169
ILMN_1806705	9	9q34.11	ASB6	ankyrin repeat and SOCS box containing 6	140459	0.518635	0.00191426	0.269372
ILMN_2347380	1	1q23.1	ARHGEF11	Rho guanine nucleotide exchange factor 11	9826	0.518576	0.00286104	0.283094
ILMN_2089340	X	Xq26.3	RTL8A	retrotransposon Gag like 8A	26071	0.517697	0.00573926	0.337721
ILMN_1743966	11	11q23.3	BCL9L	BCL9 like	283149	0.517238	0.00173505	0.260906
ILMN_1652219	20	20q11.21	NOL4L	nucleolar protein 4 like	140688	0.516159	0.000290805	0.127756
ILMN_1744381	7	7q22.1	SERPINE1	serpin family E member 1	5054	0.515483	0.00475559	0.326601
ILMN_2173611	16	16q13	MT1E	metallothionein 1E	4493	0.514336	0.0126076	0.423339
ILMN_1763640	12	12q13.12	NCKAP5L	NCK associated protein 5 like	57701	0.513232	0.00215153	0.269443
ILMN_1695759	16	16p13.3	AMDHD2	amidohydrolase domain containing 2	51005	0.512968	0.0223943	0.473733
ILMN_1709101	15	15q25.3	AKAP13	A-kinase anchoring protein 13	11214	0.511803	0.00116206	0.23622
ILMN_2361603	14	14q11.2	NDRG2	NDRG family member 2	57447	0.50988	0.0133881	0.428968
ILMN_1795918	7	7q36.1	AGAP3	ArfGAP with GTPase domain, ankyrin repeat and PH domain 3	116988	0.508817	0.00325604	0.296706
ILMN_1795247	12	12q12	ARID2	AT-rich interaction domain 2	196528	0.507907	0.00448881	0.319896
ILMN_2203891	18	18q21.1	SMAD7	SMAD family member 7	4092	0.507449	0.00174389	0.260906
ILMN_3298423	20	20q13.12	TOX2	TOX high mobility group box family member 2	84969	0.5063	0.00997887	0.391836
ILMN_1783843	1	1p36.22	MIIP	migration and invasion inhibitory protein	60672	0.505898	0.00343103	0.299694
ILMN_2334385	2	2q21.2	NCKAP5	NCK associated protein 5	344148	0.505853	0.00979361	0.389042
ILMN_1659463	12	12q23.1	APAF1	apoptotic peptidase activating factor 1	317	0.505638	0.00124289	0.23674
ILMN_1736575	19	19q13.43	TRIM28	tripartite motif containing 28	10155	0.505564	4.51213e-05	0.0471394
ILMN_1692260	17	17q25.3	MAFG	MAF bZIP transcription factor G	4097	0.504767	6.26428e-05	0.0539918
ILMN_1781001	17	17q25.3	SOCS3	suppressor of cytokine signaling 3	9021	0.504581	0.00795856	0.374835
ILMN_2378081	12	12q24.31	BCL7A	BAF chromatin remodeling complex subunit BCL7A	605	0.504305	0.00744979	0.365616
ILMN_1847965	3	3q29	RNF168	ring finger protein 168	165918	0.503264	0.0011648	0.23622
ILMN_1770085	1	1q32.1	BTG2	BTG anti-proliferation factor 2	7832	0.503089	0.0172052	0.455716
ILMN_1897310	4	4p16.3	LETM1	leucine zipper and EF-hand containing transmembrane protein 1	3954	0.501499	9.89034e-05	0.0725488
ILMN_2406439	19	19q13.2	SPTBN4	spectrin beta, non-erythrocytic 4	57731	0.501412	0.00380939	0.309746
ILMN_1690826	11	11q12.1	TNKS1BP1	tankyrase 1 binding protein 1	85456	0.501324	0.000785888	0.201354
ILMN_2188264	1	1p22.3	CCN1	cellular communication network factor 1	3491	0.500811	0.000113239	0.0765409
ILMN_1658821	19	19p13.12	SAMD1	sterile alpha motif domain containing 1	90378	0.500139	0.000385347	0.142852
ILMN_1766159	19	19p13.3	MIER2	MIER family member 2	54531	0.499039	0.00389252	0.312061
ILMN_2157544	10	10q24.32	GBF1	golgi brefeldin A resistant guanine nucleotide exchange factor 1	8729	0.498739	0.00687436	0.356841
ILMN_1661888	15	15q26.3	MEF2A	myocyte enhancer factor 2A	4205	0.498273	0.0378478	0.542482
ILMN_1670130	19	19p13.3	ARID3A	AT-rich interaction domain 3A	1820	0.497442	0.00115728	0.23622
ILMN_1671844	6	6q23.2	EYA4	EYA transcriptional coactivator and phosphatase 4	2070	0.494644	0.0173341	0.455716
ILMN_1696684	12	12p13.31	FAM90A1	family with sequence similarity 90 member A1	55138	0.494492	0.0230233	0.473733
ILMN_1688184	3	3p21.31	CSPG5	chondroitin sulfate proteoglycan 5	10675	0.493904	0.0206965	0.46519
ILMN_2090105	1	1q23.2	TAGLN2	transgelin 2	8407	0.493504	0.000727074	0.201354
ILMN_2056002	15	15q14	ANP32AP1	acidic nuclear phosphoprotein 32 family member A pseudogene 1	723972	0.493193	0.00152566	0.254099
ILMN_1665865	17	17q21.2	IGFBP4	insulin like growth factor binding protein 4	3487	0.492046	0.0146647	0.437852
ILMN_1757085	11	11q13.4	NUMA1	nuclear mitotic apparatus protein 1	4926	0.490756	0.00820017	0.376151
ILMN_1657888	16	16q12.1	SALL1	spalt like transcription factor 1	6299	0.490493	0.0026164	0.278381
ILMN_1786036	1	1q41	GPATCH2	G-patch domain containing 2	55105	0.489475	0.000878594	0.208813
ILMN_1715125	2	2p21	HAAO	3-hydroxyanthranilate 3,4-dioxygenase	23498	0.489292	0.0419893	0.553688
ILMN_2411935	16	16p13.3	KREMEN2	kringle containing transmembrane protein 2	79412	0.489056	0.021948	0.473733
ILMN_2412024	17	17q25.1	JMJD6	jumonji domain containing 6, arginine demethylase and lysine hydroxylase	23210	0.487303	0.00610036	0.342623
ILMN_2375484	4	4p15.32	CPEB2	cytoplasmic polyadenylation element binding protein 2	132864	0.487271	0.030149	0.51329
ILMN_3245564	17	17p12	ARHGAP44	Rho GTPase activating protein 44	9912	0.487028	0.00073739	0.201354
ILMN_2084836	15	15q23	CORO2B	coronin 2B	10391	0.486716	0.000375792	0.142372
ILMN_1753773	17	17q25.3	ANAPC11	anaphase promoting complex subunit 11	51529	0.486605	0.0107424	0.394414
ILMN_1668748	22	22q11.21	MED15	mediator complex subunit 15	51586	0.486586	0.00940846	0.387072
ILMN_1664233	17	17q25.3	TMC6	transmembrane channel like 6	11322	0.485221	0.0313082	0.51645
ILMN_1706410	6	6p25.3	HUS1B	HUS1 checkpoint clamp component B	135458	0.484284	0.00104881	0.22556
ILMN_1715647	1	1q23.2	VANGL2	VANGL planar cell polarity protein 2	57216	0.483776	1.29323e-05	0.0213493
ILMN_1809484	15	15q21.2	TMOD3	tropomodulin 3	29766	0.482102	0.0133524	0.428968
ILMN_1721541	12	12q14.3	WIF1	WNT inhibitory factor 1	11197	0.480786	0.00836066	0.376219
ILMN_2385866	6	6p21.32	PHF1	PHD finger protein 1	5252	0.48004	0.00231086	0.271166
ILMN_1693004	20	20q11.23	SOGA1	suppressor of glucose, autophagy associated 1	140710	0.478539	0.000748619	0.201354
ILMN_1691860	4	4q28.1	SPRY1	sprouty RTK signaling antagonist 1	10252	0.477765	0.000161971	0.0900663
ILMN_1723971	6	6p21.1	SLC29A1	solute carrier family 29 member 1 (Augustine blood group)	2030	0.477501	0.00464677	0.323636
ILMN_1682938	12	12q13.12	ARF3	ADP ribosylation factor 3	377	0.476898	0.0289484	0.503914
ILMN_1743316	12	12q24.12	PHETA1	PH domain containing endocytic trafficking adaptor 1	144717	0.476403	0.00773878	0.370559
ILMN_1776653	X	Xp22.13	SCML1	Scm polycomb group protein like 1	6322	0.476202	0.00808112	0.375649
ILMN_2385178	1	1p36.33	MIB2	mindbomb E3 ubiquitin protein ligase 2	142678	0.475846	0.00359757	0.306156
ILMN_2401436	16	16p13.3	PKMYT1	protein kinase, membrane associated tyrosine/threonine 1	9088	0.475181	0.0245205	0.483383
ILMN_1707372	1	1q42.13	RNF187	ring finger protein 187	149603	0.474585	0.0211072	0.468994
ILMN_2362847	22	22q13.31	PPARA	peroxisome proliferator activated receptor alpha	5465	0.474246	0.02834	0.503635
ILMN_1815610	11	11q13.2	SYT12	synaptotagmin 12	91683	0.474067	0.018689	0.459175
ILMN_1715332	3	3p22.2	TTC21A	tetratricopeptide repeat domain 21A	199223	0.473241	0.00479216	0.327891
ILMN_1652749	19	19q13.2	ERF	ETS2 repressor factor	2077	0.47304	0.0254333	0.486592
ILMN_2359500	1	1p34.3	NCDN	neurochondrin	23154	0.472777	0.00749472	0.365616
ILMN_1699843	19	19p13.11	CRTC1	CREB regulated transcription coactivator 1	23373	0.47265	0.0109275	0.398855
ILMN_1773849	16	16p13.3	ATP6V0C	ATPase H+ transporting V0 subunit c	527	0.472194	0.00182619	0.26343
ILMN_1778374	19	19p13.3	BSG	basigin (Ok blood group)	682	0.472138	0.00222034	0.269443
ILMN_2153547	11	11q11	OR4C15	olfactory receptor family 4 subfamily C member 15	81309	0.471971	0.0034312	0.299694
ILMN_1721575	15	15q15.1	VPS18	VPS18 core subunit of CORVET and HOPS complexes	57617	0.471866	0.00326746	0.296706
ILMN_3242377	9	9q34.3	NACC2	NACC family member 2	138151	0.471856	0.00587537	0.339761
ILMN_1736165	7	7q36.1	KMT2C	lysine methyltransferase 2C	58508	0.470935	0.0119421	0.415455
ILMN_1790228	15	15q26.1	FURIN	furin, paired basic amino acid cleaving enzyme	5045	0.470595	0.00278798	0.281872
ILMN_1771841	11	11q13.1	FOSL1	FOS like 1, AP-1 transcription factor subunit	8061	0.469992	0.0121739	0.418868
ILMN_1748241	9	9q22.31	CENPP	centromere protein P	401541	0.469777	0.0133844	0.428968
ILMN_1769702	8	8q24.3	GPAA1	glycosylphosphatidylinositol anchor attachment 1	8733	0.469721	0.00512416	0.329169
ILMN_1664176	14	14q32.12	FBLN5	fibulin 5	10516	0.469331	0.00409877	0.317908
ILMN_1696991	19	19q13.2	DYRK1B	dual specificity tyrosine phosphorylation regulated kinase 1B	9149	0.46846	0.00414548	0.317908
ILMN_1665384	1	1q44	SH3BP5L	SH3 binding domain protein 5 like	80851	0.468371	0.00806683	0.375649
ILMN_1692200	5	5q33.1	ZNF300P1	zinc finger protein 300 pseudogene 1	134466	0.467847	0.00790563	0.374388
ILMN_1788738	22	22q12.1	ZNRF3	zinc and ring finger 3	84133	0.467635	0.000905833	0.208813
ILMN_2059211	17	17q25.1	TMEM94	transmembrane protein 94	9772	0.467618	0.00178498	0.261988
ILMN_1701487	16	16p11.2	TAOK2	TAO kinase 2	9344	0.467318	0.015595	0.448417
ILMN_1801814	11	11q13.1	VEGFB	vascular endothelial growth factor B	7423	0.46653	0.0444075	0.560328
ILMN_1757532	20	20p13	SNPH	syntaphilin	9751	0.464463	0.0195043	0.459175
ILMN_1738699	17	17p13.1	FXR2	FMR1 autosomal homolog 2	9513	0.463681	0.0058655	0.339761
ILMN_3243972	2	2p15	SNORA70B	small nucleolar RNA, H/ACA box 70B	100124537	0.462646	0.0173895	0.455716
ILMN_1714952	8	8p11.23	ZNF703	zinc finger protein 703	80139	0.462155	0.00940254	0.387072
ILMN_1805466	17	17q24.3	SOX9	SRY-box transcription factor 9	6662	0.461337	0.00342159	0.299694
ILMN_2405254	17	17q12	GRB7	growth factor receptor bound protein 7	2886	0.460918	0.00223382	0.269443
ILMN_1798224	X	Xp11.22	KDM5C	lysine demethylase 5C	8242	0.460858	0.0482221	0.571111
ILMN_1757210	15	15q23	CALML4	calmodulin like 4	91860	0.460762	0.00788843	0.374388
ILMN_1685625	11	11q13.4	UCP2	uncoupling protein 2	7351	0.459877	0.00370726	0.306502
ILMN_1766221	9	9p21.1	B4GALT1	beta-1,4-galactosyltransferase 1	2683	0.459468	0.00759695	0.367339
ILMN_1669572	19	19p13.3	RNF126	ring finger protein 126	55658	0.458573	0.0104923	0.393813
ILMN_1736650	1	1p34.2-p34.1	KDM4A	lysine demethylase 4A	9682	0.457281	0.00701771	0.360033
ILMN_1666269	20	20q13.32	CTSZ	cathepsin Z	1522	0.457246	0.00040936	0.148461
ILMN_1687273	10	10q11.22	BMS1P2	BMS1 pseudogene 2	642826	0.456969	0.00492364	0.327953
ILMN_1778843	14	14q11.2	TMEM253	transmembrane protein 253	643382	0.456485	0.024269	0.483167
ILMN_1673111	19	19q13.42	TSEN34	tRNA splicing endonuclease subunit 34	79042	0.455719	0.00178567	0.261988
ILMN_3241904	1	1p36.11	MAN1C1	mannosidase alpha class 1C member 1	57134	0.453237	0.0329932	0.524665
ILMN_1657771	1	1q21.3	CRTC2	CREB regulated transcription coactivator 2	200186	0.452907	0.0315682	0.516783
ILMN_1813175	19	19p13.12	ADGRL1	adhesion G protein-coupled receptor L1	22859	0.451384	0.000236607	0.11996
ILMN_1802093	19	19q13.42	ZNF677	zinc finger protein 677	342926	0.451245	0.00178609	0.261988
ILMN_2252813	1	1q42.13	TAF5L	TATA-box binding protein associated factor 5 like	27097	0.451125	0.0314871	0.516682
ILMN_1762835	17	17q24.2	HELZ	helicase with zinc finger	9931	0.450822	0.00753028	0.365653
ILMN_1786843	16	16p11.2	KCTD13	potassium channel tetramerization domain containing 13	253980	0.450742	0.000828014	0.208813
ILMN_1763359	7	7q21.3	PEG10	paternally expressed 10	23089	0.450034	0.0366367	0.537542
ILMN_1705433	7	7q22.3	CBLL1	Cbl proto-oncogene like 1	79872	0.449679	0.00652811	0.347856
ILMN_3246830	X	Xq26.3	SMIM10L2B	small integral membrane protein 10 like 2B	644596	0.449462	0.00803213	0.375649
ILMN_1656118	19	19p13.3	ZBTB7A	zinc finger and BTB domain containing 7A	51341	0.448567	0.0163128	0.450282
ILMN_1807169	1	1p35.2	TINAGL1	tubulointerstitial nephritis antigen like 1	64129	0.448347	0.0144723	0.437852
ILMN_1773154	14	14q13.2	NFKBIA	NFKB inhibitor alpha	4792	0.448347	0.000502262	0.1665
ILMN_1690442	18	18q11.2	TMEM241	transmembrane protein 241	85019	0.446809	0.0486956	0.57122
ILMN_1744268	8	8q24.3	PLEC	plectin	5339	0.446563	0.0175351	0.455716
ILMN_1754858	2	2q37.3	PASK	PAS domain containing serine/threonine kinase	23178	0.44642	0.00203773	0.269374
ILMN_1668185	7	7q36.1	ZNF282	zinc finger protein 282	8427	0.44636	0.00441712	0.318342
ILMN_3251365	5	5q22.3	PGGT1B	protein geranylgeranyltransferase type I subunit beta	5229	0.444512	0.0104652	0.393813
ILMN_1702965	12	12p12.3	PDE6H	phosphodiesterase 6H	5149	0.444319	0.00639862	0.34434
ILMN_3237030	1	1p36.12	PLA2G2C	phospholipase A2 group IIC	391013	0.444164	0.0193435	0.459175
ILMN_1741334	12	12q13.2	IKZF4	IKAROS family zinc finger 4	64375	0.444003	0.0414588	0.552719
ILMN_1756696	19	19q13.12	USF2	upstream transcription factor 2, c-fos interacting	7392	0.443703	0.0111398	0.40144
ILMN_1688633	3	3q27.1	CLCN2	chloride voltage-gated channel 2	1181	0.442655	0.00407819	0.317908
ILMN_2350266	19	19q13.32	FBXO46	F-box protein 46	23403	0.440677	0.0138732	0.435897
ILMN_1701604	X	Xq22.3	TBC1D8B	TBC1 domain family member 8B	54885	0.440586	0.0103992	0.393445
ILMN_1678928	15	15q26.1	SLCO3A1	solute carrier organic anion transporter family member 3A1	28232	0.440164	0.000580863	0.181613
ILMN_1671911	14	14q32.33	MTA1	metastasis associated 1	9112	0.438864	0.00536126	0.333121
ILMN_1700487	17	17p11.2	TOP3A	DNA topoisomerase III alpha	7156	0.438753	0.0194335	0.459175
ILMN_3310840	17	17q23.1	MIR21	microRNA 21	406991	0.438527	0.00414433	0.317908
ILMN_1672741	21	21q22.11	ITSN1	intersectin 1	6453	0.438023	0.0188893	0.459175
ILMN_1748809	10	10q23.2	NUTM2A	NUT family member 2A	728118	0.437038	0.0217963	0.473733
ILMN_1788547	1	1p22.1	GCLM	glutamate-cysteine ligase modifier subunit	2730	0.436402	0.00291109	0.283511
ILMN_3273641	6	6p21.32	ATF6B	activating transcription factor 6 beta	1388	0.436223	0.0318671	0.518965
ILMN_2381559	9	9q33.1	ASTN2	astrotactin 2	23245	0.436031	0.000863479	0.208813
ILMN_1744665	22	22q13.2	EP300	E1A binding protein p300	2033	0.434814	0.0266398	0.491142
ILMN_2328575	21	21q22.13	CLDN14	claudin 14	23562	0.433783	0.00769172	0.369253
ILMN_1708858	22	22q13.1	CSNK1E	casein kinase 1 epsilon	1454	0.433506	0.00227118	0.270938
ILMN_1751061	16	16p11.2	C16orf54	chromosome 16 open reading frame 54	283897	0.432034	0.00417662	0.317908
ILMN_1787919	22	22q13.31	PARVB	parvin beta	29780	0.431866	0.0157307	0.449686
ILMN_1752393	10	c("10q21.3", "10q21.3-q22.1")	ATOH7	atonal bHLH transcription factor 7	220202	0.431347	0.0162837	0.450282
ILMN_1692539	22	22q13.1	SH3BP1	SH3 domain binding protein 1	23616	0.43053	0.00441391	0.318342
ILMN_1688180	17	17q25.3	ASPSCR1	ASPSCR1 tether for SLC2A4, UBX domain containing	79058	0.429836	0.0231671	0.473733
ILMN_1779010	17	17q23.3	MAP3K3	mitogen-activated protein kinase kinase kinase 3	4215	0.429138	0.00784744	0.374388
ILMN_1714170	1	1p36.22	SPSB1	splA/ryanodine receptor domain and SOCS box containing 1	80176	0.428717	0.00483144	0.327891
ILMN_1716553	15	15q23	KIF23	kinesin family member 23	9493	0.428111	0.0433323	0.557019
ILMN_1733869	7	7p13	OGDH	oxoglutarate dehydrogenase	4967	0.427914	0.000760198	0.201354
ILMN_1735608	19	19q13.2	C19orf47	chromosome 19 open reading frame 47	126526	0.427812	0.00148921	0.251676
ILMN_1716838	21	21q22.3	SPATC1L	spermatogenesis and centriole associated 1 like	84221	0.426939	0.0017934	0.261988
ILMN_1880280	3	3p13	FOXP1-IT1	FOXP1 intronic transcript 1	100506815	0.42641	0.0143743	0.437852
ILMN_3245973	17	17q21.1	MSL1	MSL complex subunit 1	339287	0.425958	0.0210175	0.468575
ILMN_1764609	10	10q26.3	PWWP2B	PWWP domain containing 2B	170394	0.425913	0.00565115	0.335386
ILMN_1656427	17	17p11.2	GID4	GID complex subunit 4 homolog	79018	0.425428	0.0143166	0.437852
ILMN_1691151	11	11q13.2	CHKA	choline kinase alpha	1119	0.425131	0.00303673	0.289211
ILMN_1706845	X	Xq12	OPHN1	oligophrenin 1	4983	0.424855	0.0456344	0.563443
ILMN_1691487	9	9q34.3	TRAF2	TNF receptor associated factor 2	7186	0.424746	0.0186951	0.459175
ILMN_1702740	1	1q32.1	IGFN1	immunoglobulin like and fibronectin type III domain containing 1	91156	0.424372	0.000295345	0.127756
ILMN_1807372	22	22q11.23	ADORA2A	adenosine A2a receptor	135	0.424176	0.00299356	0.285889
ILMN_1723048	1	1q42.13	GJC2	gap junction protein gamma 2	57165	0.423871	0.00263041	0.278381
ILMN_3236367	1	1p36.13	IFFO2	intermediate filament family orphan 2	126917	0.423813	0.000713232	0.199914
ILMN_1660839	1	1p12	LINC00622	long intergenic non-protein coding RNA 622	644242	0.423744	0.0304097	0.514877
ILMN_1779778	19	19q13.2	PRR19	proline rich 19	284338	0.423498	0.0226363	0.473733
ILMN_1655884	12	12q24.11	ATP2A2	ATPase sarcoplasmic/endoplasmic reticulum Ca2+ transporting 2	488	0.423484	0.000313853	0.128814
ILMN_1804522	17	17q23.3	CCDC47	coiled-coil domain containing 47	57003	0.423388	0.0031662	0.294522
ILMN_3268028	10	10q11.21	BMS1	BMS1 ribosome biogenesis factor	9790	0.422988	0.00331965	0.298042
ILMN_3307901	16	16q23.2	GAN	gigaxonin	8139	0.422832	0.0201347	0.462951
ILMN_1794017	19	19q13.2	SERTAD1	SERTA domain containing 1	29950	0.422	0.000956937	0.217049
ILMN_2048633	19	19p13.2	LRRC8E	leucine rich repeat containing 8 VRAC subunit E	80131	0.421749	0.0391918	0.545858
ILMN_1717434	9	9q32	WHRN	whirlin	25861	0.421193	0.0372923	0.540568
ILMN_2330307	11	11q12.1	SLC43A3	solute carrier family 43 member 3	29015	0.420439	0.00105335	0.22556
ILMN_1733616	6	6p21.1	TFEB	transcription factor EB	7942	0.420357	0.00876712	0.380695
ILMN_1677736	17	17q25.1	TMEM104	transmembrane protein 104	54868	0.419338	0.00516541	0.329169
ILMN_1751171	19	19q13.32	IRF2BP1	interferon regulatory factor 2 binding protein 1	26145	0.418568	0.00518909	0.329169
ILMN_1680251	10	10q25.1	SORCS1	sortilin related VPS10 domain containing receptor 1	114815	0.418519	0.00117841	0.23647
ILMN_1799062	10	10q24.32	NFKB2	nuclear factor kappa B subunit 2	4791	0.418308	0.00337984	0.299694
ILMN_1715968	19	19q13.12	KMT2B	lysine methyltransferase 2B	9757	0.417743	0.00120774	0.23647
ILMN_1796411	3	3q27.3	TBCCD1	TBCC domain containing 1	55171	0.416666	0.0116045	0.411453
ILMN_1704362	16	16p13.3	ZNF174	zinc finger protein 174	7727	0.416538	0.00661622	0.34922
ILMN_2328986	17	17p11.2	SREBF1	sterol regulatory element binding transcription factor 1	6720	0.415811	0.0347927	0.533355
ILMN_1733221	9	9q22.2	SEMA4D	semaphorin 4D	10507	0.415768	0.0260907	0.49046
ILMN_1659874	21	21q22.11	SCAF4	SR-related CTD associated factor 4	57466	0.415561	0.00705759	0.360514
ILMN_2394102	19	19q13.32	STRN4	striatin 4	29888	0.414728	0.0168747	0.454864
ILMN_1673566	21	21q21.3	ADAMTS1	ADAM metallopeptidase with thrombospondin type 1 motif 1	9510	0.413827	0.000576736	0.181613
ILMN_1699636	14	14q11.2	ACIN1	apoptotic chromatin condensation inducer 1	22985	0.413756	0.00272923	0.279689
ILMN_1807283	5	5q33.1	NDST1	N-deacetylase and N-sulfotransferase 1	3340	0.412581	0.0167916	0.454402
ILMN_2396947	17	17q21.2	PSMC3IP	PSMC3 interacting protein	29893	0.41256	0.0169225	0.455716
ILMN_1746579	17	17q25.1	UBE2O	ubiquitin conjugating enzyme E2 O	63893	0.411749	0.000392436	0.143932
ILMN_1748393	12	12q14.1	MARCHF9	membrane associated ring-CH-type finger 9	92979	0.411324	0.0194836	0.459175
ILMN_1746683	15	15q11.2	GOLGA8DP	golgin A8 family member D, pseudogene	100132979	0.411324	0.000669771	0.194042
ILMN_1783847	5	5q31.3	FCHSD1	FCH and double SH3 domains 1	89848	0.411003	0.0134488	0.429713
ILMN_1661337	1	1p36.22	SRM	spermidine synthase	6723	0.410775	0.00629726	0.343942
ILMN_1701025	1	1q42.12	EPHX1	epoxide hydrolase 1	2052	0.410555	0.00222436	0.269443
ILMN_1665832	20	20q11.21	ID1	inhibitor of DNA binding 1, HLH protein	3397	0.410393	0.0151976	0.444028
ILMN_3242152	3	3p21.31	LAMB2P1	laminin subunit beta 2 pseudogene 1	22973	0.410348	0.00610195	0.342623
ILMN_1704793	19	19q13.32	MYPOP	Myb related transcription factor, partner of profilin	339344	0.410323	0.00305318	0.289977
ILMN_1718990	11	11q24.3	NFRKB	nuclear factor related to kappaB binding protein	4798	0.410265	0.00389109	0.312061
ILMN_2400372	16	16p11.2	SULT1A2	sulfotransferase family 1A member 2	6799	0.410139	0.00207353	0.269374
ILMN_2192620	19	19p13.12	DCAF15	DDB1 and CUL4 associated factor 15	90379	0.409456	0.0135951	0.430796
ILMN_3180114	14	14q32.2	CCDC85C	coiled-coil domain containing 85C	317762	0.409336	0.0131874	0.427299
ILMN_3245630	5	5q31.2	ECSCR	endothelial cell surface expressed chemotaxis and apoptosis regulator	641700	0.408548	0.028513	0.503914
ILMN_1757742	10	10q26.13	ZRANB1	zinc finger RANBP2-type containing 1	54764	0.407855	0.0106814	0.394124
ILMN_1769135	9	9q34.3	DPP7	dipeptidyl peptidase 7	29952	0.407446	0.0429558	0.555548
ILMN_1721922	12	12q13.3	NAB2	NGFI-A binding protein 2	4665	0.407108	0.0127813	0.4237
ILMN_3255124	14	14q22.1	ATL1	atlastin GTPase 1	51062	0.406938	0.0156307	0.448998
ILMN_2311537	6	6p21.31	HMGA1	high mobility group AT-hook 1	3159	0.406518	0.000850185	0.208813
ILMN_1754842	20	20q11.23	DLGAP4	DLG associated protein 4	22839	0.406364	0.0106601	0.394124
ILMN_1682775	6	6p24.1	EDN1	endothelin 1	1906	0.406247	0.00593976	0.340203
ILMN_1751561	10	10p13	CAMK1D	calcium/calmodulin dependent protein kinase ID	57118	0.406034	0.0222758	0.473733
ILMN_1724148	12	12q24.31	ORAI1	ORAI calcium release-activated calcium modulator 1	84876	0.40602	0.00102659	0.225431
ILMN_1745994	17	17p13.1	GAS7	growth arrest specific 7	8522	0.406009	0.0154141	0.447697
ILMN_1765208	1	1q25.3	GLUL	glutamate-ammonia ligase	2752	0.405661	0.0320306	0.519909
ILMN_1736834	3	3q26.2	SKIL	SKI like proto-oncogene	6498	0.404772	0.01141	0.40721
ILMN_2326282	19	19p13.3	TMEM259	transmembrane protein 259	91304	0.404761	0.00343367	0.299694
ILMN_1709650	7	7p11.2	FKBP9P1	FKBP prolyl isomerase 9 pseudogene 1	360132	0.404675	0.0444836	0.560328
ILMN_1673682	19	19p13.11	GATAD2A	GATA zinc finger domain containing 2A	54815	0.404633	0.00328541	0.296706
ILMN_1657968	19	19p13.3	MAP2K2	mitogen-activated protein kinase kinase 2	5605	0.403885	0.00321705	0.294976
ILMN_1750563	9	9q34.11	CERCAM	cerebral endothelial cell adhesion molecule	51148	0.403813	0.00715249	0.360514
ILMN_1862018	17	17q21.31	ATXN7L3	ataxin 7 like 3	56970	0.403065	0.00239708	0.274844
ILMN_1700633	14	14q11.2	ABHD4	abhydrolase domain containing 4, N-acyl phospholipase B	63874	0.402772	0.0148236	0.439219
ILMN_2123730	6	6p21.2	TBC1D22B	TBC1 domain family member 22B	55633	0.40243	0.0021018	0.269374
ILMN_1776953	20	20q11.23	MYL9	myosin light chain 9	10398	0.402082	0.00751371	0.365616
ILMN_2060652	11	11p15.5	BET1L	Bet1 golgi vesicular membrane trafficking protein like	51272	0.401809	0.0213601	0.471
ILMN_1656287	10	10q22.1	SPOCK2	SPARC (osteonectin), cwcv and kazal like domains proteoglycan 2	9806	0.400726	0.0184153	0.459064
ILMN_1808306	4	4p16.3	SLC26A1	solute carrier family 26 member 1	10861	0.400564	0.0101771	0.392561
ILMN_1669645	16	16p13.3	PKD1	polycystin 1, transient receptor potential channel interacting	5310	0.40045	0.00551319	0.333336
ILMN_1691702	7	7q36.1	ZNF775	zinc finger protein 775	285971	0.399869	0.0167644	0.454023
ILMN_2211479	1	1q24.1	MAEL	maelstrom spermatogenic transposon silencer	84944	0.399841	0.0359633	0.535812
ILMN_1695280	17	17p13.3	SMG6	SMG6 nonsense mediated mRNA decay factor	23293	0.399794	0.0288248	0.503914
ILMN_2125618	X	Xp21.3	PPP4R3C	protein phosphatase 4 regulatory subunit 3C	139420	0.399576	0.0400737	0.548208
ILMN_1657627	16	16q24.3	CBFA2T3	CBFA2/RUNX1 partner transcriptional co-repressor 3	863	0.399455	0.00199184	0.269374
ILMN_1795285	5	5q31.1	JADE2	jade family PHD finger 2	23338	0.399413	0.000616165	0.18926
ILMN_1766270	11	11p15.4	OR51M1	olfactory receptor family 51 subfamily M member 1	390059	0.399322	0.0267371	0.491671
ILMN_2405991	16	16p13.3	TRAF7	TNF receptor associated factor 7	84231	0.398672	0.0246092	0.483643
ILMN_3244969	16	16p11.2	ZNF48	zinc finger protein 48	197407	0.39815	0.00832761	0.376219
ILMN_1786722	12	12q13.13	ZNF385A	zinc finger protein 385A	25946	0.398102	0.011067	0.40144
ILMN_1662370	7	7q11.21	ZNF680	zinc finger protein 680	340252	0.39772	0.00494719	0.327999
ILMN_1746349	12	12q21.31	TSPAN19	tetraspanin 19	144448	0.397654	0.00382169	0.310015
ILMN_2322458	3	3q29	OPA1	OPA1 mitochondrial dynamin like GTPase	4976	0.397459	0.00281362	0.282806
ILMN_1677098	17	17q22	YPEL2	yippee like 2	388403	0.397094	0.00486446	0.327953
ILMN_1771403	5	5q33.3	PWWP2A	PWWP domain containing 2A	114825	0.396893	0.00428185	0.317908
ILMN_1661197	11	11q13.2	CLCF1	cardiotrophin like cytokine factor 1	23529	0.39689	0.0058028	0.338506
ILMN_1797804	11	11q23.3	BACE1	beta-secretase 1	23621	0.396608	0.0190927	0.459175
ILMN_1761540	3	3p21.31	SEMA3F	semaphorin 3F	6405	0.396525	0.0283764	0.5038
ILMN_1785286	2	2p21	SOCS5	suppressor of cytokine signaling 5	9655	0.395754	0.0159905	0.449686
ILMN_1788530	13	13q34	ADPRHL1	ADP-ribosylhydrolase like 1	113622	0.395551	0.0395794	0.546472
ILMN_2381730	9	9q34.3	EGFL7	EGF like domain multiple 7	51162	0.395436	0.0466223	0.565698
ILMN_1734290	2	2p23.3	MAPRE3	microtubule associated protein RP/EB family member 3	22924	0.395428	0.0127585	0.4237
ILMN_2399328	9	9q34.3	NELFB	negative elongation factor complex member B	25920	0.395328	0.0081168	0.375997
ILMN_3245605	20	20q11.23	SNORA71A	small nucleolar RNA, H/ACA box 71A	26777	0.395312	0.0366552	0.537542
ILMN_1800172	17	17p13.3	RILP	Rab interacting lysosomal protein	83547	0.395019	0.0202153	0.462951
ILMN_1716979	1	1p13.3	GSTM4	glutathione S-transferase mu 4	2948	0.394819	0.0185944	0.459175
ILMN_1702633	2	2p11.2	RETSAT	retinol saturase	54884	0.39422	0.00307789	0.290707
ILMN_2227800	22	22q13.2	ARFGAP3	ADP ribosylation factor GTPase activating protein 3	26286	0.394131	0.0310703	0.516448
ILMN_1792415	3	3p22.1	POMGNT2	protein O-linked mannose N-acetylglucosaminyltransferase 2 (beta 1,4-)	84892	0.394119	0.00187849	0.266494
ILMN_1727107	4	4q12	REST	RE1 silencing transcription factor	5978	0.394044	0.012405	0.422223
ILMN_1796855	10	10q26.11	TIAL1	TIA1 cytotoxic granule associated RNA binding protein like 1	7073	0.393934	0.0024186	0.274844
ILMN_1799024	16	16q22.1-q22.2	VAC14	VAC14 component of PIKFYVE complex	55697	0.393877	0.0217226	0.473733
ILMN_1658806	17	17p11.2	SLC5A10	solute carrier family 5 member 10	125206	0.393532	0.048376	0.57122
ILMN_1750664	6	6p21.32	PPT2	palmitoyl-protein thioesterase 2	9374	0.393468	0.0219791	0.473733
ILMN_3237655	7	7p22.1	SLC29A4	solute carrier family 29 member 4	222962	0.393416	0.0434288	0.557094
ILMN_3237981	11	11q13.2	CARNS1	carnosine synthase 1	57571	0.393092	0.0422262	0.553688
ILMN_3237966	11	11q13.2	KDM2A	lysine demethylase 2A	22992	0.392642	0.00125603	0.237928
ILMN_2404049	20	20q13.31	RBM38	RNA binding motif protein 38	55544	0.392638	0.00143745	0.250133
ILMN_1751464	19	19p13.3	TNFSF9	TNF superfamily member 9	8744	0.392143	0.00370269	0.306502
ILMN_1699354	1	1p36.13	EPHA2	EPH receptor A2	1969	0.392052	0.00101713	0.224786
ILMN_3245066	1	1q21.3	DENND4B	DENN domain containing 4B	9909	0.392045	0.00224749	0.269443
ILMN_1652378	11	11p15.4	IPO7	importin 7	10527	0.392043	0.00199965	0.269374
ILMN_2089616	9	9p13.2	FBXO10	F-box protein 10	26267	0.391586	0.0146306	0.437852
ILMN_1768962	19	19p13.12	AKAP8L	A-kinase anchoring protein 8 like	26993	0.391217	0.0478717	0.569378
ILMN_1745784	19	19q13.43	ZNF324	zinc finger protein 324	25799	0.390879	0.000895648	0.208813
ILMN_1796013	17	17q25.3	PYCR1	pyrroline-5-carboxylate reductase 1	5831	0.39059	0.00468497	0.324335
ILMN_2405680	19	19p13.3	CRB3	crumbs cell polarity complex component 3	92359	0.390472	0.00569629	0.336853
ILMN_1658902	11	11p15.5	DEAF1	DEAF1 transcription factor	10522	0.390214	0.00430047	0.317908
ILMN_2181968	11	11q23.3	CBL	Cbl proto-oncogene	867	0.389968	0.0125578	0.423339
ILMN_2204545	11	11q24.2	ST3GAL4	ST3 beta-galactoside alpha-2,3-sialyltransferase 4	6484	0.38984	0.00622304	0.343401
ILMN_1733947	19	19p13.11	FKBP8	FKBP prolyl isomerase 8	23770	0.389716	0.0238189	0.478788
ILMN_1714223	8	8p11.23	LETM2	leucine zipper and EF-hand containing transmembrane protein 2	137994	0.388681	0.0159209	0.449686
ILMN_1657679	1	1p13.3	VAV3	vav guanine nucleotide exchange factor 3	10451	0.388316	0.00632464	0.343942
ILMN_1807737	c("X", "Y")	c("Xp22.33", "Yp11.32")	AKAP17A	A-kinase anchoring protein 17A	8227	0.388066	0.00110517	0.23092
ILMN_1716157	9	9p13.3	UBAP2	ubiquitin associated protein 2	55833	0.38795	0.00716722	0.360514
ILMN_1758542	8	8p21.3	BMP1	bone morphogenetic protein 1	649	0.387743	0.0114806	0.408469
ILMN_1699711	1	1q23.3	DEDD	death effector domain containing	9191	0.387601	0.00806135	0.375649
ILMN_1706531	3	3q27.1	ABCC5	ATP binding cassette subfamily C member 5	10057	0.387351	0.00606695	0.342083
ILMN_1791820	16	16p11.2	ZNF768	zinc finger protein 768	79724	0.387248	0.0213201	0.470965
ILMN_1799082	15	15q22.31	ZNF609	zinc finger protein 609	23060	0.386782	0.00528175	0.332288
ILMN_1707985	11	11q23.3	FOXR1	forkhead box R1	283150	0.386693	0.00505115	0.329169
ILMN_1782021	8	8q24.3	ZNF707	zinc finger protein 707	286075	0.386568	0.000552183	0.177917
ILMN_3308728	17	17q24.2	MIR635	microRNA 635	693220	0.38655	0.0228409	0.473733
ILMN_1653480	5	5q13.2	CCDC125	coiled-coil domain containing 125	202243	0.3864	0.0128601	0.424678
ILMN_3238628	11	11q24.1	BSX	brain specific homeobox	390259	0.386249	0.00808483	0.375649
ILMN_1764091	12	12q13.3	R3HDM2	R3H domain containing 2	22864	0.385946	0.026848	0.492562
ILMN_1694325	19	19p13.13	NFIX	nuclear factor I X	4784	0.385471	0.00134006	0.248995
ILMN_2166093	11	11p15.1	PIK3C2A	phosphatidylinositol-4-phosphate 3-kinase catalytic subunit type 2 alpha	5286	0.385394	0.00548495	0.333336
ILMN_1758250	12	12q24.13	TRAFD1	TRAF-type zinc finger domain containing 1	10906	0.385344	0.00597433	0.341013
ILMN_1711462	15	15q21.3	MNS1	meiosis specific nuclear structural 1	55329	0.38485	0.00243775	0.274844
ILMN_2401873	1	1q41	DUSP10	dual specificity phosphatase 10	11221	0.384787	0.011626	0.411517
ILMN_1671885	12	12p13.31	MLF2	myeloid leukemia factor 2	8079	0.384651	0.00481339	0.327891
ILMN_1703092	8	8q24.3	RECQL4	RecQ like helicase 4	9401	0.384549	0.00945501	0.387595
ILMN_1771738	2	2q23.3	ARL5A	ADP ribosylation factor like GTPase 5A	26225	0.38449	0.0216117	0.47307
ILMN_1772834	20	20q12	LPIN3	lipin 3	64900	0.384135	0.046023	0.564807
ILMN_3246957	17	17p13.1	PIK3R6	phosphoinositide-3-kinase regulatory subunit 6	146850	0.383719	0.0077008	0.369253
ILMN_1809208	19	19p13.2	CAMSAP3	calmodulin regulated spectrin associated protein family member 3	57662	0.383698	0.0169356	0.455716
ILMN_1815306	19	19q13.33	AP2A1	adaptor related protein complex 2 subunit alpha 1	160	0.383547	0.0303723	0.514806
ILMN_1778333	20	20q11.22	MMP24	matrix metallopeptidase 24	10893	0.383424	0.0256634	0.487746
ILMN_1675956	1	1q42.3	LYST	lysosomal trafficking regulator	1130	0.382858	0.0313737	0.516543
ILMN_1670640	12	12q24.31	ZNF664	zinc finger protein 664	144348	0.382265	0.0192712	0.459175
ILMN_1725946	1	1q32.2	IRF6	interferon regulatory factor 6	3664	0.381654	0.0178907	0.456982
ILMN_1815130	22	22q13.1	MICALL1	MICAL like 1	85377	0.381215	0.02299	0.473733
ILMN_1669722	7	7q36.1	LRRC61	leucine rich repeat containing 61	65999	0.381073	0.0302852	0.513835
ILMN_1685891	7	7p21.2	ETV1	ETS variant transcription factor 1	2115	0.380876	0.000742189	0.201354
ILMN_3251370	7	7p15.2	HOXA4	homeobox A4	3201	0.379834	0.00879582	0.380695
ILMN_1737005	19	19q13.31	SMG9	SMG9 nonsense mediated mRNA decay factor	56006	0.37968	0.012314	0.420752
ILMN_2075065	11	11q12.2	FADS2	fatty acid desaturase 2	9415	0.378761	0.0413751	0.552418
ILMN_1712806	7	7q22.1	AP1S1	adaptor related protein complex 1 subunit sigma 1	1174	0.378158	0.0487508	0.57122
ILMN_2346769	1	1q22	FAM189B	family with sequence similarity 189 member B	10712	0.377896	0.0227248	0.473733
ILMN_1792710	19	19p13.3	DAPK3	death associated protein kinase 3	1613	0.377848	0.00906421	0.382794
ILMN_3244286	17	17q23.2-q23.3	TANC2	tetratricopeptide repeat, ankyrin repeat and coiled-coil containing 2	26115	0.377558	0.0336714	0.528863
ILMN_1708203	4	4q31.21	OTUD4	OTU deubiquitinase 4	54726	0.377301	0.00236196	0.273258
ILMN_1789358	19	19q13.42	ZNF628	zinc finger protein 628	89887	0.377011	0.0211955	0.469926
ILMN_1723087	11	11p11.2	MDK	midkine	4192	0.376861	0.00857221	0.378892
ILMN_1809285	3	3p21.1	DCP1A	decapping mRNA 1A	55802	0.376626	0.00767434	0.36901
ILMN_1665004	17	17q21.1	CASC3	CASC3 exon junction complex subunit	22794	0.376265	0.00576339	0.337734
ILMN_1733155	17	17q11.2	GIT1	GIT ArfGAP 1	28964	0.376209	0.0084833	0.37641
ILMN_2333367	20	20p13	FKBP1A	FKBP prolyl isomerase 1A	2280	0.375661	0.0140059	0.437221
ILMN_1722045	5	5q14.1	ARSB	arylsulfatase B	411	0.375573	0.0211034	0.468994
ILMN_1783909	21	21q22.3	COL6A2	collagen type VI alpha 2 chain	1292	0.375494	0.0159238	0.449686
ILMN_1656017	7	7q32.2	NRF1	nuclear respiratory factor 1	4899	0.375452	0.0232917	0.473921
ILMN_1765326	2	2q37.1	DGKD	diacylglycerol kinase delta	8527	0.375314	0.00862399	0.379236
ILMN_1755694	8	8q24.3	LY6H	lymphocyte antigen 6 family member H	4062	0.374936	0.0231411	0.473733
ILMN_2370535	22	22q12.2	GAS2L1	growth arrest specific 2 like 1	10634	0.374901	0.0175691	0.455766
ILMN_3266851	2	2q31.1	LINC01960	long intergenic non-protein coding RNA 1960	100128905	0.37443	0.0322916	0.521934
ILMN_1794070	17	17q11.2	ANKRD13B	ankyrin repeat domain 13B	124930	0.373407	0.0114996	0.408669
ILMN_1663156	9	9q34.13	DDX31	DEAD-box helicase 31	64794	0.373264	0.00938713	0.387072
ILMN_1722089	6	6q22.31	RNF217	ring finger protein 217	154214	0.373121	0.00926637	0.387072
ILMN_1813671	22	22q11.21	SLC25A1	solute carrier family 25 member 1	6576	0.373024	0.0100927	0.392561
ILMN_1682081	1	1p35.1	RNF19B	ring finger protein 19B	127544	0.372665	0.00224622	0.269443
ILMN_2232368	20	20q13.12	PCIF1	phosphorylated CTD interacting factor 1	63935	0.372366	0.00188121	0.266494
ILMN_1665257	8	8q22.3	RIMS2	regulating synaptic membrane exocytosis 2	9699	0.372031	0.0368798	0.538387
ILMN_2415536	11	11q13.1	SIPA1	signal-induced proliferation-associated 1	6494	0.371876	0.00955914	0.387683
ILMN_1698996	21	21q22.3	SLC19A1	solute carrier family 19 member 1	6573	0.371781	0.0463608	0.565698
ILMN_1678541	20	20p13	ATRN	attractin	8455	0.370994	0.00285971	0.283094
ILMN_1684038	12	12q24.31	CLIP1	CAP-Gly domain containing linker protein 1	6249	0.370844	0.0398865	0.547641
ILMN_1747460	22	22q13.1	TMEM184B	transmembrane protein 184B	25829	0.370805	0.00196583	0.269374
ILMN_3244029	12	12q13.3	ANKRD52	ankyrin repeat domain 52	283373	0.370566	0.0255416	0.487341
ILMN_1657554	X	Xp11.22	TSPYL2	TSPY like 2	64061	0.369894	0.0188769	0.459175
ILMN_3293265	X	Xq27.2	LOC645188	uncharacterized LOC645188	645188	0.369257	0.0183476	0.459027
ILMN_1729115	19	19q13.42	UBE2S	ubiquitin conjugating enzyme E2 S	27338	0.368811	0.0207007	0.46519
ILMN_1751598	1	1p35.3	SESN2	sestrin 2	83667	0.367888	0.0431221	0.556809
ILMN_1773079	2	2q32.2	COL3A1	collagen type III alpha 1 chain	1281	0.367584	0.00718372	0.360514
ILMN_1786882	10	10q11.23	ERCC6	ERCC excision repair 6, chromatin remodeling factor	2074	0.367508	0.0120989	0.417541
ILMN_2084059	16	16q22.1	SLC12A4	solute carrier family 12 member 4	6560	0.367121	0.0235744	0.477083
ILMN_1734205	3	3p21.31	RASSF1	Ras association domain family member 1	11186	0.367106	0.0141166	0.437852
ILMN_1668027	3	3q13.33	NDUFB4	NADH:ubiquinone oxidoreductase subunit B4	4710	0.366985	0.0191383	0.459175
ILMN_2208903	1	1p36.11	CD52	CD52 molecule	1043	0.366219	0.00519398	0.329169
ILMN_1687978	12	12q21.2	PHLDA1	pleckstrin homology like domain family A member 1	22822	0.366204	0.000902942	0.208813
ILMN_1677085	20	20q13.33	RGS19	regulator of G protein signaling 19	10287	0.365584	0.00168779	0.260906
ILMN_1679158	X	Xp11.21	FAAH2	fatty acid amide hydrolase 2	158584	0.365555	0.0277186	0.497982
ILMN_1889752	6	6p24.2	SMIM13	small integral membrane protein 13	221710	0.36526	0.00518428	0.329169
ILMN_2198893	7	7q32.1	LOC407835	mitogen-activated protein kinase kinase 2 pseudogene	407835	0.365238	0.00512508	0.329169
ILMN_1692706	13	13q34	DCUN1D2	defective in cullin neddylation 1 domain containing 2	55208	0.364766	0.0274023	0.496036
ILMN_2405129	19	19q13.2	ARHGEF1	Rho guanine nucleotide exchange factor 1	9138	0.364612	0.00193734	0.269374
ILMN_2186061	10	10p15.1	PFKFB3	6-phosphofructo-2-kinase/fructose-2,6-biphosphatase 3	5209	0.364397	0.0112007	0.402236
ILMN_1758717	17	17q11.2	SUPT6H	SPT6 homolog, histone chaperone and transcription elongation factor	6830	0.364377	0.00751242	0.365616
ILMN_1769869	1	1q21.3	PIP5K1A	phosphatidylinositol-4-phosphate 5-kinase type 1 alpha	8394	0.364265	0.00347634	0.300925
ILMN_1716957	17	17q21.31	C1QL1	complement C1q like 1	10882	0.364115	0.0416422	0.553688
ILMN_1704101	16	16q22.1	HSF4	heat shock transcription factor 4	3299	0.363964	0.00187569	0.266494
ILMN_1714252	17	17p13.1	SLC16A13	solute carrier family 16 member 13	201232	0.363817	0.00298161	0.285889
ILMN_1805863	17	17p13.3	WDR81	WD repeat domain 81	124997	0.363403	0.0259313	0.48918
ILMN_1652006	X	Xp11.22	SMC1A	structural maintenance of chromosomes 1A	8243	0.363339	0.0145932	0.437852
ILMN_1763390	5	5q11.1	ISL1	ISL LIM homeobox 1	3670	0.363277	0.0066246	0.34922
ILMN_1680494	11	11q12.2	CPSF7	cleavage and polyadenylation specific factor 7	79869	0.362957	0.0156651	0.448998
ILMN_1685663	20	20q13.2	CYP24A1	cytochrome P450 family 24 subfamily A member 1	1591	0.362782	0.00512701	0.329169
ILMN_1788629	17	17q24.1	CEP112	centrosomal protein 112	201134	0.36268	0.000266224	0.127756
ILMN_1693717	17	17p13.3	RPH3AL	rabphilin 3A like (without C2 domains)	9501	0.362399	0.0443599	0.560328
ILMN_2220184	2	2p13.3	GFPT1	glutamine--fructose-6-phosphate transaminase 1	2673	0.362262	0.00214446	0.269443
ILMN_3244162	19	19q13.33	KASH5	KASH domain containing 5	147872	0.362191	0.0136438	0.43194
ILMN_1706590	19	19p13.3	MLLT1	MLLT1 super elongation complex subunit	4298	0.362121	0.0232359	0.473733
ILMN_1654630	5	5q35.3	FAM193B	family with sequence similarity 193 member B	54540	0.362029	0.0173666	0.455716
ILMN_1715416	9	9q34.11	NUP188	nucleoporin 188	23511	0.361869	0.00434084	0.317908
ILMN_1788650	14	14q23.2	GPHB5	glycoprotein hormone subunit beta 5	122876	0.360876	0.0351568	0.533735
ILMN_1697764	16	16q22.2	HYDIN	HYDIN axonemal central pair apparatus protein	54768	0.360401	0.0119816	0.415906
ILMN_2083559	7	7p22.1	AP5Z1	adaptor related protein complex 5 subunit zeta 1	9907	0.360361	0.028732	0.503914
ILMN_3262345	8	8q24.3	MROH1	maestro heat like repeat family member 1	727957	0.360219	0.0327683	0.524302
ILMN_1705984	2	2q22.1	HNMT	histamine N-methyltransferase	3176	0.360106	0.0274899	0.49646
ILMN_1674648	10	10p15.1	LINC00705	long intergenic non-protein coding RNA 705	338588	0.359831	0.000779602	0.201354
ILMN_1728218	8	8p12	RBPMS	RNA binding protein, mRNA processing factor	11030	0.35944	0.00387996	0.312061
ILMN_1656822	19	19p13.2	DNM2	dynamin 2	1785	0.359049	0.0236066	0.477083
ILMN_1805792	5	5p15.2	TRIO	trio Rho guanine nucleotide exchange factor	7204	0.358664	0.00318853	0.294522
ILMN_1783610	10	10q23.33	HELLS	helicase, lymphoid specific	3070	0.358172	0.0160071	0.449686
ILMN_1665510	1	1p36.23	ERRFI1	ERBB receptor feedback inhibitor 1	54206	0.358156	0.02378	0.478788
ILMN_1685122	1	1p34.2	COL9A2	collagen type IX alpha 2 chain	1298	0.357841	0.0337927	0.530042
ILMN_1657550	16	16q24.2	MVD	mevalonate diphosphate decarboxylase	4597	0.356884	0.00513803	0.329169
ILMN_3233135	10	10q24.31	SLF2	SMC5-SMC6 complex localization factor 2	55719	0.356329	0.00134334	0.248995
ILMN_1801700	19	19q13.12	ZNF461	zinc finger protein 461	92283	0.356274	0.0181043	0.456982
ILMN_2053921	1	1p36.13	CAPZB	capping actin protein of muscle Z-line subunit beta	832	0.355609	0.00225083	0.269443
ILMN_1704571	10	10q26.13	FAM53B	family with sequence similarity 53 member B	9679	0.355545	0.00222528	0.269443
ILMN_2371169	7	7q34	ZYX	zyxin	7791	0.355521	0.00954416	0.387649
ILMN_2305416	5	5q31.3	PCDHGA5	protocadherin gamma subfamily A, 5	56110	0.355386	0.0439161	0.559104
ILMN_1789955	6	6q15	PNRC1	proline rich nuclear receptor coactivator 1	10957	0.355013	0.0349739	0.533735
ILMN_1708946	16	16q22.1	VPS4A	vacuolar protein sorting 4 homolog A	27183	0.354819	0.005263	0.331713
ILMN_1653829	15	15q15.1	C15orf62	chromosome 15 open reading frame 62	643338	0.354695	0.0107242	0.394414
ILMN_2082244	7	7p22.1	FOXK1	forkhead box K1	221937	0.354569	0.00874041	0.380695
ILMN_1765371	16	16p13.3	LUC7L	LUC7 like	55692	0.354379	0.0204447	0.463996
ILMN_1763634	1	1p36.22	PEX14	peroxisomal biogenesis factor 14	5195	0.353676	0.0190973	0.459175
ILMN_3245236	16	16p11.2	FBRS	fibrosin	64319	0.353391	0.00451786	0.320489
ILMN_1809601	16	16p13.3	WFIKKN1	WAP, follistatin/kazal, immunoglobulin, kunitz and netrin domain containing 1	117166	0.352749	0.00395999	0.314573
ILMN_1728645	20	20q13.33	STMN3	stathmin 3	50861	0.352627	0.0387862	0.545858
ILMN_1660797	8	8p23.1	FAM90A25P	family with sequence similarity 90 member A25, pseudogene	389633	0.352624	0.0347877	0.533355
ILMN_1769532	8	8p23.1	FAM86B1	family with sequence similarity 86 member B1	85002	0.352554	0.0347633	0.533355
ILMN_2179873	3	3q26.2	PHC3	polyhomeotic homolog 3	80012	0.352448	0.0403074	0.548613
ILMN_1760628	9	9q34.3	RABL6	RAB, member RAS oncogene family like 6	55684	0.352412	0.0206379	0.464996
ILMN_3244521	11	11p13	LINC00294	long intergenic non-protein coding RNA 294	283267	0.352377	0.00836108	0.376219
ILMN_2091375	2	2p11.2	KRCC1	lysine rich coiled-coil 1	51315	0.352084	0.0250898	0.486041
ILMN_1670752	1	1q22	KHDC4	KH domain containing 4, pre-mRNA splicing factor	22889	0.35205	0.00877661	0.380695
ILMN_1777963	1	1q24.2	CCDC181	coiled-coil domain containing 181	57821	0.351829	0.0410704	0.551722
ILMN_1692731	7	7p22.3	TTYH3	tweety family member 3	80727	0.351665	0.0268687	0.492562
ILMN_1781383	8	8q24.3	TONSL	tonsoku like, DNA repair protein	4796	0.351556	0.0443644	0.560328
ILMN_1720531	19	19p13.3	KDM4B	lysine demethylase 4B	23030	0.35132	0.00601185	0.34191
ILMN_1803561	1	1q31.1	PLA2G4A	phospholipase A2 group IVA	5321	0.351208	0.0262643	0.491142
ILMN_2110271	19	19p13.2	OLFM2	olfactomedin 2	93145	0.351121	0.0292722	0.506133
ILMN_1731353	2	2q35	CHPF	chondroitin polymerizing factor	79586	0.350755	0.0357239	0.535588
ILMN_1697559	X	Xq28	G6PD	glucose-6-phosphate dehydrogenase	2539	0.350645	0.0142132	0.437852
ILMN_1694068	1	1q44	EFCAB2	EF-hand calcium binding domain 2	84288	0.350094	0.00347134	0.300925
ILMN_1656364	X	Xq11.2	ASB12	ankyrin repeat and SOCS box containing 12	142689	0.34905	0.0211492	0.469203
ILMN_1653712	9	9q34.3	UAP1L1	UDP-N-acetylglucosamine pyrophosphorylase 1 like 1	91373	0.348562	0.0112121	0.402236
ILMN_1728049	1	1q21.3	S100A16	S100 calcium binding protein A16	140576	0.347506	0.00632506	0.343942
ILMN_1707791	X	Xq28	TAZ	tafazzin	6901	0.347311	0.0356233	0.535588
ILMN_1744676	17	17p11.2	RNF112	ring finger protein 112	7732	0.347218	0.0084026	0.376219
ILMN_1699727	17	17q25.3	BAIAP2	BAR/IMD domain containing adaptor protein 2	10458	0.347091	0.0305544	0.515465
ILMN_1758895	1	1q21.3	CTSK	cathepsin K	1513	0.347034	0.0447803	0.561385
ILMN_1731568	19	19p13.2	RAB3D	RAB3D, member RAS oncogene family	9545	0.346968	0.00688303	0.356841
ILMN_1745398	10	10q21.1	PCDH15	protocadherin related 15	65217	0.346893	0.00544045	0.333336
ILMN_1784110	1	1q32.1	CDK18	cyclin dependent kinase 18	5129	0.346828	0.0267219	0.491671
ILMN_1663616	17	17q21.2	DNAJC7	DnaJ heat shock protein family (Hsp40) member C7	7266	0.346491	0.00877217	0.380695
ILMN_1775501	2	2q14.1	IL1B	interleukin 1 beta	3553	0.346167	0.00882804	0.380695
ILMN_3236935	17	17q25.3	ARHGDIA	Rho GDP dissociation inhibitor alpha	396	0.346143	0.00281269	0.282806
ILMN_1797362	7	7q11.23	LIMK1	LIM domain kinase 1	3984	0.345421	0.0174564	0.455716
ILMN_2407811	17	17p13.1	NEURL4	neuralized E3 ubiquitin protein ligase 4	84461	0.345416	0.0119316	0.415455
ILMN_1695404	8	8q24.3	LY6E	lymphocyte antigen 6 family member E	4061	0.345277	0.00434315	0.317908
ILMN_1670875	17	17q23.2	PPM1D	protein phosphatase, Mg2+/Mn2+ dependent 1D	8493	0.345185	0.00563143	0.335318
ILMN_2352293	11	11q24.3	PRDM10	PR/SET domain 10	56980	0.344842	0.0220518	0.473733
ILMN_1795949	16	16p13.3	CORO7	coronin 7	79585	0.344806	0.0164764	0.452024
ILMN_1790227	19	19q13.32	IGFL2	IGF like family member 2	147920	0.344437	0.0132697	0.427344
ILMN_2387496	1	1p11.2	PFN1P2	profilin 1 pseudogene 2	767846	0.344386	0.00711718	0.360514
ILMN_2363250	18	18q21.33	BCL2	BCL2 apoptosis regulator	596	0.344337	0.0342206	0.532084
ILMN_1726906	19	19q13.33	AKT1S1	AKT1 substrate 1	84335	0.344332	0.0266037	0.491142
ILMN_1709623	17	17p11.2	MAPK7	mitogen-activated protein kinase 7	5598	0.344037	0.0222772	0.473733
ILMN_1786347	5	5q13.2	TNPO1	transportin 1	3842	0.344006	0.0271905	0.495681
ILMN_1677920	3	3p21.31	LTF	lactotransferrin	4057	0.343974	0.0265205	0.491142
ILMN_1711703	16	16q22.1	C16orf70	chromosome 16 open reading frame 70	80262	0.34321	0.00474201	0.326318
ILMN_2123567	3	3q27.2	SENP2	SUMO specific peptidase 2	59343	0.343117	0.00361286	0.306156
ILMN_3234089	13	13q13.1	N4BP2L2	NEDD4 binding protein 2 like 2	10443	0.343074	0.00249907	0.276148
ILMN_1763739	16	16p13.3	CAPN15	calpain 15	6650	0.342916	0.00720376	0.360514
ILMN_2408796	19	19p13.3	MFSD12	major facilitator superfamily domain containing 12	126321	0.342842	0.0435676	0.557098
ILMN_2340877	11	11q13.1	MEN1	menin 1	4221	0.342815	0.0186114	0.459175
ILMN_2150797	2	2q35	TNP1	transition protein 1	7141	0.342745	0.0045958	0.323636
ILMN_2413517	6	6p22.1	TRIM39	tripartite motif containing 39	56658	0.342699	0.0090547	0.382794
ILMN_2313079	17	17p13.2	NLRP1	NLR family pyrin domain containing 1	22861	0.342664	0.0143015	0.437852
ILMN_1718619	1	1q42.13	TRIM11	tripartite motif containing 11	81559	0.342448	0.0245225	0.483383
ILMN_1809147	22	22q13.31	FAM118A	family with sequence similarity 118 member A	55007	0.342443	0.0238051	0.478788
ILMN_2354673	19	19q13.2	PAK4	p21 (RAC1) activated kinase 4	10298	0.342425	0.0274232	0.496036
ILMN_1757631	16	16q24.3	DBNDD1	dysbindin domain containing 1	79007	0.342356	0.0364286	0.536914
ILMN_2160929	11	11q12.2	FEN1	flap structure-specific endonuclease 1	2237	0.342337	0.0223506	0.473733
ILMN_2319000	19	19p13.3	MATK	megakaryocyte-associated tyrosine kinase	4145	0.342219	0.0149215	0.440063
ILMN_1717706	5	5q11.2	PLK2	polo like kinase 2	10769	0.341848	0.0193665	0.459175
ILMN_1669390	19	19q13.32	PPP1R13L	protein phosphatase 1 regulatory subunit 13 like	10848	0.341567	0.000861227	0.208813
ILMN_1702009	1	1q21.2	SV2A	synaptic vesicle glycoprotein 2A	9900	0.340801	0.0189769	0.459175
ILMN_1716400	12	12p13.33	FOXM1	forkhead box M1	2305	0.340778	0.00633494	0.343942
ILMN_1776674	11	11q13.1	SAC3D1	SAC3 domain containing 1	29901	0.340356	0.0195008	0.459175
ILMN_1759232	2	2q36.3	IRS1	insulin receptor substrate 1	3667	0.340282	0.0271491	0.495234
ILMN_1767032	11	11q22.3	DDI1	DNA damage inducible 1 homolog 1	414301	0.340216	0.0202805	0.462951
ILMN_1732612	9	9p13.1	SHB	SH2 domain containing adaptor protein B	6461	0.340188	0.0142538	0.437852
ILMN_1775853	3	3p14.1	MAGI1	membrane associated guanylate kinase, WW and PDZ domain containing 1	9223	0.339727	0.0135919	0.430796
ILMN_1676014	14	14q11.2	DHRS4L1	dehydrogenase/reductase 4 like 1	728635	0.339613	0.0261583	0.491142
ILMN_1740395	19	19p13.2	RAVER1	ribonucleoprotein, PTB binding 1	125950	0.339509	0.0046561	0.323636
ILMN_1815264	22	22q12.2	RHBDD3	rhomboid domain containing 3	25807	0.338894	0.0278854	0.49898
ILMN_1682831	2	2q23.3	NEB	nebulin	4703	0.338847	0.0423174	0.553688
ILMN_1745112	9	9q34.11	FAM102A	family with sequence similarity 102 member A	399665	0.338802	0.00462232	0.323636
ILMN_1682037	16	16q22.1	FBXL8	F-box and leucine rich repeat protein 8	55336	0.338738	0.0306631	0.515465
ILMN_1756693	16	16p12.1	ARHGAP17	Rho GTPase activating protein 17	55114	0.338712	0.0125349	0.423339
ILMN_1765796	12	12p13.31	ENO2	enolase 2	2026	0.33828	0.0254167	0.486592
ILMN_1768273	8	8q22.2	POP1	POP1 homolog, ribonuclease P/MRP subunit	10940	0.338223	0.0155112	0.448244
ILMN_1658702	6	6p22.1	H2BC11	H2B clustered histone 11	8970	0.338157	0.0127836	0.4237
ILMN_1660551	16	16p13.3	CRAMP1	cramped chromatin regulator homolog 1	57585	0.33804	0.0433593	0.557094
ILMN_2121272	6	6q27	PDE10A	phosphodiesterase 10A	10846	0.337998	0.0140756	0.437852
ILMN_3251616	2	2q34	KANSL1L	KAT8 regulatory NSL complex subunit 1 like	151050	0.337943	0.0484459	0.57122
ILMN_2165753	6	6p22.1	HLA-A	major histocompatibility complex, class I, A	3105	0.337873	0.0220235	0.473733
ILMN_1712708	17	17q25.1	TRIM47	tripartite motif containing 47	91107	0.33779	0.00619556	0.343401
ILMN_1716249	9	9q33.2	OR1K1	olfactory receptor family 1 subfamily K member 1	392392	0.337241	0.0155696	0.448244
ILMN_1657002	11	11p15.4	OR51B5	olfactory receptor family 51 subfamily B member 5	282763	0.336915	0.00846907	0.376262
ILMN_2310685	17	17q25.3	FOXK2	forkhead box K2	3607	0.336686	0.0166738	0.453913
ILMN_1703305	3	3p21.2	TWF2	twinfilin actin binding protein 2	11344	0.336622	0.00763588	0.36804
ILMN_1758311	10	10p15.1	NET1	neuroepithelial cell transforming 1	10276	0.336452	0.0246971	0.484057
ILMN_1781565	15	15q25.1	TLNRD1	talin rod domain containing 1	59274	0.33615	0.026874	0.492562
ILMN_1677800	19	19p13.3	SGTA	small glutamine rich tetratricopeptide repeat containing alpha	6449	0.336103	0.011857	0.415455
ILMN_2075440	1	1q21.1	PDIA3P1	protein disulfide isomerase family A member 3 pseudogene 1	171423	0.336013	0.00466589	0.323665
ILMN_1760303	5	5q13.1	PIK3R1	phosphoinositide-3-kinase regulatory subunit 1	5295	0.335589	0.0221341	0.473733
ILMN_1706273	11	11p15.5	MOB2	MOB kinase activator 2	81532	0.335493	0.0106099	0.393813
ILMN_1722533	13	13q12.3	KATNAL1	katanin catalytic subunit A1 like 1	84056	0.335375	0.00952236	0.387595
ILMN_1710847	X	Xp21.1	MAGEB16	MAGE family member B16	139604	0.334103	0.0435401	0.557098
ILMN_1803779	11	11p15.5	AP2A2	adaptor related protein complex 2 subunit alpha 2	161	0.334061	0.0317619	0.518025
ILMN_1784977	19	19p13.3	DOHH	deoxyhypusine hydroxylase	83475	0.333341	0.0284732	0.503914
ILMN_1768488	16	16q22.1	TERF2	telomeric repeat binding factor 2	7014	0.33293	0.00792955	0.374835
ILMN_1708534	2	2q14.1	PAX8	paired box 8	7849	0.332702	0.0164809	0.452024
ILMN_1763491	15	15q15.3	CKMT1B	creatine kinase, mitochondrial 1B	1159	0.332586	0.00562636	0.335318
ILMN_1663791	1	1p34.1	CCDC163	coiled-coil domain containing 163	126661	0.332243	0.0174618	0.455716
ILMN_1728626	9	9q34.2	WDR5	WD repeat domain 5	11091	0.331677	0.00787704	0.374388
ILMN_1667319	19	19p13.2	PLPPR2	phospholipid phosphatase related 2	64748	0.331113	0.0189441	0.459175
ILMN_1805995	4	4q22.3-q23	STPG2	sperm tail PG-rich repeat containing 2	285555	0.330535	0.0176836	0.456982
ILMN_1681927	19	19p13.3	HDGFL2	HDGF like 2	84717	0.330431	0.0267445	0.491671
ILMN_1770425	16	16p11.2	CDIPT	CDP-diacylglycerol--inositol 3-phosphatidyltransferase	10423	0.330008	0.0363566	0.536579
ILMN_2396410	12	12q13.3	CS	citrate synthase	1431	0.329788	0.0102934	0.392561
ILMN_1711826	9	9p22.1-p21.3	SLC24A2	solute carrier family 24 member 2	25769	0.32977	0.0285453	0.503914
ILMN_2307025	20	20q11.22	CPNE1	copine 1	8904	0.329426	0.00821856	0.376151
ILMN_1783285	1	1p34.2	CTPS1	CTP synthase 1	1503	0.329378	0.00156636	0.259624
ILMN_1652072	5	5p12	NIM1K	NIM1 serine/threonine protein kinase	167359	0.329256	0.0353162	0.533735
ILMN_2309156	20	20q13.31	PMEPA1	prostate transmembrane protein, androgen induced 1	56937	0.328365	0.0189543	0.459175
ILMN_3216684	3	3p13	PPP4R2	protein phosphatase 4 regulatory subunit 2	151987	0.32824	0.0141337	0.437852
ILMN_1671076	6	6q12-q13	ADGRB3	adhesion G protein-coupled receptor B3	577	0.327925	0.0152186	0.444264
ILMN_1726969	11	11p15.4	OR51S1	olfactory receptor family 51 subfamily S member 1	119692	0.327281	0.0450795	0.561611
ILMN_1773026	1	1p36.33	VWA1	von Willebrand factor A domain containing 1	64856	0.326964	0.0264271	0.491142
ILMN_1809818	1	1q23.1	PRCC	proline rich mitotic checkpoint control factor	5546	0.326963	0.00224656	0.269443
ILMN_1755350	8	8p21.3	PIWIL2	piwi like RNA-mediated gene silencing 2	55124	0.326745	0.00537229	0.333121
ILMN_1705562	18	18p11.22	MTCL1	microtubule crosslinking factor 1	23255	0.326314	0.0329058	0.524595
ILMN_2303912	4	4q21.22	SCD5	stearoyl-CoA desaturase 5	79966	0.326308	0.0301777	0.51329
ILMN_1810891	16	16p11.2	ZNF629	zinc finger protein 629	23361	0.326084	0.0283786	0.5038
ILMN_1810977	3	3q22.1	CDV3	CDV3 homolog	55573	0.325953	0.00763333	0.36804
ILMN_1732725	11	11q13.2	PPP6R3	protein phosphatase 6 regulatory subunit 3	55291	0.325877	0.00208359	0.269374
ILMN_1803423	X	Xq26.3	ARHGEF6	Rac/Cdc42 guanine nucleotide exchange factor 6	9459	0.325642	0.00329458	0.296706
ILMN_2121979	4	4q13.2	UGT2A3	UDP glucuronosyltransferase family 2 member A3	79799	0.325489	0.037685	0.541571
ILMN_1773389	20	20q13.12	PLTP	phospholipid transfer protein	5360	0.325296	0.0124061	0.422223
ILMN_1665219	19	19q13.2	LTBP4	latent transforming growth factor beta binding protein 4	8425	0.325003	0.0389475	0.545858
ILMN_1755582	X	Xp11.23	PCSK1N	proprotein convertase subtilisin/kexin type 1 inhibitor	27344	0.324994	0.0321574	0.520497
ILMN_1732609	9	9p13.3	FAM214B	family with sequence similarity 214 member B	80256	0.324828	0.00875131	0.380695
ILMN_2370692	2	2q35	ANKZF1	ankyrin repeat and zinc finger peptidyl tRNA hydrolase 1	55139	0.324489	0.00224238	0.269443
ILMN_1682354	19	19q13.33	SNORD33	small nucleolar RNA, C/D box 33	26818	0.324411	0.0468262	0.565698
ILMN_1673773	11	11p15.4	GALNT18	polypeptide N-acetylgalactosaminyltransferase 18	374378	0.324213	0.018348	0.459027
ILMN_2279182	12	12q13.13	SMAGP	small cell adhesion glycoprotein	57228	0.323992	0.0143551	0.437852
ILMN_1750896	9	9q31.1	STX17	syntaxin 17	55014	0.323928	0.0267541	0.491671
ILMN_1672591	2	2q24.3	SCN9A	sodium voltage-gated channel alpha subunit 9	6335	0.323827	0.0321366	0.520405
ILMN_1719975	12	12q13.13	HOXC4	homeobox C4	3221	0.323472	0.0129276	0.42548
ILMN_1794781	9	9q34.2	VAV2	vav guanine nucleotide exchange factor 2	7410	0.323218	0.00919195	0.385057
ILMN_1679520	6	6p21.32	AGPAT1	1-acylglycerol-3-phosphate O-acyltransferase 1	10554	0.323205	0.00205552	0.269374
ILMN_2328224	11	11p11.2	MADD	MAP kinase activating death domain	8567	0.323192	0.0106696	0.394124
ILMN_1687833	20	20q11.21	HM13	histocompatibility minor 13	81502	0.322671	0.0165187	0.452579
ILMN_1739914	9	9q32	ZNF618	zinc finger protein 618	114991	0.322506	0.0251648	0.486041
ILMN_2097259	4	4q25	CYP2U1	cytochrome P450 family 2 subfamily U member 1	113612	0.322333	0.0172466	0.455716
ILMN_1698419	12	12q24.31	NCOR2	nuclear receptor corepressor 2	9612	0.322224	0.00540207	0.333336
ILMN_1703041	4	4p16.3	IDUA	alpha-L-iduronidase	3425	0.321657	0.00837833	0.376219
ILMN_1805973	12	12p13.1	GPR19	G protein-coupled receptor 19	2842	0.321313	0.00593458	0.340203
ILMN_1701940	9	9q34.11	MIGA2	mitoguardin 2	84895	0.32127	0.00257036	0.278381
ILMN_1718633	22	22q11.23	LRP5L	LDL receptor related protein 5 like	91355	0.321193	0.0150839	0.442479
ILMN_2375557	1	1p34.2	SCMH1	Scm polycomb group protein homolog 1	22955	0.321169	0.0327687	0.524302
ILMN_1727444	16	16p11.2	PAGR1	PAXIP1 associated glutamate rich protein 1	79447	0.320711	0.0222455	0.473733
ILMN_3261292	20	20p13	EBF4	EBF family member 4	57593	0.320627	0.0126456	0.423339
ILMN_1777129	16	16q22.1	CENPT	centromere protein T	80152	0.320479	0.0160221	0.449686
ILMN_1789510	11	11q13.1	STIP1	stress induced phosphoprotein 1	10963	0.320396	0.00377554	0.308367
ILMN_1729987	20	20q11.23	SRC	SRC proto-oncogene, non-receptor tyrosine kinase	6714	0.32028	0.00725281	0.360859
ILMN_1889669	17	17p13.2	C17orf107	chromosome 17 open reading frame 107	100130311	0.32012	0.020457	0.463996
ILMN_1801610	17	17q25.3	METRNL	meteorin like, glial cell differentiation regulator	284207	0.31976	0.00712508	0.360514
ILMN_1843932	5	5q33.2	SAP30L	SAP30 like	79685	0.319172	0.0211075	0.468994
ILMN_1653599	19	19p13.3	ATP5F1D	ATP synthase F1 subunit delta	513	0.319119	0.0371584	0.540125
ILMN_1732830	17	17p13.3	RAP1GAP2	RAP1 GTPase activating protein 2	23108	0.319089	0.0309452	0.516448
ILMN_1785785	2	2p23.3	NCOA1	nuclear receptor coactivator 1	8648	0.318805	0.00918154	0.385057
ILMN_2278819	8	8q13.1	PDE7A	phosphodiesterase 7A	5150	0.318415	0.0352755	0.533735
ILMN_1785618	22	22q12.2	SMTN	smoothelin	6525	0.318356	0.0137781	0.433697
ILMN_2317923	11	11q12.2	TMEM132A	transmembrane protein 132A	54972	0.318356	0.0347019	0.533355
ILMN_1745533	17	17q21.33	FAM117A	family with sequence similarity 117 member A	81558	0.317998	0.0225971	0.473733
ILMN_1792860	9	9q34.2	MED22	mediator complex subunit 22	6837	0.31773	0.0126744	0.423339
ILMN_1720476	9	9q22.31	PHF2	PHD finger protein 2	5253	0.317356	0.00439953	0.318342
ILMN_1659024	1	1q32.1	TMCC2	transmembrane and coiled-coil domain family 2	9911	0.316975	0.0420782	0.553688
ILMN_1765109	1	1p36.31	TNFRSF25	TNF receptor superfamily member 25	8718	0.31681	0.0236027	0.477083
ILMN_1809676	19	19q13.42	CACNG6	calcium voltage-gated channel auxiliary subunit gamma 6	59285	0.316732	0.0464613	0.565698
ILMN_1756998	14	14q32.13	DICER1	dicer 1, ribonuclease III	23405	0.316647	0.0103693	0.393183
ILMN_1739641	22	22q12.2	MTMR3	myotubularin related protein 3	8897	0.316602	0.00187488	0.266494
ILMN_3239130	10	10q11.23	AGAP6	ArfGAP with GTPase domain, ankyrin repeat and PH domain 6	414189	0.316138	0.0230859	0.473733
ILMN_1667804	20	20p11.1	FAM182B	family with sequence similarity 182 member B	728882	0.315962	0.0273044	0.496013
ILMN_1753165	12	12p13.33	WNK1	WNK lysine deficient protein kinase 1	65125	0.31592	0.031982	0.51961
ILMN_1776601	1	1p36.33	OR4F5	olfactory receptor family 4 subfamily F member 5	79501	0.315149	0.00714811	0.360514
ILMN_1780940	6	6p21.1	PPP2R5D	protein phosphatase 2 regulatory subunit B'delta	5528	0.314871	0.0147419	0.438031
ILMN_3237381	6	6p21.2	TMEM217	transmembrane protein 217	221468	0.314832	0.0291338	0.504985
ILMN_1724612	17	17p13.1	SLC25A35	solute carrier family 25 member 35	399512	0.314686	0.0026574	0.279318
ILMN_1806474	17	17q21.31	NBR1	NBR1 autophagy cargo receptor	4077	0.314481	0.0393467	0.546114
ILMN_1684802	10	10q24.33	TAF5	TATA-box binding protein associated factor 5	6877	0.314025	0.00751777	0.365616
ILMN_1812902	21	21q21.3	CYYR1	cysteine and tyrosine rich 1	116159	0.31377	0.0190517	0.459175
ILMN_1726266	10	10q26.2	ADAM12	ADAM metallopeptidase domain 12	8038	0.313461	0.0227484	0.473733
ILMN_2174729	6	6p21.1	ZNF318	zinc finger protein 318	24149	0.313426	0.0294603	0.507329
ILMN_1775304	19	19p13.12	DNAJB1	DnaJ heat shock protein family (Hsp40) member B1	3337	0.313127	0.00518154	0.329169
ILMN_3308220	12	12q13.12	MIR1293	microRNA 1293	100302220	0.31306	0.00640778	0.34434
ILMN_3247802	9	9q34.13	PRRC2B	proline rich coiled-coil 2B	84726	0.312975	0.0423636	0.553688
ILMN_2330966	8	8p21.2	PTK2B	protein tyrosine kinase 2 beta	2185	0.312864	0.013156	0.427299
ILMN_1781104	19	19p13.2	MAP2K7	mitogen-activated protein kinase kinase 7	5609	0.312748	0.0102888	0.392561
ILMN_1776850	19	19p13.3	NMRK2	nicotinamide riboside kinase 2	27231	0.312747	0.0273721	0.496036
ILMN_1724407	4	4p16.3	TACC3	transforming acidic coiled-coil containing protein 3	10460	0.312556	0.013099	0.427299
ILMN_3227060	6	6q21	AMD1	adenosylmethionine decarboxylase 1	262	0.312444	0.0275488	0.496866
ILMN_1708348	10	10q26.3	ADAM8	ADAM metallopeptidase domain 8	101	0.312239	0.0359396	0.535812
ILMN_1765523	11	11p15.5	TOLLIP	toll interacting protein	54472	0.311945	0.0289377	0.503914
ILMN_1653165	2	2q35	AAMP	angio associated migratory cell protein	14	0.311879	0.00815733	0.375997
ILMN_1750678	5	5q33.3	TIMD4	T cell immunoglobulin and mucin domain containing 4	91937	0.311861	0.000584726	0.181613
ILMN_2406552	11	11p15.5	PIDD1	p53-induced death domain protein 1	55367	0.311606	0.0187794	0.459175
ILMN_1737314	3	3q27.3	BCL6	BCL6 transcription repressor	604	0.311496	0.0293172	0.506133
ILMN_1804822	20	20p13	SRXN1	sulfiredoxin 1	140809	0.311294	0.00319825	0.294522
ILMN_1691403	1	1p22.3	SYDE2	synapse defective Rho GTPase homolog 2	84144	0.311187	0.03595	0.535812
ILMN_1808811	19	19p13.3	SBNO2	strawberry notch homolog 2	22904	0.310998	0.0363982	0.536753
ILMN_2377109	1	1p35.2	LCK	LCK proto-oncogene, Src family tyrosine kinase	3932	0.310607	0.0146642	0.437852
ILMN_1686664	16	16q13	MT2A	metallothionein 2A	4502	0.310092	0.00200839	0.269374
ILMN_1697088	16	16p11.2	ARMC5	armadillo repeat containing 5	79798	0.309919	0.0145652	0.437852
ILMN_1716680	3	3p26.1	GRM7	glutamate metabotropic receptor 7	2917	0.309742	0.0116653	0.411873
ILMN_1668270	1	1p36.11	ZDHHC18	zinc finger DHHC-type palmitoyltransferase 18	84243	0.309648	0.0306763	0.515465
ILMN_1765578	3	3q25.31	TIPARP	TCDD inducible poly(ADP-ribose) polymerase	25976	0.309586	0.0265763	0.491142
ILMN_1777156	19	19p13.11	GTPBP3	GTP binding protein 3, mitochondrial	84705	0.309262	0.0106421	0.394091
ILMN_2397024	17	17q21.33	SPOP	speckle type BTB/POZ protein	8405	0.309254	0.0227958	0.473733
ILMN_1733402	1	1p13.3	CSF1	colony stimulating factor 1	1435	0.309182	0.0177955	0.456982
ILMN_3306742	9	9p13.3	SIGMAR1	sigma non-opioid intracellular receptor 1	10280	0.308949	0.0241535	0.483167
ILMN_1704342	7	7q36.3	UBE3C	ubiquitin protein ligase E3C	9690	0.308796	0.00361427	0.306156
ILMN_3235221	5	5q14.1	LOC644936	actin beta pseudogene	644936	0.308697	0.00514012	0.329169
ILMN_1669555	13	13q13.3	SUPT20H	SPT20 homolog, SAGA complex component	55578	0.308392	0.0202845	0.462951
ILMN_1663444	19	19q13.33	LIN7B	lin-7 homolog B, crumbs cell polarity complex component	64130	0.308007	0.0234261	0.475082
ILMN_3176790	8	8q12.1	UBXN2B	UBX domain protein 2B	137886	0.307642	0.00946232	0.387595
ILMN_1811682	7	7q11.23	CLIP2	CAP-Gly domain containing linker protein 2	7461	0.307588	0.00295223	0.285889
ILMN_1789112	19	19q13.2	TMEM145	transmembrane protein 145	284339	0.307331	0.0436077	0.557098
ILMN_1784780	19	19q13.2	CIC	capicua transcriptional repressor	23152	0.307325	0.0336982	0.529043
ILMN_1736929	2	2p23.2	PLB1	phospholipase B1	151056	0.307075	0.0217343	0.473733
ILMN_1796336	19	19p13.11	MAP1S	microtubule associated protein 1S	55201	0.306762	0.0340512	0.531438
ILMN_1768506	8	8q24.3	MAPK15	mitogen-activated protein kinase 15	225689	0.306729	0.0208368	0.465868
ILMN_2275803	17	17q25.3	LRRC45	leucine rich repeat containing 45	201255	0.306719	0.00231241	0.271166
ILMN_2397795	13	13q22.3	SLAIN1	SLAIN motif family member 1	122060	0.306626	0.025882	0.48918
ILMN_1731503	2	2q14.2	MARCO	macrophage receptor with collagenous structure	8685	0.306274	0.0178491	0.456982
ILMN_1668851	1	1p36.21	AADACL4	arylacetamide deacetylase like 4	343066	0.306032	0.00533412	0.333121
ILMN_1676899	3	3q27.1	YEATS2	YEATS domain containing 2	55689	0.305829	0.0252836	0.486422
ILMN_1656300	8	8p21.3	GFRA2	GDNF family receptor alpha 2	2675	0.305628	0.0373447	0.540568
ILMN_1709800	7	7q11.23	POMZP3	POM121 and ZP3 fusion	22932	0.305527	0.0481195	0.570485
ILMN_1755589	12	12q13.12	DIP2B	disco interacting protein 2 homolog B	57609	0.305347	0.0361972	0.536515
ILMN_1755620	9	9q34.11	IER5L	immediate early response 5 like	389792	0.305337	0.0300247	0.51295
ILMN_1710026	7	7q31.32	RNF133	ring finger protein 133	168433	0.305065	0.0135466	0.430796
ILMN_1680618	8	8q24.21	MYC	MYC proto-oncogene, bHLH transcription factor	4609	0.305049	0.023717	0.478727
ILMN_1729188	19	19q13.12	HAMP	hepcidin antimicrobial peptide	57817	0.304984	0.0031787	0.294522
ILMN_1711838	1	1p13.3	SLC25A24	solute carrier family 25 member 24	29957	0.304821	0.0151228	0.442967
ILMN_2245305	20	20p11.21	ABHD12	abhydrolase domain containing 12, lysophospholipase	26090	0.304785	0.0034263	0.299694
ILMN_1781560	3	3q12.1	ST3GAL6	ST3 beta-galactoside alpha-2,3-sialyltransferase 6	10402	0.303919	0.0486015	0.57122
ILMN_1742981	12	12q13.12	TUBA1A	tubulin alpha 1a	7846	0.303814	0.0140827	0.437852
ILMN_1706511	22	22q13.2	TEF	TEF transcription factor, PAR bZIP family member	7008	0.303598	0.0173361	0.455716
ILMN_1697544	14	14q32.2	SLC25A29	solute carrier family 25 member 29	123096	0.303483	0.0478775	0.569378
ILMN_3276971	1	1p36.33	DVL1	dishevelled segment polarity protein 1	1855	0.303157	0.0282637	0.502726
ILMN_1812441	17	17q11.2	FAM222B	family with sequence similarity 222 member B	55731	0.302968	0.018507	0.459175
ILMN_3309649	3	3p21.31	MIR1226	microRNA 1226	100302232	0.302915	0.00220641	0.269443
ILMN_1792256	17	17q23.2	TBX2	T-box transcription factor 2	6909	0.302896	0.00969425	0.388907
ILMN_1802799	1	1p34.3	AKIRIN1	akirin 1	79647	0.30275	0.0160975	0.450067
ILMN_1799299	1	1p13.3	PRPF38B	pre-mRNA processing factor 38B	55119	0.302303	0.0255929	0.487341
ILMN_2099745	11	11q24.3	TP53AIP1	tumor protein p53 regulated apoptosis inducing protein 1	63970	0.302301	0.0158977	0.449686
ILMN_3242586	1	1q42.13	RHOU	ras homolog family member U	58480	0.30187	0.0460843	0.564807
ILMN_1742166	19	19q13.33	GRWD1	glutamate rich WD repeat containing 1	83743	0.301696	0.0141901	0.437852
ILMN_1770719	17	17p13.3	CLUH	clustered mitochondria homolog	23277	0.301522	0.00350014	0.300925
ILMN_1742230	14	14q13.1-q13.2	BAZ1A	bromodomain adjacent to zinc finger domain 1A	11177	0.30137	0.018512	0.459175
ILMN_1796949	20	20q11.21	TPX2	TPX2 microtubule nucleation factor	22974	0.301327	0.016427	0.452024
ILMN_2133638	17	17p13.1	CTDNEP1	CTD nuclear envelope phosphatase 1	23399	0.30129	0.0222706	0.473733
ILMN_1786628	9	9p11.2	CNTNAP3B	contactin associated protein family member 3B	728577	0.301138	0.00429984	0.317908
ILMN_2382648	X	Xq22.3	MID2	midline 2	11043	0.300599	0.0144127	0.437852
ILMN_1665831	19	19q13.32	CLPTM1	CLPTM1 regulator of GABA type A receptor forward trafficking	1209	0.300471	0.01889	0.459175
ILMN_1770035	20	20q13.12	NCOA5	nuclear receptor coactivator 5	57727	0.299643	0.0185776	0.459175
ILMN_1789839	16	16p12.1	GTF3C1	general transcription factor IIIC subunit 1	2975	0.299615	0.0179431	0.456982
ILMN_1766652	20	20q13.13	MOCS3	molybdenum cofactor synthesis 3	27304	0.299402	0.0407906	0.551057
ILMN_1707585	9	9q32	SLC46A2	solute carrier family 46 member 2	57864	0.299383	0.0362629	0.536579
ILMN_3309639	14	14q32.31	MIR487A	microRNA 487a	619555	0.29909	0.00993271	0.391067
ILMN_1778144	12	12q13.11	SLC48A1	solute carrier family 48 member 1	55652	0.29897	0.0111266	0.40144
ILMN_1688089	12	12q24.23	PEBP1	phosphatidylethanolamine binding protein 1	5037	0.298963	0.0144906	0.437852
ILMN_1668514	19	19p13.3	PIP5K1C	phosphatidylinositol-4-phosphate 5-kinase type 1 gamma	23396	0.298514	0.0342752	0.532084
ILMN_1815158	17	17p13.1	GPS2	G protein pathway suppressor 2	2874	0.298331	0.0329866	0.524665
ILMN_1753639	9	9p21.3	MTAP	methylthioadenosine phosphorylase	4507	0.297994	0.0240864	0.482791
ILMN_1734184	12	12q24.13	PLBD2	phospholipase B domain containing 2	196463	0.297524	0.0194428	0.459175
ILMN_2293631	17	17q25.2	MGAT5B	alpha-1,6-mannosylglycoprotein 6-beta-N-acetylglucosaminyltransferase B	146664	0.297517	0.0395291	0.546114
ILMN_1788131	10	10q23.33	CYP26A1	cytochrome P450 family 26 subfamily A member 1	1592	0.297413	0.0370703	0.539711
ILMN_1758378	9	9q34.13	TSC1	TSC complex subunit 1	7248	0.296985	0.00579594	0.338506
ILMN_1652314	8	8q22.2	SPAG1	sperm associated antigen 1	6674	0.296789	0.0160175	0.449686
ILMN_1710427	12	12q24.31	VPS37B	VPS37B subunit of ESCRT-I	79720	0.296589	0.011148	0.40144
ILMN_1691156	16	16q13	MT1A	metallothionein 1A	4489	0.296483	0.00258561	0.278381
ILMN_2065773	15	15q13.3	SCG5	secretogranin V	6447	0.296365	0.0132639	0.427344
ILMN_1738491	9	9q32	SNX30	sorting nexin family member 30	401548	0.295824	0.0341299	0.532084
ILMN_1734543	10	10q26.2	PTPRE	protein tyrosine phosphatase receptor type E	5791	0.295697	0.018772	0.459175
ILMN_1717403	9	9p13.3	ARHGEF39	Rho guanine nucleotide exchange factor 39	84904	0.295688	0.0478733	0.569378
ILMN_1783497	10	10q23.31	PANK1	pantothenate kinase 1	53354	0.295527	0.026057	0.490351
ILMN_2401618	17	17q21.2	MLX	MAX dimerization protein MLX	6945	0.29544	0.0101042	0.392561
ILMN_1802761	3	3p21.2	WDR82	WD repeat domain 82	80335	0.295345	0.0391579	0.545858
ILMN_1798619	22	22q12.3	KCTD17	potassium channel tetramerization domain containing 17	79734	0.295071	0.0381415	0.5445
ILMN_1718770	19	19q13.33	MAMSTR	MEF2 activating motif and SAP domain containing transcriptional regulator	284358	0.295018	0.0371614	0.540125
ILMN_1756705	16	16p13.3	CHTF18	chromosome transmission fidelity factor 18	63922	0.294936	0.0447464	0.561385
ILMN_1691736	9	9q34.11	ST6GALNAC6	ST6 N-acetylgalactosaminide alpha-2,6-sialyltransferase 6	30815	0.294708	0.0258602	0.48918
ILMN_1760593	12	12q23.3	CRY1	cryptochrome circadian regulator 1	1407	0.294697	0.0172758	0.455716
ILMN_1804361	10	10q24.32	SUFU	SUFU negative regulator of hedgehog signaling	51684	0.294687	0.0342077	0.532084
ILMN_2059886	22	22q13.31	TTC38	tetratricopeptide repeat domain 38	55020	0.294555	0.00827018	0.376151
ILMN_2154052	18	18q21.33	KDSR	3-ketodihydrosphingosine reductase	2531	0.294216	0.012929	0.42548
ILMN_1801516	2	2q37.3	GPC1	glypican 1	2817	0.29386	0.047793	0.569157
ILMN_1724145	17	17q25.3	CBX4	chromobox 4	8535	0.293566	0.0172218	0.455716
ILMN_1741059	2	2q24.3	SCN1A	sodium voltage-gated channel alpha subunit 1	6323	0.292973	0.0463823	0.565698
ILMN_1771264	15	15q15.3	ELL3	elongation factor for RNA polymerase II 3	80237	0.292905	0.0256951	0.487987
ILMN_1655504	12	12q24.11	IFT81	intraflagellar transport 81	28981	0.292657	0.0203224	0.462951
ILMN_1790354	1	1p31.1	RABGGTB	Rab geranylgeranyltransferase subunit beta	5876	0.292368	0.00699268	0.360014
ILMN_2222008	6	6p21.32	KIFC1	kinesin family member C1	3833	0.292296	0.0244835	0.483167
ILMN_1786720	4	4p15.32	PROM1	prominin 1	8842	0.291725	0.0364421	0.536914
ILMN_1758128	17	17q25.1	CYGB	cytoglobin	114757	0.2914	0.0156487	0.448998
ILMN_1766408	16	16q22.1	CBFB	core-binding factor subunit beta	865	0.290367	0.0188548	0.459175
ILMN_1758852	10	10q24.2	ENTPD7	ectonucleoside triphosphate diphosphohydrolase 7	57089	0.290345	0.0312771	0.516448
ILMN_1685279	9	9q22.32	ERCC6L2	ERCC excision repair 6 like 2	375748	0.289756	0.0206085	0.464996
ILMN_1719518	3	3p14.3	ARF4	ADP ribosylation factor 4	378	0.289734	0.00993894	0.391067
ILMN_2074801	19	19p13.2	RGL3	ral guanine nucleotide dissociation stimulator like 3	57139	0.289588	0.0143273	0.437852
ILMN_1806010	6	6p21.1	CUL9	cullin 9	23113	0.289489	0.0265038	0.491142
ILMN_1759948	8	8p11.22	RNF5P1	ring finger protein 5 pseudogene 1	286140	0.289098	0.00131288	0.247339
ILMN_2152581	6	6p21.31	STK38	serine/threonine kinase 38	11329	0.288816	0.0220021	0.473733
ILMN_1769104	5	5q31.1	ZCCHC10	zinc finger CCHC-type containing 10	54819	0.288598	0.0280325	0.499725
ILMN_2394552	X	Xp11.22	WNK3	WNK lysine deficient protein kinase 3	65267	0.288567	0.00669597	0.351906
ILMN_3236904	1	1p21.1	ACTG1P4	actin gamma 1 pseudogene 4	648740	0.287868	0.0105902	0.393813
ILMN_1808712	16	16p11.2	RNF40	ring finger protein 40	9810	0.287848	0.0203786	0.462951
ILMN_2091792	20	20p11.21	ENTPD6	ectonucleoside triphosphate diphosphohydrolase 6	955	0.287821	0.0405027	0.550619
ILMN_1793563	2	2p13.1	DCTN1	dynactin subunit 1	1639	0.287554	0.0319102	0.519178
ILMN_1792110	10	10q24.32	ARMH3	armadillo like helical domain containing 3	79591	0.287387	0.0237674	0.478788
ILMN_1760339	15	15q26.1	ZNF774	zinc finger protein 774	342132	0.287293	0.0159145	0.449686
ILMN_1758798	16	16p11.2	NPIPB9	nuclear pore complex interacting protein family member B9	100507607	0.286949	0.0155209	0.448244
ILMN_1681456	3	3q22.3	FOXL2	forkhead box L2	668	0.286086	0.0247346	0.484518
ILMN_2409754	22	22q13.31	PRR5	proline rich 5	55615	0.286074	0.0397828	0.54687
ILMN_3223871	7	7p21.2	CRPPA	CDP-L-ribitol pyrophosphorylase A	729920	0.285927	0.0465394	0.565698
ILMN_2403852	17	17q25.3	CYTH1	cytohesin 1	9267	0.285361	0.0477329	0.568638
ILMN_2358382	14	14q24.2	ZFYVE1	zinc finger FYVE-type containing 1	53349	0.285315	0.0256526	0.487746
ILMN_2333766	15	15q15.3	PPIP5K1	diphosphoinositol pentakisphosphate kinase 1	9677	0.285288	0.0160304	0.449686
ILMN_2174612	5	5q33.2	CNOT8	CCR4-NOT transcription complex subunit 8	9337	0.285047	0.0251119	0.486041
ILMN_1803192	15	15q15.3	WDR76	WD repeat domain 76	79968	0.284915	0.0422167	0.553688
ILMN_1737847	5	5q35.3	RMND5B	required for meiotic nuclear division 5 homolog B	64777	0.284754	0.0214324	0.471539
ILMN_1714108	8	8q22.1	TP53INP1	tumor protein p53 inducible nuclear protein 1	94241	0.284548	0.0229709	0.473733
ILMN_1687743	14	14q32.12	BTBD7	BTB domain containing 7	55727	0.284516	0.0220816	0.473733
ILMN_1658261	15	15q15.1	MAPKBP1	mitogen-activated protein kinase binding protein 1	23005	0.284044	0.0441733	0.55999
ILMN_1753805	19	19q13.32	PRKD2	protein kinase D2	25865	0.284043	0.0300135	0.51295
ILMN_1765668	3	3q22.3	IL20RB	interleukin 20 receptor subunit beta	53833	0.283917	0.0388525	0.545858
ILMN_1729314	11	11q12.1	PRG2	proteoglycan 2, pro eosinophil major basic protein	5553	0.283878	0.0375728	0.541261
ILMN_1745787	10	10q24.32	POLL	DNA polymerase lambda	27343	0.283845	0.0231598	0.473733
ILMN_3226955	4	4p14	RELL1	RELT like 1	768211	0.283655	0.0253762	0.486592
ILMN_2159172	8	8q21.13	FABP9	fatty acid binding protein 9	646480	0.28314	0.0126943	0.423339
ILMN_1716200	11	11q22.3	ATM	ATM serine/threonine kinase	472	0.282997	0.00374773	0.308367
ILMN_1695397	1	1q41	CAPN8	calpain 8	388743	0.282754	0.0342142	0.532084
ILMN_1705733	1	1q21.2	RPRD2	regulation of nuclear pre-mRNA domain containing 2	23248	0.28266	0.0126607	0.423339
ILMN_1707065	18	18q23	SALL3	spalt like transcription factor 3	27164	0.282312	0.00531641	0.333121
ILMN_1706758	10	10q22.2	SEC24C	SEC24 homolog C, COPII coat complex component	9632	0.282277	0.00890976	0.382056
ILMN_1813735	5	5q23.2	CSNK1G3	casein kinase 1 gamma 3	1456	0.282243	0.0265076	0.491142
ILMN_1729617	1	1p21.1	OLFM3	olfactomedin 3	118427	0.282094	0.019186	0.459175
ILMN_1790410	5	5p13.3	DROSHA	drosha ribonuclease III	29102	0.281756	0.04056	0.550646
ILMN_1652464	2	2q21.1	TUBA3E	tubulin alpha 3e	112714	0.281553	0.0133704	0.428968
ILMN_1739810	17	17p11.2	RAI1	retinoic acid induced 1	10743	0.281523	0.0263608	0.491142
ILMN_1799488	19	19q13.12	ZNF383	zinc finger protein 383	163087	0.28138	0.0286064	0.503914
ILMN_1657237	16	16p13.3	NUBP2	nucleotide binding protein 2	10101	0.280902	0.0158279	0.449686
ILMN_1687035	1	1q21.2	ADAMTSL4	ADAMTS like 4	54507	0.28088	0.0269834	0.4936
ILMN_3251398	17	17q21.2	KRTAP4-11	keratin associated protein 4-11	653240	0.280588	0.0227725	0.473733
ILMN_1723481	10	10q22.1	CHST3	carbohydrate sulfotransferase 3	9469	0.280336	0.0488701	0.571565
ILMN_1659058	6	6p21.33	PPP1R10	protein phosphatase 1 regulatory subunit 10	5514	0.280312	0.0454155	0.56261
ILMN_1700563	19	19q13.43	ZNF552	zinc finger protein 552	79818	0.280126	0.00951995	0.387595
ILMN_1847822	9	9q31.3	ECPAS	Ecm29 proteasome adaptor and scaffold	23392	0.279949	0.0264862	0.491142
ILMN_1656248	11	11q24.1	CLMP	CXADR like membrane protein	79827	0.279853	0.0416111	0.553688
ILMN_3241510	3	3q29	FBXO45	F-box protein 45	200933	0.279516	0.0306138	0.515465
ILMN_2110094	2	2q21.1	CFC1	cripto, FRL-1, cryptic family 1	55997	0.279093	0.0221877	0.473733
ILMN_1786065	19	19p13.3	UHRF1	ubiquitin like with PHD and ring finger domains 1	29128	0.279089	0.0195474	0.459175
ILMN_2358652	11	11q12.3	NXF1	nuclear RNA export factor 1	10482	0.278917	0.00621345	0.343401
ILMN_1779632	21	21q22.3	TRAPPC10	trafficking protein particle complex 10	7109	0.278142	0.0142758	0.437852
ILMN_2395728	19	19q13.2	HNRNPUL1	heterogeneous nuclear ribonucleoprotein U like 1	11100	0.278093	0.0141345	0.437852
ILMN_1742782	6	6p21.33	GPANK1	G-patch domain and ankyrin repeats 1	7918	0.27793	0.0431125	0.556809
ILMN_1658071	1	1q24.2	ATP1B1	ATPase Na+/K+ transporting subunit beta 1	481	0.277862	0.00815343	0.375997
ILMN_1680580	1	1q32.1	ACTG1P25	actin gamma 1 pseudogene 25	148709	0.277823	0.0296218	0.508633
ILMN_2119297	14	14q22.2	SAMD4A	sterile alpha motif domain containing 4A	23034	0.277664	0.010925	0.398855
ILMN_3297945	X	Xp11.3	UBA1	ubiquitin like modifier activating enzyme 1	7317	0.277636	0.00725684	0.360859
ILMN_1725679	8	8p23.3	ZNF596	zinc finger protein 596	169270	0.277464	0.0135735	0.430796
ILMN_1719190	19	19q13.32	CCDC9	coiled-coil domain containing 9	26093	0.277383	0.00858544	0.37891
ILMN_1798083	19	19p13.11	CHERP	calcium homeostasis endoplasmic reticulum protein	10523	0.277308	0.0338699	0.53005
ILMN_3269405	19	19p13.2	HNRNPM	heterogeneous nuclear ribonucleoprotein M	4670	0.277184	0.00312941	0.293178
ILMN_1805345	7	7q22.1	MOSPD3	motile sperm domain containing 3	64598	0.277045	0.038256	0.545799
ILMN_1664922	3	3p14.3	FLNB	filamin B	2317	0.276992	0.00505028	0.329169
ILMN_2335319	2	2p21	KCNG3	potassium voltage-gated channel modifier subfamily G member 3	170850	0.276845	0.00743329	0.365616
ILMN_1667476	12	12p13.31	LTBR	lymphotoxin beta receptor	4055	0.276745	0.0200964	0.462951
ILMN_1710326	3	3q11.2	CLDND1	claudin domain containing 1	56650	0.27671	0.0027027	0.279689
ILMN_1742450	6	6p21.32	TAPBP	TAP binding protein	6892	0.276625	0.0435928	0.557098
ILMN_1787526	2	2q32.2	C2orf88	chromosome 2 open reading frame 88	84281	0.276118	0.0295501	0.508622
ILMN_1659895	X	Xq12	MSN	moesin	4478	0.27511	0.0203494	0.462951
ILMN_1705602	1	1p36.33	KLHL17	kelch like family member 17	339451	0.274838	0.0306427	0.515465
ILMN_1672006	2	2q31.1	SSB	small RNA binding exonuclease protection factor La	6741	0.274801	0.0105157	0.393813
ILMN_1658986	7	7p15.1	CREB5	cAMP responsive element binding protein 5	9586	0.274778	0.0455066	0.563111
ILMN_1701216	16	16q24.2	BANP	BTG3 associated nuclear protein	54971	0.274376	0.00897024	0.382472
ILMN_1736742	1	1q25.3	COLGALT2	collagen beta(1-O)galactosyltransferase 2	23127	0.274365	0.020474	0.464076
ILMN_1689274	15	15q11.2	NIPA1	NIPA magnesium transporter 1	123606	0.274218	0.0197437	0.460661
ILMN_1761598	5	5p14.2	PRDM9	PR/SET domain 9	56979	0.273553	0.0350757	0.533735
ILMN_2306189	X	Xp11.22	MAGED1	MAGE family member D1	9500	0.273352	0.00492747	0.327953
ILMN_2407703	X	Xp11.3-p11.23	SYN1	synapsin I	6853	0.273	0.0348707	0.533601
ILMN_1794967	22	22q12.2	EIF4ENIF1	eukaryotic translation initiation factor 4E nuclear import factor 1	56478	0.272902	0.00759572	0.367339
ILMN_2129388	10	10q23.1	CCSER2	coiled-coil serine rich protein 2	54462	0.272826	0.0362779	0.536579
ILMN_1675709	20	20q13.33	ARFGAP1	ADP ribosylation factor GTPase activating protein 1	55738	0.272402	0.0096994	0.388907
ILMN_1739618	11	11p11.2	ZNF408	zinc finger protein 408	79797	0.272367	0.0223219	0.473733
ILMN_1720440	4	4q21.23	HELQ	helicase, POLQ like	113510	0.272327	0.0222608	0.473733
ILMN_1781231	3	3p22.1	SLC25A38	solute carrier family 25 member 38	54977	0.271898	0.0301776	0.51329
ILMN_2366041	2	2q37.1	ITM2C	integral membrane protein 2C	81618	0.271842	0.00652732	0.347856
ILMN_1705679	19	19p13.3	SAFB2	scaffold attachment factor B2	9667	0.27136	0.00790523	0.374388
ILMN_2375599	11	11p15.5	RNH1	ribonuclease/angiogenin inhibitor 1	6050	0.271284	0.0329423	0.524595
ILMN_2401769	7	7p21.3	PHF14	PHD finger protein 14	9678	0.271198	0.0172013	0.455716
ILMN_2251375	20	20q13.2	ZFP64	ZFP64 zinc finger protein	55734	0.271145	0.0315667	0.516783
ILMN_2388585	6	6q22.1	GOPC	golgi associated PDZ and coiled-coil motif containing	57120	0.271121	0.0073067	0.361934
ILMN_1692168	17	17q21.32	UBE2Z	ubiquitin conjugating enzyme E2 Z	65264	0.271064	0.0159939	0.449686
ILMN_1672547	19	19p13.11	MYO9B	myosin IXB	4650	0.271053	0.0249995	0.485841
ILMN_1724315	7	7q21.3	LMTK2	lemur tyrosine kinase 2	22853	0.270828	0.0471214	0.566387
ILMN_1749822	6	6q16.1	TSG1	tumor suppressor TSG1	643432	0.270823	0.0460554	0.564807
ILMN_1690160	3	3p22.2	SCN5A	sodium voltage-gated channel alpha subunit 5	6331	0.270699	0.00602585	0.34191
ILMN_1769839	1	1p31.3	L1TD1	LINE1 type transposase domain containing 1	54596	0.270544	0.0346353	0.533074
ILMN_1773927	12	12q14.1	LINC01465	long intergenic non-protein coding RNA 1465	283416	0.270151	0.0242112	0.483167
ILMN_2223359	4	4q23	ADH7	alcohol dehydrogenase 7 (class IV), mu or sigma polypeptide	131	0.27006	0.0254131	0.486592
ILMN_1700231	3	3p21.31	IP6K1	inositol hexakisphosphate kinase 1	9807	0.270012	0.0124381	0.422479
ILMN_1673649	11	11q23.3	HYOU1	hypoxia up-regulated 1	10525	0.269899	0.0112238	0.402236
ILMN_1912997	17	17p13.3	VPS53	VPS53 subunit of GARP complex	55275	0.269895	0.0228734	0.473733
ILMN_1753830	17	17q21.31	ETV4	ETS variant transcription factor 4	2118	0.269763	0.0388587	0.545858
ILMN_1663042	20	20q13.12	SDC4	syndecan 4	6385	0.269761	0.0198014	0.460661
ILMN_1702413	8	8q13.1	PPP1R42	protein phosphatase 1 regulatory subunit 42	286187	0.269441	0.039957	0.547913
ILMN_1811437	11	11q12.2	MYRF	myelin regulatory factor	745	0.269281	0.0408961	0.551617
ILMN_1780302	14	14q32.31	DYNC1H1	dynein cytoplasmic 1 heavy chain 1	1778	0.269092	0.0174382	0.455716
ILMN_1658369	4	4q24	TACR3	tachykinin receptor 3	6870	0.269044	0.0168398	0.454635
ILMN_1713985	8	8q24.3	MAF1	MAF1 homolog, negative regulator of RNA polymerase III	84232	0.2682	0.0277649	0.498553
ILMN_1691291	17	17q11.2	PIGS	phosphatidylinositol glycan anchor biosynthesis class S	94005	0.267809	0.012795	0.4237
ILMN_1780598	15	15q23	PIAS1	protein inhibitor of activated STAT 1	8554	0.267767	0.0287952	0.503914
ILMN_1799243	8	8q24.13	ANXA13	annexin A13	312	0.267696	0.0263248	0.491142
ILMN_1800634	16	16p13.3	NME4	NME/NM23 nucleoside diphosphate kinase 4	4833	0.267517	0.0172199	0.455716
ILMN_3296436	10	10p12.31	LOC100130992	uncharacterized LOC100130992	100130992	0.267449	0.0103373	0.393183
ILMN_1659215	1	1p33	CYP4B1	cytochrome P450 family 4 subfamily B member 1	1580	0.267156	0.0450319	0.561611
ILMN_3310376	5	5q34	MIR218-2	microRNA 218-2	407001	0.26689	0.019546	0.459175
ILMN_1678235	17	17q21.31	KANSL1	KAT8 regulatory NSL complex subunit 1	284058	0.266772	0.0225666	0.473733
ILMN_1728305	2	2p24.1	PUM2	pumilio RNA binding family member 2	23369	0.266767	0.00837072	0.376219
ILMN_1705064	17	17p13.1	NDEL1	nudE neurodevelopment protein 1 like 1	81565	0.266681	0.0410673	0.551722
ILMN_1811277	13	13q14.2	TRIM13	tripartite motif containing 13	10206	0.266581	0.0358239	0.535588
ILMN_1665686	18	18p11.22-p11.21	PIEZO2	piezo type mechanosensitive ion channel component 2	63895	0.266491	0.0311824	0.516448
ILMN_1684034	17	17q21.2	STAT5B	signal transducer and activator of transcription 5B	6777	0.266408	0.0488074	0.571369
ILMN_1662852	16	16p12.3	IQCK	IQ motif containing K	124152	0.266126	0.0379206	0.542658
ILMN_1673357	20	20q11.23	SLA2	Src like adaptor 2	84174	0.265941	0.0391671	0.545858
ILMN_1810716	5	5q31.2	GFRA3	GDNF family receptor alpha 3	2676	0.26579	0.0123947	0.422223
ILMN_2079225	4	4p16.1	OR7E85BP	olfactory receptor family 7 subfamily E member 85B pseudogene	650293	0.265739	0.0170156	0.455716
ILMN_3245591	14	14q32.31	DIO3OS	DIO3 opposite strand upstream RNA	64150	0.265193	0.0223423	0.473733
ILMN_1691705	19	19p12	ZNF98	zinc finger protein 98	148198	0.2645	0.035299	0.533735
ILMN_1658685	22	22q13.1	ELFN2	extracellular leucine rich repeat and fibronectin type III domain containing 2	114794	0.264465	0.0483736	0.57122
ILMN_1772540	16	16q23.2	ATMIN	ATM interactor	23300	0.264069	0.0481462	0.570605
ILMN_2203544	7	7q35	OR2A9P	olfactory receptor family 2 subfamily A member 9 pseudogene	441295	0.263667	0.00209672	0.269374
ILMN_1887174	8	8q11.21	SPIDR	scaffold protein involved in DNA repair	23514	0.263173	0.0224473	0.473733
ILMN_1673207	2	2p25.1	KLF11	Kruppel like factor 11	8462	0.263032	0.0308482	0.516448
ILMN_3305973	7	7p13	NACAD	NAC alpha domain containing	23148	0.262676	0.0287364	0.503914
ILMN_2391400	4	4q25	PITX2	paired like homeodomain 2	5308	0.262585	0.0225804	0.473733
ILMN_2391891	15	15q23	MAP2K5	mitogen-activated protein kinase kinase 5	5607	0.262298	0.0225504	0.473733
ILMN_1671489	11	11q13.2	PC	pyruvate carboxylase	5091	0.262187	0.020013	0.462928
ILMN_2393712	11	11q13.3	CTTN	cortactin	2017	0.262027	0.0186445	0.459175
ILMN_2214098	13	13q33.1	BIVM	basic, immunoglobulin-like variable motif containing	54841	0.262011	0.0172122	0.455716
ILMN_1739855	19	19q13.33	CGB7	chorionic gonadotropin subunit beta 7	94027	0.261992	0.017928	0.456982
ILMN_1660031	11	11q13.4	P2RY6	pyrimidinergic receptor P2Y6	5031	0.261924	0.0263075	0.491142
ILMN_1718303	19	19q13.32	NECTIN2	nectin cell adhesion molecule 2	5819	0.26175	0.0420311	0.553688
ILMN_1705907	6	6p22.3	NUP153	nucleoporin 153	9972	0.261607	0.0293653	0.506453
ILMN_2375973	14	14q24.3	ALKBH1	alkB homolog 1, histone H2A dioxygenase	8846	0.261339	0.0105683	0.393813
ILMN_1747744	5	5q14.1	LHFPL2	LHFPL tetraspan subfamily member 2	10184	0.26111	0.0322066	0.520922
ILMN_1726434	15	15q26.1	UNC45A	unc-45 myosin chaperone A	55898	0.261062	0.0396901	0.546503
ILMN_2391419	14	14q23.2	SYNE2	spectrin repeat containing nuclear envelope protein 2	23224	0.260965	0.0276446	0.49743
ILMN_1692198	7	7q11.23	GTF2IRD1	GTF2I repeat domain containing 1	9569	0.260729	0.023183	0.473733
ILMN_2366473	12	12p12.1	ABCC9	ATP binding cassette subfamily C member 9	10060	0.260718	0.022813	0.473733
ILMN_2406313	20	20p13	RBCK1	RANBP2-type and C3HC4-type zinc finger containing 1	10616	0.260437	0.0186861	0.459175
ILMN_3235718	22	22q11.23	GUSBP11	GUSB pseudogene 11	91316	0.260132	0.0329086	0.524595
ILMN_1712944	19	19p13.3	TLE5	TLE family member 5, transcriptional modulator	166	0.260123	0.0372717	0.540568
ILMN_1735415	16	16p13.3	NUDT16L1	nudix hydrolase 16 like 1	84309	0.260066	0.038517	0.545858
ILMN_2212590	16	16q23.1	TMEM170A	transmembrane protein 170A	124491	0.259666	0.0365938	0.537541
ILMN_1792506	3	3q13.33	PLA1A	phospholipase A1 member A	51365	0.259556	0.0146868	0.438013
ILMN_1807596	9	9p13.3	UBAP1	ubiquitin associated protein 1	51271	0.259533	0.0154641	0.448244
ILMN_1740170	22	22q11.23	CHCHD10	coiled-coil-helix-coiled-coil-helix domain containing 10	400916	0.259289	0.0450874	0.561611
ILMN_2351029	11	11q21	MTMR2	myotubularin related protein 2	8898	0.259213	0.0325671	0.523198
ILMN_1774211	3	3p22.3	TMPPE	transmembrane protein with metallophosphoesterase domain	643853	0.259172	0.032607	0.523244
ILMN_2345016	9	9q34.11	PTGES2	prostaglandin E synthase 2	80142	0.259162	0.02491	0.485471
ILMN_3249965	15	15q13.1	PDCD6IPP2	PDCD6IP pseudogene 2	646278	0.25906	0.0353358	0.533735
ILMN_1703142	19	19p13.2	MARCHF2	membrane associated ring-CH-type finger 2	51257	0.258846	0.0080957	0.375649
ILMN_1727271	14	14q32.2	WARS1	tryptophanyl-tRNA synthetase 1	7453	0.258754	0.0274652	0.496274
ILMN_1684492	3	3q25.31	LEKR1	leucine, glutamate and lysine rich 1	389170	0.258293	0.012798	0.4237
ILMN_1787556	7	7p13	NPC1L1	NPC1 like intracellular cholesterol transporter 1	29881	0.257992	0.0212981	0.470965
ILMN_1717485	4	4q23	C4orf54	chromosome 4 open reading frame 54	285556	0.257939	0.0192499	0.459175
ILMN_2302654	1	1p32.3	LRP8	LDL receptor related protein 8	7804	0.257769	0.0468625	0.565698
ILMN_2133675	17	17q25.3	SGSH	N-sulfoglucosamine sulfohydrolase	6448	0.257594	0.0387832	0.545858
ILMN_1775762	3	3p21.31	GNAI2	G protein subunit alpha i2	2771	0.257447	0.00588264	0.339761
ILMN_1805180	15	15q15.2	CDAN1	codanin 1	146059	0.257205	0.0411406	0.551722
ILMN_1721564	3	3p25.3	FANCD2OS	FANCD2 opposite strand	115795	0.257056	0.00511537	0.329169
ILMN_1662879	16	16p11.2	UBE2MP1	ubiquitin conjugating enzyme E2 M pseudogene 1	606551	0.257025	0.0257399	0.487987
ILMN_1798657	3	3q26.32	TBL1XR1	TBL1X receptor 1	79718	0.25702	0.0122525	0.419827
ILMN_1654032	9	9q34.11	ZER1	zyg-11 related cell cycle regulator	10444	0.256608	0.0474735	0.567647
ILMN_1772824	12	12p13.33	WNT5B	Wnt family member 5B	81029	0.256476	0.0336412	0.528863
ILMN_1695827	11	11q13.2	PPP1CA	protein phosphatase 1 catalytic subunit alpha	5499	0.256433	0.0220907	0.473733
ILMN_2288905	15	15q25.2	CPEB1	cytoplasmic polyadenylation element binding protein 1	64506	0.256289	0.0101409	0.392561
ILMN_1795218	3	3p21.31	DHX30	DExH-box helicase 30	22907	0.255823	0.0351309	0.533735
ILMN_1707748	22	22q13.33	PIM3	Pim-3 proto-oncogene, serine/threonine kinase	415116	0.255692	0.0411759	0.551722
ILMN_1806434	15	15q23	PAQR5	progestin and adipoQ receptor family member 5	54852	0.255446	0.0345931	0.532901
ILMN_1745522	4	4q13.3	PF4V1	platelet factor 4 variant 1	5197	0.25521	0.020712	0.46519
ILMN_3243135	18	18q21.2	SNORA37	small nucleolar RNA, H/ACA box 37	677819	0.255182	0.0119416	0.415455
ILMN_1789642	20	20q13.33	DNAJC5	DnaJ heat shock protein family (Hsp40) member C5	80331	0.255078	0.0242098	0.483167
ILMN_1730745	11	11p13	CCDC73	coiled-coil domain containing 73	493860	0.254853	0.0201236	0.462951
ILMN_3235101	2	2p13.3	LINC01816	long intergenic non-protein coding RNA 1816	100133985	0.254521	0.0216641	0.473615
ILMN_3187324	2	2p14	CNRIP1	cannabinoid receptor interacting protein 1	25927	0.254438	0.0388781	0.545858
ILMN_1685156	12	12q13.12	ADCY6	adenylate cyclase 6	112	0.254268	0.0392635	0.545858
ILMN_3246544	6	6q25.3	OSTCP1	oligosaccharyltransferase complex subunit pseudogene 1	202459	0.25419	0.0103781	0.393183
ILMN_1728199	12	12q24.33	POLE	DNA polymerase epsilon, catalytic subunit	5426	0.254043	0.0177288	0.456982
ILMN_3245116	3	3q26.2	GOLIM4	golgi integral membrane protein 4	27333	0.253967	0.0304522	0.514894
ILMN_1733511	12	12q24.33	GOLGA3	golgin A3	2802	0.253658	0.0412969	0.551983
ILMN_1670456	19	19q13.12	RBM42	RNA binding motif protein 42	79171	0.25358	0.0311435	0.516448
ILMN_1752027	12	12q24.11	UBE3B	ubiquitin protein ligase E3B	89910	0.25338	0.0220817	0.473733
ILMN_1718900	17	17q25.1	KCTD2	potassium channel tetramerization domain containing 2	23510	0.253326	0.0195014	0.459175
ILMN_1675501	3	3q29	SENP5	SUMO specific peptidase 5	205564	0.253132	0.0296518	0.508633
ILMN_1665964	11	11q14.1	GAB2	GRB2 associated binding protein 2	9846	0.253084	0.0397402	0.546503
ILMN_1707070	7	7q22.1	PCOLCE	procollagen C-endopeptidase enhancer	5118	0.252612	0.025993	0.489691
ILMN_1777638	7	7q35	OR2A2	olfactory receptor family 2 subfamily A member 2	442361	0.252246	0.0402277	0.548342
ILMN_1706779	19	19q13.33	LIG1	DNA ligase 1	3978	0.251911	0.0487485	0.57122
ILMN_2170515	9	9q34.11	NTMT1	N-terminal Xaa-Pro-Lys N-methyltransferase 1	28989	0.25185	0.0289499	0.503914
ILMN_1766222	10	10p15.3	LARP4B	La ribonucleoprotein 4B	23185	0.251421	0.0200134	0.462928
ILMN_1717294	9	9q31.3	PTPN3	protein tyrosine phosphatase non-receptor type 3	5774	0.25061	0.0376681	0.541554
ILMN_1710863	7	7q21.2	GATAD1	GATA zinc finger domain containing 1	57798	0.250344	0.0306646	0.515465
ILMN_3227023	9	9q34.3	SNHG7	small nucleolar RNA host gene 7	84973	0.250282	0.0152502	0.444436
ILMN_1665117	6	6p21.2	C6orf89	chromosome 6 open reading frame 89	221477	0.250247	0.0307823	0.516424
ILMN_2055036	14	14q21.3	KLHDC1	kelch domain containing 1	122773	0.250146	0.0350538	0.533735
ILMN_2352216	8	8q24.3	FBXL6	F-box and leucine rich repeat protein 6	26233	0.250093	0.0417076	0.553688
ILMN_1739532	17	17q11.2	DPRXP4	divergent-paired related homeobox pseudogene 4	503645	0.249862	0.0187878	0.459175
ILMN_1779558	13	13q34	GAS6	growth arrest specific 6	2621	0.249852	0.0313734	0.516543
ILMN_1713918	7	7p22.1	CYTH3	cytohesin 3	9265	0.249747	0.0186415	0.459175
ILMN_2082489	16	16q22.1	PRMT7	protein arginine methyltransferase 7	54496	0.249675	0.0273918	0.496036
ILMN_1813243	9	9q34.3	ANAPC2	anaphase promoting complex subunit 2	29882	0.249655	0.0184535	0.459175
ILMN_3245541	2	2p23.2	SNORD53	small nucleolar RNA, C/D box 53	26796	0.24901	0.0231672	0.473733
ILMN_2056932	17	17p13.1	SPEM1	spermatid maturation 1	374768	0.248849	0.0406867	0.550665
ILMN_1766425	X	Xp22.2	REPS2	RALBP1 associated Eps domain containing 2	9185	0.248674	0.0293856	0.506549
ILMN_1794539	10	10q23.33	KIF11	kinesin family member 11	3832	0.247791	0.0260289	0.4901
ILMN_2408663	1	1p36.11	RHCE	Rh blood group CcEe antigens	6006	0.247602	0.0248751	0.485316
ILMN_3251733	19	19p13.13	TRIR	telomerase RNA component interacting RNase	79002	0.247496	0.0208703	0.466316
ILMN_1811991	17	17q25.3	OGFOD3	2-oxoglutarate and iron dependent oxygenase domain containing 3	79701	0.247189	0.0161454	0.450067
ILMN_1678054	11	11p15.4	TRIM21	tripartite motif containing 21	6737	0.247087	0.0212576	0.470502
ILMN_1753287	19	19q13.2	DLL3	delta like canonical Notch ligand 3	10683	0.247034	0.0301555	0.51329
ILMN_1800713	21	21q22.2	B3GALT5	beta-1,3-galactosyltransferase 5	10317	0.246978	0.0104872	0.393813
ILMN_1669433	10	10q22.2	ZSWIM8	zinc finger SWIM-type containing 8	23053	0.246697	0.00650112	0.347493
ILMN_1668996	17	17p13.2	C1QBP	complement C1q binding protein	708	0.246635	0.00764349	0.36804
ILMN_2097858	14	14q24.3	CIPC	CLOCK interacting pacemaker	85457	0.24662	0.017243	0.455716
ILMN_1810488	1	1p34.2	NFYC	nuclear transcription factor Y subunit gamma	4802	0.246437	0.0222006	0.473733
ILMN_2046073	2	2q21.3	LCT	lactase	3938	0.246409	0.00420984	0.317908
ILMN_2125869	1	1q42.13	ACTA1	actin alpha 1, skeletal muscle	58	0.245855	0.00668885	0.351906
ILMN_1804117	11	11q13.1	FAM89B	family with sequence similarity 89 member B	23625	0.245608	0.0436143	0.557098
ILMN_1815169	22	22q12.3	MCM5	minichromosome maintenance complex component 5	4174	0.245604	0.0423596	0.553688
ILMN_2179837	11	11q13.1	BANF1	BAF nuclear assembly factor 1	8815	0.245573	0.0251299	0.486041
ILMN_1700791	6	6p21.33	EHMT2	euchromatic histone lysine methyltransferase 2	10919	0.244953	0.00898773	0.382545
ILMN_1665455	16	16p12.3	DCUN1D3	defective in cullin neddylation 1 domain containing 3	123879	0.244942	0.0314512	0.516682
ILMN_1701614	1	1q31.2	CDC73	cell division cycle 73	79577	0.244672	0.0363571	0.536579
ILMN_2078599	19	19p13.2	ACP5	acid phosphatase 5, tartrate resistant	54	0.244554	0.0455213	0.563111
ILMN_2350183	11	11p15.4	DENND2B	DENN domain containing 2B	6764	0.244411	0.00907525	0.382794
ILMN_1752340	7	7q32.1	ARF5	ADP ribosylation factor 5	381	0.244397	0.0161786	0.450179
ILMN_1793770	7	7q36.3	DNAJB6	DnaJ heat shock protein family (Hsp40) member B6	10049	0.244194	0.0202917	0.462951
ILMN_3238072	22	22q13.2	CHADL	chondroadherin like	150356	0.243967	0.0101659	0.392561
ILMN_1729167	15	15q25.2	EFL1	elongation factor like GTPase 1	79631	0.243449	0.037585	0.541261
ILMN_2386008	1	1q24.2	MPZL1	myelin protein zero like 1	9019	0.243188	0.014751	0.438031
ILMN_1788250	X	Xq27.1	LDOC1	LDOC1 regulator of NFKB signaling	23641	0.243004	0.0296461	0.508633
ILMN_2097793	17	17p13.1	ZBTB4	zinc finger and BTB domain containing 4	57659	0.242944	0.0463	0.565698
ILMN_3235326	20	20q11.23	SNHG17	small nucleolar RNA host gene 17	388796	0.242643	0.00869624	0.380471
ILMN_1674399	11	11p15.4	ZNF143	zinc finger protein 143	7702	0.242247	0.024651	0.483705
ILMN_1767523	3	3p21.1	IL17RB	interleukin 17 receptor B	55540	0.24212	0.0141016	0.437852
ILMN_1761560	1	1p36.31	PHF13	PHD finger protein 13	148479	0.241703	0.0234756	0.475805
ILMN_3260618	11	11p13	APIP	APAF1 interacting protein	51074	0.241507	0.0434441	0.557094
ILMN_1682738	15	15q22.33	SMAD3	SMAD family member 3	4088	0.241195	0.0312083	0.516448
ILMN_3204908	7	7p12.3	CDC14C	cell division cycle 14C	168448	0.241185	0.0220863	0.473733
ILMN_2237601	3	3q26.32	KCNMB2	potassium calcium-activated channel subfamily M regulatory beta subunit 2	10242	0.240829	0.00933988	0.387072
ILMN_1765446	19	19q13.33	EMP3	epithelial membrane protein 3	2014	0.239552	0.0154702	0.448244
ILMN_1673605	19	19p13.3	PRSS57	serine protease 57	400668	0.239424	0.0377907	0.542198
ILMN_1739792	11	11p15.4	RHOG	ras homolog family member G	391	0.239342	0.0361261	0.536515
ILMN_1712786	7	7q32.1	AHCYL2	adenosylhomocysteinase like 2	23382	0.239183	0.0467384	0.565698
ILMN_1814165	1	1p32.3	SSBP3	single stranded DNA binding protein 3	23648	0.23889	0.0298038	0.509933
ILMN_1734153	X	Xq28	GDI1	GDP dissociation inhibitor 1	2664	0.238874	0.0397392	0.546503
ILMN_2163835	8	8q13.3	PRDM14	PR/SET domain 14	63978	0.238855	0.0203517	0.462951
ILMN_2396571	19	19p13.3	GPR108	G protein-coupled receptor 108	56927	0.238822	0.0384707	0.545858
ILMN_1654392	14	14q12	KHNYN	KH and NYN domain containing	23351	0.238753	0.0255762	0.487341
ILMN_2381121	20	20q11.22	UQCC1	ubiquinol-cytochrome c reductase complex assembly factor 1	55245	0.238544	0.0362461	0.536579
ILMN_3308891	21	21q21.1	MIR99A	microRNA 99a	407055	0.238064	0.0248122	0.484935
ILMN_3240559	15	15q13.1	FAM189A1	family with sequence similarity 189 member A1	23359	0.23762	0.0422095	0.553688
ILMN_3246993	6	6p22.1	H2AC16	H2A clustered histone 16	8332	0.237594	0.0401018	0.548208
ILMN_1811921	1	1q32.1	CSRP1	cysteine and glycine rich protein 1	1465	0.237587	0.0180491	0.456982
ILMN_2367384	1	1p36.12	EPHB2	EPH receptor B2	2048	0.237505	0.0462978	0.565698
ILMN_1700541	22	22q13.31	FBLN1	fibulin 1	2192	0.237467	0.0271299	0.495147
ILMN_1785060	10	10q23.1	TSPAN14	tetraspanin 14	81619	0.237326	0.0178383	0.456982
ILMN_2412860	8	8q11.21	MCM4	minichromosome maintenance complex component 4	4173	0.237312	0.0102611	0.392561
ILMN_1807331	11	11q24.1	BLID	BH3-like motif containing, cell death inducer	414899	0.236979	0.0478973	0.569416
ILMN_2319910	12	12q13.2	DGKA	diacylglycerol kinase alpha	1606	0.236331	0.0367503	0.537783
ILMN_1715024	21	21q22.3	LSS	lanosterol synthase	4047	0.235848	0.00939354	0.387072
ILMN_2092693	17	17q21.31	LSM12	LSM12 homolog	124801	0.235644	0.0450068	0.561611
ILMN_2221076	17	17p13.2	NCBP3	nuclear cap binding subunit 3	55421	0.235578	0.0195639	0.459175
ILMN_2410975	2	2q35	ATG9A	autophagy related 9A	79065	0.235569	0.0468344	0.565698
ILMN_1674985	1	1p36.21	TMEM51	transmembrane protein 51	55092	0.235423	0.0280763	0.50002
ILMN_1687400	X	Xq28	MAGEA4	MAGE family member A4	4103	0.235413	0.015684	0.448998
ILMN_1753249	11	11q22.3	DDX10	DEAD-box helicase 10	1662	0.235184	0.0126786	0.423339
ILMN_1779615	10	10q22.3	EIF5AL1	eukaryotic translation initiation factor 5A like 1	143244	0.234972	0.0352251	0.533735
ILMN_1714327	16	16p11.2	SETD1A	SET domain containing 1A, histone lysine methyltransferase	9739	0.234918	0.0285372	0.503914
ILMN_2179717	9	9q21.12	FAM189A2	family with sequence similarity 189 member A2	9413	0.234825	0.015941	0.449686
ILMN_2313946	16	16q24.3	CPNE7	copine 7	27132	0.234617	0.0223115	0.473733
ILMN_1690389	12	12q13.11	OR10AD1	olfactory receptor family 10 subfamily AD member 1	121275	0.234352	0.0402077	0.548339
ILMN_1662886	X	Xp22.12	KLHL34	kelch like family member 34	257240	0.234273	0.0235581	0.477083
ILMN_1716480	16	16q22.1	ACD	ACD shelterin complex subunit and telomerase recruitment factor	65057	0.234248	0.0486534	0.57122
ILMN_1681503	3	3q21.3	MCM2	minichromosome maintenance complex component 2	4171	0.23416	0.0439417	0.559223
ILMN_1663486	17	17q23.2	TLK2	tousled like kinase 2	11011	0.234071	0.0159224	0.449686
ILMN_1682259	12	12p13.31	CLEC4C	C-type lectin domain family 4 member C	170482	0.23378	0.035758	0.535588
ILMN_1807600	17	17q25.3	NPLOC4	NPL4 homolog, ubiquitin recognition factor	55666	0.233698	0.0379261	0.542658
ILMN_2368585	22	22q11.23	GGT1	gamma-glutamyltransferase 1	2678	0.233285	0.035776	0.535588
ILMN_1656316	X	Xq13.1	ZMYM3	zinc finger MYM-type containing 3	9203	0.233265	0.0174759	0.455716
ILMN_2362556	7	7p14.2	TBX20	T-box transcription factor 20	57057	0.233081	0.0470201	0.566387
ILMN_1779381	10	10p14	SEC61A2	SEC61 translocon subunit alpha 2	55176	0.232728	0.013931	0.436624
ILMN_2367010	6	6q24.2	ADGRG6	adhesion G protein-coupled receptor G6	57211	0.232595	0.0326194	0.523244
ILMN_1800171	6	6q26	MAP3K4	mitogen-activated protein kinase kinase kinase 4	4216	0.232513	0.0286887	0.503914
ILMN_1729613	X	Xq23	TDGF1P3	teratocarcinoma-derived growth factor 1 pseudogene 3	6998	0.232132	0.0109406	0.398855
ILMN_1702775	11	11q13.2	LRP5	LDL receptor related protein 5	4041	0.231755	0.0253069	0.486422
ILMN_2145670	9	9q33.1	TNC	tenascin C	3371	0.231286	0.0288385	0.503914
ILMN_3200560	X	Xq22.1	ARMCX4	armadillo repeat containing X-linked 4	100131755	0.231248	0.0135439	0.430796
ILMN_2410771	19	19p13.2	KEAP1	kelch like ECH associated protein 1	9817	0.231093	0.0355884	0.535588
ILMN_1659306	10	10p11.23	SVIL	supervillin	6840	0.231057	0.0055208	0.333336
ILMN_3291578	12	12q24.11	LINC01405	long intergenic non-protein coding RNA 1405	100131138	0.230881	0.041632	0.553688
ILMN_3304219	12	12q13.3	RBMS2	RNA binding motif single stranded interacting protein 2	5939	0.23075	0.038503	0.545858
ILMN_1665583	6	6p21.33	TUBB	tubulin beta class I	203068	0.230727	0.0196867	0.46046
ILMN_3238221	16	16p13.3	FLJ42627	uncharacterized LOC645644	645644	0.230558	0.0242559	0.483167
ILMN_2373285	8	8p22	MSR1	macrophage scavenger receptor 1	4481	0.230479	0.0470749	0.566387
ILMN_3248505	7	7q22.1	COL26A1	collagen type XXVI alpha 1 chain	136227	0.230108	0.0350686	0.533735
ILMN_2374692	10	c("10p12.1", "10p12.1-p11.2")	WAC	WW domain containing adaptor with coiled-coil	51322	0.230072	0.0457108	0.563717
ILMN_1742318	11	11q13.4	RNF121	ring finger protein 121	55298	0.229684	0.0406449	0.550665
ILMN_3246962	22	22q11.23	SPECC1L	sperm antigen with calponin homology and coiled-coil domains 1 like	23384	0.229071	0.0421012	0.553688
ILMN_3249032	2	2p21	EPCAM	epithelial cell adhesion molecule	4072	0.228961	0.0411758	0.551722
ILMN_1798327	3	3q23	PAQR9	progestin and adipoQ receptor family member 9	344838	0.228296	0.0157742	0.449686
ILMN_1751328	8	8q24.3	FAM83H	family with sequence similarity 83 member H	286077	0.228291	0.0380048	0.542998
ILMN_3234828	14	14q24.1	TMEM229B	transmembrane protein 229B	161145	0.228174	0.0433759	0.557094
ILMN_1779032	1	1q23.3	SDHC	succinate dehydrogenase complex subunit C	6391	0.228082	0.0462712	0.565698
ILMN_1662492	5	5p13.2	GDNF	glial cell derived neurotrophic factor	2668	0.227817	0.022662	0.473733
ILMN_1693428	20	20q13.12	TNNC2	troponin C2, fast skeletal type	7125	0.227748	0.0480062	0.569988
ILMN_2350421	19	19p13.3	CACTIN	cactin, spliceosome C complex subunit	58509	0.227578	0.0193993	0.459175
ILMN_1752802	5	5p15.33	CLPTM1L	CLPTM1 like	81037	0.227129	0.0265728	0.491142
ILMN_1746578	20	20p13	SLC23A2	solute carrier family 23 member 2	9962	0.226819	0.018166	0.456982
ILMN_2046003	10	10q25.2	ZDHHC6	zinc finger DHHC-type palmitoyltransferase 6	64429	0.226799	0.0118243	0.415455
ILMN_3289499	14	14q23.3	TEX21P	testis expressed 21, pseudogene	441687	0.226608	0.00824732	0.376151
ILMN_1696189	3	3q25.31	KCNAB1	potassium voltage-gated channel subfamily A member regulatory beta subunit 1	7881	0.225993	0.027917	0.49898
ILMN_2396702	6	6q16.3	GRIK2	glutamate ionotropic receptor kainate type subunit 2	2898	0.225749	0.0322139	0.520922
ILMN_2300664	22	22q13.1	CACNA1I	calcium voltage-gated channel subunit alpha1 I	8911	0.225706	0.0401967	0.548339
ILMN_1812545	22	22q13.1	DMC1	DNA meiotic recombinase 1	11144	0.225532	0.0483943	0.57122
ILMN_1765851	16	16q22.1	TRADD	TNFRSF1A associated via death domain	8717	0.225261	0.0486312	0.57122
ILMN_1770515	8	8q11.21	UBE2V2	ubiquitin conjugating enzyme E2 V2	7336	0.22512	0.0490629	0.571795
ILMN_1745798	13	13q14.12-q14.13	GTF2F2	general transcription factor IIF subunit 2	2963	0.224762	0.0189696	0.459175
ILMN_1681304	13	13q12.2	PAN3	poly(A) specific ribonuclease subunit PAN3	255967	0.22469	0.0392292	0.545858
ILMN_1716056	22	22q13.33	LMF2	lipase maturation factor 2	91289	0.224345	0.0446183	0.560895
ILMN_1717138	1	1p36.22	CLSTN1	calsyntenin 1	22883	0.224053	0.0224623	0.473733
ILMN_1729319	16	16p13.2	USP7	ubiquitin specific peptidase 7	7874	0.223809	0.0272732	0.496013
ILMN_1697967	2	2q37.1	UGT1A4	UDP glucuronosyltransferase family 1 member A4	54657	0.222615	0.0485465	0.57122
ILMN_1693598	2	2p16.1	RTN4	reticulon 4	57142	0.222576	0.0350418	0.533735
ILMN_2370208	16	16q22.1	CMTM3	CKLF like MARVEL transmembrane domain containing 3	123920	0.222558	0.0203653	0.462951
ILMN_1739450	17	17q21.32	NFE2L1	nuclear factor, erythroid 2 like 1	4779	0.222244	0.0477222	0.568638
ILMN_2227248	1	1q23.2	SLAMF9	SLAM family member 9	89886	0.22215	0.0397379	0.546503
ILMN_1798172	14	14q12	IPO4	importin 4	79711	0.22169	0.0248004	0.484935
ILMN_2094776	3	3q25.31	CCNL1	cyclin L1	57018	0.221669	0.0448667	0.561385
ILMN_1659444	1	1p36.22	KIF1B	kinesin family member 1B	23095	0.221593	0.0457895	0.564202
ILMN_1658301	19	19q13.33	FAM83E	family with sequence similarity 83 member E	54854	0.220342	0.0181017	0.456982
ILMN_1690653	11	11q13.2	CDK2AP2	cyclin dependent kinase 2 associated protein 2	10263	0.22012	0.024557	0.48351
ILMN_1707350	9	9p21.2	TUSC1	tumor suppressor candidate 1	286319	0.219812	0.0374911	0.54104
ILMN_1707312	9	9q22.31	NFIL3	nuclear factor, interleukin 3 regulated	4783	0.219707	0.0213376	0.470965
ILMN_1812620	8	8q11.22-q11.23	PXDNL	peroxidasin like	137902	0.21964	0.0229765	0.473733
ILMN_2403896	22	22q11.22	GGTLC2	gamma-glutamyltransferase light chain 2	91227	0.219511	0.026539	0.491142
ILMN_1655137	1	1p32.3	TUT4	terminal uridylyl transferase 4	23318	0.219169	0.0175129	0.455716
ILMN_2407589	18	18q23	CTDP1	CTD phosphatase subunit 1	9150	0.219069	0.0493664	0.572303
ILMN_1670383	4	4p15.1	PCDH7	protocadherin 7	5099	0.219019	0.0109443	0.398855
ILMN_1713125	X	Xq27.2	SPANXD	SPANX family member D	64648	0.218885	0.0444787	0.560328
ILMN_1763657	4	4q24	CXXC4	CXXC finger protein 4	80319	0.218787	0.0105538	0.393813
ILMN_1660999	18	18q12.1	WBP11P1	WBP11 pseudogene 1	441818	0.217986	0.0373487	0.540568
ILMN_1790973	20	20p12.3	CDS2	CDP-diacylglycerol synthase 2	8760	0.217786	0.00968959	0.388907
ILMN_2069912	X	Xq28	MAGEA8	MAGE family member A8	4107	0.217726	0.0493426	0.572303
ILMN_2318638	18	18p11.31	TGIF1	TGFB induced factor homeobox 1	7050	0.217597	0.0210258	0.468575
ILMN_1805952	10	10q11.22	SYT15	synaptotagmin 15	83849	0.216805	0.0477201	0.568638
ILMN_2047206	18	18q22.1	TMX3	thioredoxin related transmembrane protein 3	54495	0.216665	0.0414581	0.552719
ILMN_2111739	15	15q24.2	MAN2C1	mannosidase alpha class 2C member 1	4123	0.216336	0.0498116	0.574317
ILMN_1772798	15	15q21.2	ARPP19	cAMP regulated phosphoprotein 19	10776	0.2163	0.0405436	0.550646
ILMN_3249050	Y	Yp11.2	TTTY1B	testis-specific transcript, Y-linked 1B	100101116	0.216298	0.0242781	0.483167
ILMN_1676005	3	3q21.1	KPNA1	karyopherin subunit alpha 1	3836	0.216176	0.00990683	0.391067
ILMN_1737635	5	5p13.2	RAD1	RAD1 checkpoint DNA exonuclease	5810	0.215997	0.0255997	0.487341
ILMN_1728894	11	11q11	OR4A5	olfactory receptor family 4 subfamily A member 5	81318	0.215991	0.0471478	0.566387
ILMN_1671693	18	18q12.2	TPGS2	tubulin polyglutamylase complex subunit 2	25941	0.215968	0.0396351	0.546503
ILMN_2373137	9	9q34.3	AJM1	apical junction component 1 homolog	389813	0.215919	0.0399858	0.547913
ILMN_1737163	1	1p36.11	SH3BGRL3	SH3 domain binding glutamate rich protein like 3	83442	0.215857	0.0436778	0.557098
ILMN_1684158	16	16q11.2	GPT2	glutamic--pyruvic transaminase 2	84706	0.21576	0.0239283	0.480183
ILMN_1802380	1	1p36.23	RERE	arginine-glutamic acid dipeptide repeats	473	0.215649	0.0341231	0.532084
ILMN_1708646	9	9q21.11	LOC642929	general transcription factor II, i pseudogene	642929	0.215522	0.0291576	0.505145
ILMN_1752914	3	3q13.32-q13.33	ARHGAP31	Rho GTPase activating protein 31	57514	0.215277	0.0470948	0.566387
ILMN_3249608	12	12q24.33	ANKLE2	ankyrin repeat and LEM domain containing 2	23141	0.214902	0.0492937	0.572303
ILMN_1687481	19	19q13.32	HIF3A	hypoxia inducible factor 3 subunit alpha	64344	0.214712	0.0490568	0.571795
ILMN_1798885	X	Xp11.23	SLC35A2	solute carrier family 35 member A2	7355	0.214616	0.0485388	0.57122
ILMN_3225534	7	7p22.1	RNF216P1	ring finger protein 216 pseudogene 1	441191	0.214365	0.0344361	0.532646
ILMN_1673455	1	1q25.2	RASAL2	RAS protein activator like 2	9462	0.214364	0.0160155	0.449686
ILMN_1740487	3	3p22.3	CMTM7	CKLF like MARVEL transmembrane domain containing 7	112616	0.214196	0.042095	0.553688
ILMN_2391141	15	15q11.2	UBE3A	ubiquitin protein ligase E3A	7337	0.213735	0.0179368	0.456982
ILMN_1674563	17	17q12	CCL4	C-C motif chemokine ligand 4	6351	0.213431	0.0388653	0.545858
ILMN_1656840	1	1p36.22-p36.21	VPS13D	vacuolar protein sorting 13 homolog D	55187	0.213367	0.0419917	0.553688
ILMN_1729225	4	4p16.1	SORCS2	sortilin related VPS10 domain containing receptor 2	57537	0.213194	0.0287713	0.503914
ILMN_1798971	2	2q33.3	FZD5	frizzled class receptor 5	7855	0.212968	0.0328841	0.524595
ILMN_1656818	7	7p14.1	GPR141	G protein-coupled receptor 141	353345	0.212894	0.0414133	0.552541
ILMN_1799103	20	20p13	SNRPB	small nuclear ribonucleoprotein polypeptides B and B1	6628	0.212804	0.0181033	0.456982
ILMN_3202976	10	10q24.1	FRAT1	FRAT regulator of WNT signaling pathway 1	10023	0.212651	0.031038	0.516448
ILMN_1811890	10	10q26.11	RGS10	regulator of G protein signaling 10	6001	0.2125	0.0309874	0.516448
ILMN_1768117	14	14q24.2	RBM25	RNA binding motif protein 25	58517	0.212342	0.0229635	0.473733
ILMN_1686804	9	9q22.1	CDK20	cyclin dependent kinase 20	23552	0.211933	0.0400112	0.548044
ILMN_1656208	14	14q32.31	HSP90AA1	heat shock protein 90 alpha family class A member 1	3320	0.211905	0.0341578	0.532084
ILMN_2367258	20	20p13	SMOX	spermine oxidase	54498	0.211129	0.0246661	0.483726
ILMN_2281502	2	2q31.1	DHRS9	dehydrogenase/reductase 9	10170	0.210914	0.0424308	0.553688
ILMN_1714433	1	1p35.1	MARCKSL1	MARCKS like 1	65108	0.210583	0.0252747	0.486422
ILMN_1662482	1	1p21.3-p21.2	PLPPR4	phospholipid phosphatase related 4	9890	0.209807	0.0485391	0.57122
ILMN_1712141	10	10q23.31	LIPK	lipase family member K	643414	0.209015	0.046837	0.565698
ILMN_1768470	3	3q27.1	EIF4G1	eukaryotic translation initiation factor 4 gamma 1	1981	0.208481	0.0289205	0.503914
ILMN_1763371	9	9q32	RGS3	regulator of G protein signaling 3	5998	0.208323	0.0217716	0.473733
ILMN_1670144	19	19p13.12	OR10H2	olfactory receptor family 10 subfamily H member 2	26538	0.20829	0.049992	0.574609
ILMN_1803483	1	1p36.22	KIAA2013	KIAA2013	90231	0.208085	0.0396994	0.546503
ILMN_1762871	14	14q11.2	RNASE13	ribonuclease A family member 13 (inactive)	440163	0.207998	0.0279844	0.499375
ILMN_1663925	1	1q44	OR2L1P	olfactory receptor family 2 subfamily L member 1 pseudogene	26247	0.207557	0.0154	0.447697
ILMN_1751028	11	11q13.5	SERPINH1	serpin family H member 1	871	0.206273	0.036133	0.536515
ILMN_1663816	2	2q24.1	CCDC148	coiled-coil domain containing 148	130940	0.205868	0.0306952	0.515465
ILMN_1724959	4	4q21.22	SEC31A	SEC31 homolog A, COPII coat complex component	22872	0.205631	0.0428599	0.555302
ILMN_3258628	17	17p13.3	INPP5K	inositol polyphosphate-5-phosphatase K	51763	0.205462	0.0345611	0.532646
ILMN_2067444	19	19p13.3	ONECUT3	one cut homeobox 3	390874	0.205456	0.0424077	0.553688
ILMN_1680132	11	11q23.3	CADM1	cell adhesion molecule 1	23705	0.204859	0.0187677	0.459175
ILMN_1652085	2	2p13.3	MPHOSPH10	M-phase phosphoprotein 10	10199	0.204756	0.0302787	0.513835
ILMN_1788099	19	19p13.11	LSM4	LSM4 homolog, U6 small nuclear RNA and mRNA degradation associated	25804	0.20455	0.0331686	0.526161
ILMN_3248263	2	2q14.1	CCDC93	coiled-coil domain containing 93	54520	0.204152	0.0349791	0.533735
ILMN_1703866	19	19q13.2	SUPT5H	SPT5 homolog, DSIF elongation factor subunit	6829	0.204072	0.0401446	0.548332
ILMN_2349992	7	7p22.1	PMS2CL	PMS2 C-terminal like pseudogene	441194	0.203568	0.0229856	0.473733
ILMN_1753500	10	10p11.22	ARHGAP12	Rho GTPase activating protein 12	94134	0.203506	0.0423723	0.553688
ILMN_1731699	14	14q23.3	RAB15	RAB15, member RAS oncogene family	376267	0.203313	0.0295701	0.508633
ILMN_2354287	4	4q34.1	GLRA3	glycine receptor alpha 3	8001	0.202863	0.0349846	0.533735
ILMN_1708991	10	10p11.21	CCNY	cyclin Y	219771	0.20271	0.02148	0.471985
ILMN_1683761	X	Xq26.3	CT55	cancer/testis antigen 55	54967	0.202595	0.0432682	0.556809
ILMN_1687922	7	7p14.3	RP9	RP9 pre-mRNA splicing factor	6100	0.202237	0.034484	0.532646
ILMN_1777040	15	15q11.2	GOLGA8IP	golgin A8 family member I, pseudogene	283796	0.201971	0.0183866	0.459027
ILMN_2087702	22	22q12.3	MYH9	myosin heavy chain 9	4627	0.20197	0.0244127	0.483167
ILMN_1803744	15	15q26.3	SELENOS	selenoprotein S	55829	0.201427	0.0365064	0.537147
ILMN_1671933	1	1p13.3	GPSM2	G protein signaling modulator 2	29899	0.200977	0.0165311	0.452579
ILMN_2217574	7	7q36.1	FABP5P3	fatty acid binding protein 5 pseudogene 3	220832	0.200353	0.0251018	0.486041
ILMN_3266294	5	5q12.3	SREK1IP1	SREK1 interacting protein 1	285672	0.199978	0.0155231	0.448244
ILMN_1654370	1	1p34.1	TESK2	testis associated actin remodelling kinase 2	10420	0.199625	0.0361451	0.536515
ILMN_1666546	17	17q12	DUSP14	dual specificity phosphatase 14	11072	0.199533	0.0389599	0.545858
ILMN_3236637	10	10p12.2	PIP4K2A	phosphatidylinositol-5-phosphate 4-kinase type 2 alpha	5305	0.199217	0.0417966	0.553688
ILMN_1696921	6	6q25.1	LATS1	large tumor suppressor kinase 1	9113	0.199084	0.0370984	0.539892
ILMN_1843198	1	1p31.3	AK4	adenylate kinase 4	205	0.198159	0.0494535	0.572303
ILMN_1748903	1	1p36.11	LIN28A	lin-28 homolog A	79727	0.196689	0.0213805	0.471
ILMN_1782257	14	14q11.2	METTL17	methyltransferase like 17	64745	0.196649	0.044768	0.561385
ILMN_1673711	6	6p21.1	HSP90AB1	heat shock protein 90 alpha family class B member 1	3326	0.196572	0.0344422	0.532646
ILMN_1811624	2	2p21	THADA	THADA armadillo repeat containing	63892	0.196308	0.0442391	0.560198
ILMN_2065783	6	6p25.3	EXOC2	exocyst complex component 2	55770	0.195686	0.0386235	0.545858
ILMN_1693781	12	12p13.31	CLEC2D	C-type lectin domain family 2 member D	29121	0.195431	0.0366117	0.537542
ILMN_2182348	10	10q25.2	SMC3	structural maintenance of chromosomes 3	9126	0.195288	0.047489	0.567647
ILMN_1653376	2	2q32.1	FAM171B	family with sequence similarity 171 member B	165215	0.195024	0.0499409	0.574609
ILMN_1808217	2	2q31.3-q32.1	PPP1R1C	protein phosphatase 1 regulatory inhibitor subunit 1C	151242	0.194208	0.0449935	0.561611
ILMN_3243238	16	16p13.3	TPSB2	tryptase beta 2	64499	0.193725	0.0391022	0.545858
ILMN_1791067	9	9p13.3	TESK1	testis associated actin remodelling kinase 1	7016	0.193321	0.0301322	0.51329
ILMN_1704173	22	22q11.21	AIFM3	apoptosis inducing factor mitochondria associated 3	150209	0.193291	0.046685	0.565698
ILMN_2204526	1	1p34.1	TCTEX1D4	Tctex1 domain containing 4	343521	0.193034	0.0305991	0.515465
ILMN_2109197	18	18p11.31	EPB41L3	erythrocyte membrane protein band 4.1 like 3	23136	0.192357	0.021551	0.472204
ILMN_1712684	7	7p22.3	FAM20C	FAM20C golgi associated secretory pathway kinase	56975	0.191991	0.0286919	0.503914
ILMN_2174275	Y	Yp11.2	RBMY1A3P	RNA binding motif protein Y-linked family 1 member A3, pseudogene	286557	0.191389	0.0378073	0.542198
ILMN_1705114	14	14q24.2-q24.3	NUMB	NUMB endocytic adaptor protein	8650	0.191163	0.0380579	0.54353
ILMN_1736654	9	9q21.11	PIP5K1B	phosphatidylinositol-4-phosphate 5-kinase type 1 beta	8395	0.191078	0.0473415	0.567282
ILMN_1716909	8	8p21.2	ADAMDEC1	ADAM like decysin 1	27299	0.190473	0.0488738	0.571565
ILMN_1673590	7	7q21.3	BHLHA15	basic helix-loop-helix family member a15	168620	0.190418	0.0498855	0.574551
ILMN_3230853	10	10p13	BEND7	BEN domain containing 7	222389	0.189947	0.0440786	0.559557
ILMN_1722894	6	6p22.1	POLR1H	RNA polymerase I subunit H	30834	0.189779	0.0334134	0.527938
ILMN_3310735	9	9p21.1	MIR873	microRNA 873	100126316	0.189599	0.020987	0.468316
ILMN_1703477	1	1q22	ARHGEF2	Rho/Rac guanine nucleotide exchange factor 2	9181	0.188271	0.0280331	0.499725
ILMN_1801146	12	12q24.33	MMP17	matrix metallopeptidase 17	4326	0.187796	0.0288156	0.503914
ILMN_1790891	12	12q23.3	CKAP4	cytoskeleton associated protein 4	10970	0.187316	0.0424744	0.554047
ILMN_1732923	1	1q42.2	SIPA1L2	signal induced proliferation associated 1 like 2	57568	0.187279	0.0400731	0.548208
ILMN_2268855	14	14q32.33	BAG5	BAG cochaperone 5	9529	0.187183	0.0495005	0.572485
ILMN_1720965	6	6q25.3	TULP4	TUB like protein 4	56995	0.186844	0.0432956	0.556809
ILMN_1694305	X	Xp22.11	SMS	spermine synthase	6611	0.186822	0.0396895	0.546503
ILMN_1807234	19	19p13.2	ZNF700	zinc finger protein 700	90592	0.186244	0.0449152	0.561456
ILMN_1728984	12	12q13.2	PA2G4	proliferation-associated 2G4	5036	0.18569	0.0389842	0.545858
ILMN_3300604	10	10q11.21	ZNF37BP	zinc finger protein 37B, pseudogene	100129482	0.185376	0.0440605	0.559557
ILMN_1820389	2	2q11.2	LONRF2	LON peptidase N-terminal domain and ring finger 2	164832	0.185331	0.0406301	0.550665
ILMN_3199590	18	18q21.1	MYO5B	myosin VB	4645	0.185269	0.0420834	0.553688
ILMN_2193706	12	12q24.22	HRK	harakiri, BCL2 interacting protein	8739	0.185042	0.0453106	0.562119
ILMN_2415189	1	1p13.1	ATP1A1	ATPase Na+/K+ transporting subunit alpha 1	476	0.184599	0.0483645	0.57122
ILMN_1804327	11	11p15.4	NAP1L4	nucleosome assembly protein 1 like 4	4676	0.182569	0.0455877	0.563332
ILMN_1661714	1	1p35.1	ZBTB8A	zinc finger and BTB domain containing 8A	653121	0.182461	0.0263701	0.491142
ILMN_1752502	10	10q22.1	HKDC1	hexokinase domain containing 1	80201	0.181504	0.0434536	0.557094
ILMN_1651708	2	2q35	RESP18	regulated endocrine specific protein 18	389075	0.179997	0.0472227	0.566387
ILMN_1672496	9	9p21.1	DNAJA1	DnaJ heat shock protein family (Hsp40) member A1	3301	0.179692	0.0202155	0.462951
ILMN_1687941	4	4p16.3	RNF4	ring finger protein 4	6047	0.179256	0.0490641	0.571795
ILMN_1698753	6	6q16.2	PRDM13	PR/SET domain 13	59336	0.178736	0.0435801	0.557098
ILMN_1713990	7	7q22.1	TRIP6	thyroid hormone receptor interactor 6	7205	0.178411	0.0252002	0.486179
ILMN_1733831	1	1q42.13	PGBD5	piggyBac transposable element derived 5	79605	0.177405	0.0253814	0.486592
ILMN_1672589	15	15q26.1	SEMA4B	semaphorin 4B	10509	0.176815	0.048838	0.571534
ILMN_1716060	12	12p13.33	ERC1	ELKS/RAB6-interacting/CAST family member 1	23085	0.176808	0.0448594	0.561385
ILMN_2138801	3	3q28	TP63	tumor protein p63	8626	0.176568	0.0389881	0.545858
ILMN_1888359	4	4q22.3	BMPR1B	bone morphogenetic protein receptor type 1B	658	0.176528	0.0338639	0.53005
ILMN_1737425	11	11q13.4	DEFB108B	defensin beta 108B	245911	0.176405	0.0408716	0.551617
ILMN_2251664	1	1p36.13	SLC66A1	solute carrier family 66 member 1	54896	0.175074	0.0346264	0.533074
ILMN_1723398	15	15q22.31	CSNK1G1	casein kinase 1 gamma 1	53944	0.173888	0.0302375	0.51353
ILMN_2197846	2	2p23.3	HADHB	hydroxyacyl-CoA dehydrogenase trifunctional multienzyme complex subunit beta	3032	0.173661	0.0378645	0.542482
ILMN_3249054	1	1p36.21	PRAMEF10	PRAME family member 10	343071	0.173414	0.0359438	0.535812
ILMN_2156699	14	14q24.3	ACOT6	acyl-CoA thioesterase 6	641372	0.172022	0.0399727	0.547913
ILMN_3240451	7	7p21.3	VWDE	von Willebrand factor D and EGF domains	221806	0.171816	0.0338278	0.530042
ILMN_1705753	3	3q12.1	CMSS1	cms1 ribosomal small subunit homolog	84319	0.171031	0.0417667	0.553688
ILMN_1676041	5	5q35.3	ZFP62	ZFP62 zinc finger protein	643836	0.169814	0.0406005	0.550646
ILMN_2394210	6	6p21.31	SLC26A8	solute carrier family 26 member 8	116369	0.169394	0.0425653	0.554449
ILMN_2190069	6	6p12.3	DEFB110	defensin beta 110	245913	0.166991	0.0370365	0.539447
ILMN_2161820	11	11q12.1	GLYATL2	glycine-N-acyltransferase like 2	219970	0.166488	0.0466402	0.565698
ILMN_2276688	11	11q23.1	DIXDC1	DIX domain containing 1	85458	0.166479	0.0361925	0.536515
ILMN_1745765	8	8q12.2-q12.3	CLVS1	clavesin 1	157807	0.160829	0.0276291	0.497411
ILMN_1734655	7	7q36.1	ATG9B	autophagy related 9B	285973	0.156308	0.0453941	0.562548
ILMN_1731213	10	10q25.2	TECTB	tectorin beta	6975	0.154656	0.0492558	0.572303
ILMN_1712950	17	17p13.2	PFN1	profilin 1	5216	0.154259	0.0477026	0.568638
ILMN_1793413	22	22q11.21	MICAL3	microtubule associated monooxygenase, calponin and LIM domain containing 3	57553	0.153055	0.0494674	0.572303
ILMN_3309604	19	19q13.32	MIR769	microRNA 769	768217	0.143318	0.0472279	0.566387
ILMN_1723407	14	14q23.2	LINC00643	long intergenic non-protein coding RNA 643	646113	-0.150951	0.0466893	0.565698
ILMN_1666399	6	6p21.32	RING1	ring finger protein 1	6015	-0.153755	0.0405962	0.550646
ILMN_1679941	17	c("17q21.31", "17q21")	DBF4B	DBF4 zinc finger B	80174	-0.159045	0.0494349	0.572303
ILMN_1660086	16	16p13.11	MYH11	myosin heavy chain 11	4629	-0.159838	0.0422726	0.553688
ILMN_1708890	10	10q11.21	RASSF4	Ras association domain family member 4	83937	-0.163208	0.0461071	0.564886
ILMN_1745103	12	12p13.31-p13.2	CLEC1B	C-type lectin domain family 1 member B	51266	-0.163862	0.0469705	0.566387
ILMN_1663062	11	11q21	DEUP1	deuterosome assembly protein 1	159989	-0.166188	0.0325559	0.523198
ILMN_1789990	20	20q13.13	ARFGEF2	ADP ribosylation factor guanine nucleotide exchange factor 2	10564	-0.1678	0.0409542	0.551722
ILMN_1805802	12	12q21.31	MYF6	myogenic factor 6	4618	-0.168147	0.0388819	0.545858
ILMN_1729691	17	17q24.2	SLC16A6	solute carrier family 16 member 6	9120	-0.168406	0.0392842	0.545858
ILMN_2062714	14	14q22.1	PTGDR	prostaglandin D2 receptor	5729	-0.169787	0.0480107	0.569988
ILMN_2134416	3	3p14.3	DNAH12	dynein axonemal heavy chain 12	201625	-0.170073	0.0259371	0.48918
ILMN_1669189	1	1q32.1	RASSF5	Ras association domain family member 5	83593	-0.17036	0.0419021	0.553688
ILMN_1654685	5	5q15	MCTP1	multiple C2 and transmembrane domain containing 1	79772	-0.173557	0.0453561	0.562481
ILMN_3234441	11	11q14.3	TRIM53AP	tripartite motif containing 53A, pseudogene	642569	-0.174041	0.0398049	0.546956
ILMN_1709719	1	1p22.3	LPAR3	lysophosphatidic acid receptor 3	23566	-0.174913	0.0473274	0.567282
ILMN_2204576	4	4q22.1	HSD17B13	hydroxysteroid 17-beta dehydrogenase 13	345275	-0.175134	0.0420783	0.553688
ILMN_2381286	X	Xp21.2-p21.1	DMD	dystrophin	1756	-0.175802	0.0392975	0.545858
ILMN_2145490	15	15q24.1	REC114	REC114 meiotic recombination protein	283677	-0.176665	0.030321	0.514189
ILMN_1760955	1	1q44	C1orf100	chromosome 1 open reading frame 100	200159	-0.177483	0.0428724	0.555302
ILMN_1789750	X	Xp11.3	ZNF41	zinc finger protein 41	7592	-0.179417	0.037635	0.541303
ILMN_1704094	14	14q13.2	PSMA6	proteasome 20S subunit alpha 6	5687	-0.1799	0.0463368	0.565698
ILMN_1758619	2	2q37.1	SAG	S-antigen visual arrestin	6295	-0.180546	0.0444674	0.560328
ILMN_1668152	2	2p23.3	FAM228A	family with sequence similarity 228 member A	653140	-0.180772	0.0384744	0.545858
ILMN_3248966	2	2q23.2	MMADHC	metabolism of cobalamin associated D	27249	-0.181449	0.0410751	0.551722
ILMN_1705352	6	6q16.1	FUT9	fucosyltransferase 9	10690	-0.182938	0.0362868	0.536579
ILMN_2364674	11	11q13.1	TRPT1	tRNA phosphotransferase 1	83707	-0.183778	0.0460829	0.564807
ILMN_3272441	12	12q21.31	PTPRQ	protein tyrosine phosphatase receptor type Q	374462	-0.18442	0.0284674	0.503914
ILMN_1748765	17	17q11.2	NOS2	nitric oxide synthase 2	4843	-0.184507	0.0272785	0.496013
ILMN_1668986	5	5q32	PRELID2	PRELI domain containing 2	153768	-0.18468	0.0353114	0.533735
ILMN_1791226	17	17p13.3	NXN	nucleoredoxin	64359	-0.184832	0.0328568	0.524595
ILMN_1712487	1	1q32.1	EIF2D	eukaryotic translation initiation factor 2D	1939	-0.184839	0.0418193	0.553688
ILMN_1688631	22	22q12.3	APOL1	apolipoprotein L1	8542	-0.185301	0.0411491	0.551722
ILMN_1753903	X	Xq24	C1GALT1C1	C1GALT1 specific chaperone 1	29071	-0.185831	0.0337828	0.530042
ILMN_2353023	17	17p11.2	GRAP	GRB2 related adaptor protein	10750	-0.185972	0.0253257	0.486422
ILMN_3192203	7	7q33	CREB3L2-AS1	CREB3L2 antisense RNA 1	100130880	-0.186112	0.0448436	0.561385
ILMN_2255310	16	16p12.3	RPS15A	ribosomal protein S15a	6210	-0.186228	0.0457476	0.563887
ILMN_1670139	X	Xq28	TEX28	testis expressed 28	1527	-0.186383	0.0498457	0.574359
ILMN_3244940	16	16p13.3	SNORA78	small nucleolar RNA, H/ACA box 78	677844	-0.186525	0.0490463	0.571795
ILMN_1710993	1	1q23.3	SPATA46	spermatogenesis associated 46	284680	-0.187144	0.0189141	0.459175
ILMN_1696223	13	13q14.3	ATP7B	ATPase copper transporting beta	540	-0.187388	0.0466955	0.565698
ILMN_3225525	19	19p12	ZNF726	zinc finger protein 726	730087	-0.187739	0.0422186	0.553688
ILMN_1673591	7	7q22.1	CYP3A43	cytochrome P450 family 3 subfamily A member 43	64816	-0.18819	0.0150587	0.442479
ILMN_1652913	7	7q36.1	EZH2	enhancer of zeste 2 polycomb repressive complex 2 subunit	2146	-0.188204	0.049076	0.571795
ILMN_1807728	14	14q12	LINC01551	long intergenic non-protein coding RNA 1551	387978	-0.188752	0.0230297	0.473733
ILMN_2038774	6	6q13	EEF1A1	eukaryotic translation elongation factor 1 alpha 1	1915	-0.188833	0.0124871	0.423307
ILMN_2383290	9	9q22.33	TRIM14	tripartite motif containing 14	9830	-0.190133	0.0401599	0.548332
ILMN_1719906	4	4q25	HADH	hydroxyacyl-CoA dehydrogenase	3033	-0.190242	0.0362767	0.536579
ILMN_2230892	21	21q22.11	IL10RB	interleukin 10 receptor subunit beta	3588	-0.190249	0.0217495	0.473733
ILMN_2045610	5	5q33.3	PPP1R2B	PPP1R2 family member B	153743	-0.190843	0.0499646	0.574609
ILMN_2181445	22	22q11.21	BCL2L13	BCL2 like 13	23786	-0.191269	0.0314521	0.516682
ILMN_1812289	20	20q11.21	CDK5RAP1	CDK5 regulatory subunit associated protein 1	51654	-0.192437	0.0416868	0.553688
ILMN_1782890	12	12q23.1	SLC25A3	solute carrier family 25 member 3	5250	-0.192573	0.0348616	0.533601
ILMN_1757020	16	16q21	CDH8	cadherin 8	1006	-0.192618	0.0144911	0.437852
ILMN_2413236	X	Xp21.2	MAGEB1	MAGE family member B1	4112	-0.192759	0.0288217	0.503914
ILMN_1761294	14	14q11.2	OR4K15	olfactory receptor family 4 subfamily K member 15	81127	-0.193093	0.0319036	0.519178
ILMN_1661755	9	9q34.11	NIBAN2	niban apoptosis regulator 2	64855	-0.193849	0.0382642	0.545799
ILMN_1772722	7	7q34	MRPS33	mitochondrial ribosomal protein S33	51650	-0.19392	0.033108	0.526161
ILMN_3308475	6	6p21.33	MIR1236	microRNA 1236	100302242	-0.194437	0.0474227	0.567295
ILMN_3309284	1	1p21.3	MIR137	microRNA 137	406928	-0.194477	0.0165448	0.452579
ILMN_3249296	20	20q13.31	GCNT7	glucosaminyl (N-acetyl) transferase family member 7	140687	-0.194521	0.0238098	0.478788
ILMN_3239060	7	7q36.1	KRBA1	KRAB-A domain containing 1	84626	-0.194587	0.0227139	0.473733
ILMN_2282366	12	12p13.33	IQSEC3	IQ motif and Sec7 domain ArfGEF 3	440073	-0.195058	0.045941	0.564781
ILMN_1782635	12	12p11.21	YARS2	tyrosyl-tRNA synthetase 2	51067	-0.19506	0.0195659	0.459175
ILMN_1803676	18	18p11.32	ENOSF1	enolase superfamily member 1	55556	-0.195448	0.0493877	0.572303
ILMN_2305843	10	10q11.23	CHAT	choline O-acetyltransferase	1103	-0.195956	0.0421582	0.553688
ILMN_1738529	2	2q35	BCS1L	BCS1 homolog, ubiquinol-cytochrome c reductase complex chaperone	617	-0.196484	0.0249668	0.485841
ILMN_1789266	8	8p21.1	CCDC25	coiled-coil domain containing 25	55246	-0.196567	0.0439907	0.559557
ILMN_1714372	2	2p23.3	ITSN2	intersectin 2	50618	-0.197703	0.0365091	0.537147
ILMN_1791587	5	5q35.3	OR2Y1	olfactory receptor family 2 subfamily Y member 1	134083	-0.197772	0.0184147	0.459064
ILMN_1732831	X	Xp11.3	CHST7	carbohydrate sulfotransferase 7	56548	-0.198364	0.0435803	0.557098
ILMN_1698307	7	7p13	DBNL	drebrin like	28988	-0.198437	0.049702	0.57414
ILMN_1718063	10	10q23.31	LIPA	lipase A, lysosomal acid type	3988	-0.198481	0.0361078	0.536515
ILMN_1814726	4	4q21.1	SCARB2	scavenger receptor class B member 2	950	-0.19874	0.0304133	0.514877
ILMN_1744786	X	Xq26.3	SAGE1	sarcoma antigen 1	55511	-0.198769	0.0326526	0.523353
ILMN_1735735	16	16q21	KATNB1	katanin regulatory subunit B1	10300	-0.198922	0.0435316	0.557098
ILMN_1691662	19	19p12	HAVCR1P1	hepatitis A virus cellular receptor 1 pseudogene 1	100101266	-0.19936	0.0367819	0.537783
ILMN_1765522	2	2p23.3	PPM1G	protein phosphatase, Mg2+/Mn2+ dependent 1G	5496	-0.200561	0.0448097	0.561385
ILMN_1751495	13	13q33.1	FGF14	fibroblast growth factor 14	2259	-0.200765	0.0120826	0.417541
ILMN_2142554	1	1q32.3	NENF	neudesin neurotrophic factor	29937	-0.200861	0.0369103	0.538387
ILMN_2412281	4	4q22.3	PDLIM5	PDZ and LIM domain 5	10611	-0.201071	0.0297552	0.509607
ILMN_1743427	1	1q24.2	SCYL3	SCY1 like pseudokinase 3	57147	-0.201393	0.0443674	0.560328
ILMN_1745826	18	18q21.1	KATNAL2	katanin catalytic subunit A1 like 2	83473	-0.201932	0.0282113	0.502123
ILMN_1666363	17	17q11.2	FOXN1	forkhead box N1	8456	-0.201949	0.0411091	0.551722
ILMN_1740234	10	10q25.1	GSTO2	glutathione S-transferase omega 2	119391	-0.202025	0.0420716	0.553688
ILMN_1734653	6	6q25.3	FNDC1	fibronectin type III domain containing 1	84624	-0.202121	0.0180251	0.456982
ILMN_1753393	14	14q11.2	OSGEP	O-sialoglycoprotein endopeptidase	55644	-0.202134	0.0195046	0.459175
ILMN_2075714	19	19q13.31	ZNF284	zinc finger protein 284	342909	-0.203007	0.0279245	0.49898
ILMN_1829989	10	10p11.22	ZEB1-AS1	ZEB1 antisense RNA 1	220930	-0.203017	0.0444401	0.560328
ILMN_1672393	6	6p21.1	CUL7	cullin 7	9820	-0.203657	0.0483481	0.57122
ILMN_1737813	1	1p34.1	ERI3	ERI1 exoribonuclease family member 3	79033	-0.203795	0.0458286	0.564281
ILMN_1702943	6	6p21.1	DLK2	delta like non-canonical Notch ligand 2	65989	-0.204329	0.0470172	0.566387
ILMN_1700604	11	11q13.2	RBM14	RNA binding motif protein 14	10432	-0.205078	0.0168117	0.454431
ILMN_2321720	2	2q33.1	CASP10	caspase 10	843	-0.205332	0.0367632	0.537783
ILMN_2195060	11	11q12.1	OR8K5	olfactory receptor family 8 subfamily K member 5	219453	-0.205417	0.0487055	0.57122
ILMN_1652151	9	9q21.11	TJP2	tight junction protein 2	9414	-0.205781	0.0257105	0.487987
ILMN_1653310	19	19q13.42	ZNF580	zinc finger protein 580	51157	-0.206053	0.0290089	0.503914
ILMN_1756669	1	1q24.1	POGK	pogo transposable element derived with KRAB domain	57645	-0.206206	0.0358757	0.535812
ILMN_1757461	3	3p21.1	ITIH3	inter-alpha-trypsin inhibitor heavy chain 3	3699	-0.20627	0.0425908	0.554449
ILMN_1663171	2	2p24.1	MATN3	matrilin 3	4148	-0.206315	0.0419163	0.553688
ILMN_3239932	12	12q23.1	SNORA53	small nucleolar RNA, H/ACA box 53	677832	-0.206392	0.0317405	0.518025
ILMN_1767894	8	8p11.21	POLB	DNA polymerase beta	5423	-0.206413	0.0383605	0.545858
ILMN_3240793	6	6q23.2	OR2A4	olfactory receptor family 2 subfamily A member 4	79541	-0.206828	0.0305568	0.515465
ILMN_1731521	Y	Yp11.2	TSPY10	testis specific protein Y-linked 10	100289087	-0.20694	0.0324928	0.523198
ILMN_1762115	21	21q22.11	CRYZL1	crystallin zeta like 1	9946	-0.207879	0.0273557	0.496036
ILMN_1725649	X	Xq13.1	RAB41	RAB41, member RAS oncogene family	347517	-0.207996	0.0126348	0.423339
ILMN_1684742	20	20q13.33	TCEA2	transcription elongation factor A2	6919	-0.208323	0.017909	0.456982
ILMN_1653463	2	2q12.3	SULT1C3	sulfotransferase family 1C member 3	442038	-0.208604	0.0392381	0.545858
ILMN_1723709	9	9q34.3	C9orf116	chromosome 9 open reading frame 116	138162	-0.208716	0.0287542	0.503914
ILMN_2246661	16	16p13.3	FAHD1	fumarylacetoacetate hydrolase domain containing 1	81889	-0.208809	0.0342016	0.532084
ILMN_1787618	15	15q26.1	ABHD2	abhydrolase domain containing 2, acylglycerol lipase	11057	-0.209184	0.0160221	0.449686
ILMN_1712751	2	2p23.3	HADHA	hydroxyacyl-CoA dehydrogenase trifunctional multienzyme complex subunit alpha	3030	-0.209207	0.0274041	0.496036
ILMN_1667030	16	16q23.3	HSBP1	heat shock factor binding protein 1	3281	-0.209396	0.0116719	0.411873
ILMN_1665657	21	21q22.2	LCA5L	lebercilin LCA5 like	150082	-0.20952	0.0230866	0.473733
ILMN_1788363	3	3p22.2	MLH1	mutL homolog 1	4292	-0.209534	0.0413788	0.552418
ILMN_3305614	19	19p13.2	ZNF812P	zinc finger protein 812, pseudogene	729648	-0.209717	0.0106232	0.393813
ILMN_1693912	17	17p11.2	SLC47A2	solute carrier family 47 member 2	146802	-0.209917	0.0228863	0.473733
ILMN_1704702	7	7q22.1	MCM7	minichromosome maintenance complex component 7	4176	-0.210244	0.0279649	0.499284
ILMN_1732452	3	3p21.2	MAPKAPK3	MAPK activated protein kinase 3	7867	-0.210256	0.0483459	0.57122
ILMN_1697469	20	20q13.11	SRSF6	serine and arginine rich splicing factor 6	6431	-0.210797	0.03532	0.533735
ILMN_1691855	9	9q34.3	CACNA1B	calcium voltage-gated channel subunit alpha1 B	774	-0.210929	0.0352286	0.533735
ILMN_1666819	11	11q23.3	PHLDB1	pleckstrin homology like domain family B member 1	23187	-0.211218	0.0465583	0.565698
ILMN_1773865	9	9q33.3	HSPA5	heat shock protein family A (Hsp70) member 5	3309	-0.211391	0.0473558	0.567282
ILMN_2078430	X	Xp21.2	MAGEB2	MAGE family member B2	4113	-0.211673	0.0202283	0.462951
ILMN_3233250	14	14q23.3	CCDC196	coiled-coil domain containing 196	440184	-0.212018	0.0219651	0.473733
ILMN_3246590	16	16q22.1	EXOC3L1	exocyst complex component 3 like 1	283849	-0.212461	0.0412115	0.551722
ILMN_1657932	11	11p15.5	MUC6	mucin 6, oligomeric mucus/gel-forming	4588	-0.212525	0.0452601	0.562119
ILMN_3202315	12	12q24.23	RPLP0	ribosomal protein lateral stalk subunit P0	6175	-0.213166	0.0228787	0.473733
ILMN_1702247	15	15q15.2	CCNDBP1	cyclin D1 binding protein 1	23582	-0.213185	0.0436723	0.557098
ILMN_3241665	1	1q32.2	SERTAD4-AS1	SERTAD4 antisense RNA 1	574036	-0.213411	0.0350266	0.533735
ILMN_1810400	20	20p13	IDH3B	isocitrate dehydrogenase (NAD(+)) 3 non-catalytic subunit beta	3420	-0.214041	0.0345418	0.532646
ILMN_1788832	18	18q11.2	MIB1	mindbomb E3 ubiquitin protein ligase 1	57534	-0.214085	0.043214	0.556809
ILMN_1736847	1	1p34.2	MED8	mediator complex subunit 8	112950	-0.21458	0.0336613	0.528863
ILMN_1691809	11	11p15.2	PSMA1	proteasome 20S subunit alpha 1	5682	-0.214747	0.0465397	0.565698
ILMN_1701413	16	16p13.3	PIGQ	phosphatidylinositol glycan anchor biosynthesis class Q	9091	-0.214751	0.0181579	0.456982
ILMN_3294741	10	10q11.22	CTSLP2	cathepsin L pseudogene 2	1517	-0.214798	0.0285917	0.503914
ILMN_3238712	16	16p13.3	SNRNP25	small nuclear ribonucleoprotein U11/U12 subunit 25	79622	-0.215196	0.0344147	0.532646
ILMN_1795779	1	1p13.3	LAMTOR5	late endosomal/lysosomal adaptor, MAPK and MTOR activator 5	10542	-0.216611	0.039136	0.545858
ILMN_1736969	3	3q26.1	SLITRK3	SLIT and NTRK like family member 3	22865	-0.217121	0.0471884	0.566387
ILMN_1737252	8	8p12	NRG1	neuregulin 1	3084	-0.217999	0.0425051	0.554238
ILMN_1802628	9	9p24.1	PLPP6	phospholipid phosphatase 6	403313	-0.218179	0.0489563	0.571754
ILMN_2205245	1	1p36.11	GPN2	GPN-loop GTPase 2	54707	-0.218499	0.0347058	0.533355
ILMN_1719010	17	17q21.31	ARL4D	ADP ribosylation factor like GTPase 4D	379	-0.218525	0.0427554	0.554566
ILMN_1740185	6	6p22.3	TPMT	thiopurine S-methyltransferase	7172	-0.218773	0.0391897	0.545858
ILMN_1700695	9	9q31.1-q31.2	SLC44A1	solute carrier family 44 member 1	23446	-0.219224	0.0473811	0.567295
ILMN_1685112	17	17q23.3	TACO1	translational activator of cytochrome c oxidase I	51204	-0.219426	0.0335685	0.52821
ILMN_1669323	21	21q22.2-q22.3	BACE2	beta-secretase 2	25825	-0.219606	0.0183709	0.459027
ILMN_1772177	6	6q16.3	ASCC3	activating signal cointegrator 1 complex subunit 3	10973	-0.219714	0.0455881	0.563332
ILMN_1738347	1	1q32.1	RNPEP	arginyl aminopeptidase	6051	-0.219735	0.0321362	0.520405
ILMN_1674353	22	22q13.33	MIOX	myo-inositol oxygenase	55586	-0.220043	0.0319645	0.519571
ILMN_3187680	11	11p11.2	ACCS	1-aminocyclopropane-1-carboxylate synthase homolog (inactive)	84680	-0.220484	0.0410836	0.551722
ILMN_1656327	12	12q24.33	GLT1D1	glycosyltransferase 1 domain containing 1	144423	-0.220619	0.0389243	0.545858
ILMN_3308435	20	20q13.33	MIR1914	microRNA 1914	100302137	-0.221089	0.0490197	0.571795
ILMN_3274814	21	21q22.12	LOC100133286	uncharacterized LOC100133286	100133286	-0.221222	0.0468128	0.565698
ILMN_1708627	1	1q42.12	SRP9	signal recognition particle 9	6726	-0.22134	0.0265319	0.491142
ILMN_1811678	11	11q14.3	MTNR1B	melatonin receptor 1B	4544	-0.22153	0.02022	0.462951
ILMN_2352380	21	21q22.3	TRPM2	transient receptor potential cation channel subfamily M member 2	7226	-0.221531	0.0304423	0.514894
ILMN_1747281	19	19p13.2	EVI5L	ecotropic viral integration site 5 like	115704	-0.221899	0.0192411	0.459175
ILMN_3198338	20	20p11.23	SCP2D1-AS1	SCP2D1 antisense RNA 1	100128496	-0.222003	0.0317898	0.518196
ILMN_1715662	3	3q13.2	CCDC80	coiled-coil domain containing 80	151887	-0.222312	0.0168191	0.454431
ILMN_3309975	9	9q21.32	MIR7-1	microRNA 7-1	407043	-0.222599	0.018627	0.459175
ILMN_2256765	13	13q34	CDC16	cell division cycle 16	8881	-0.222604	0.012838	0.424357
ILMN_3309929	14	14q32.31	MIR668	microRNA 668	768214	-0.222745	0.0257469	0.487987
ILMN_1738263	20	20q11.22	PIGU	phosphatidylinositol glycan anchor biosynthesis class U	128869	-0.222804	0.0243463	0.483167
ILMN_1659462	1	1q23.2	DUSP23	dual specificity phosphatase 23	54935	-0.222841	0.0480128	0.569988
ILMN_2311089	17	17q21.31	BRCA1	BRCA1 DNA repair associated	672	-0.222845	0.0242105	0.483167
ILMN_1670807	8	8q24.21	LRATD2	LRAT domain containing 2	157638	-0.223533	0.042053	0.553688
ILMN_1739885	3	3q21.2-q21.3	SLC41A3	solute carrier family 41 member 3	54946	-0.223574	0.0452836	0.562119
ILMN_1755737	22	22q13.33	TRABD	TraB domain containing	80305	-0.223653	0.0202122	0.462951
ILMN_2331087	11	11q12.2	MS4A7	membrane spanning 4-domains A7	58475	-0.224748	0.0417453	0.553688
ILMN_3248712	11	11p11.2	SNORD67	small nucleolar RNA, C/D box 67	692108	-0.224852	0.0222155	0.473733
ILMN_1740903	7	7q33	CYREN	cell cycle regulator of NHEJ	78996	-0.224892	0.0329539	0.524595
ILMN_1719531	3	3q11.2	EPHA6	EPH receptor A6	285220	-0.225012	0.0311182	0.516448
ILMN_3245069	1	1p34.3	BMP8A	bone morphogenetic protein 8a	353500	-0.225057	0.0142637	0.437852
ILMN_1809760	13	13q21.33	KLHL1	kelch like family member 1	57626	-0.225342	0.0486156	0.57122
ILMN_1689146	5	5q35.1	GABRP	gamma-aminobutyric acid type A receptor subunit pi	2568	-0.225679	0.017033	0.455716
ILMN_2112551	1	1p36.21	PRAMEF1	PRAME family member 1	65121	-0.225822	0.0466267	0.565698
ILMN_1811551	12	12p12.3	DERA	deoxyribose-phosphate aldolase	51071	-0.225866	0.0428766	0.555302
ILMN_3236381	1	1p36.33	MXRA8	matrix remodeling associated 8	54587	-0.226868	0.0262887	0.491142
ILMN_1693664	1	1p34.1	POMGNT1	protein O-linked mannose N-acetylglucosaminyltransferase 1 (beta 1,2-)	55624	-0.226876	0.0197675	0.460661
ILMN_1723768	11	11q23.3	NLRX1	NLR family member X1	79671	-0.2271	0.0386667	0.545858
ILMN_3278137	5	5q31.1	VDAC1	voltage dependent anion channel 1	7416	-0.227238	0.0343086	0.532084
ILMN_1789809	10	10q25.2	RPL13AP6	ribosomal protein L13a pseudogene 6	644511	-0.227387	0.0196421	0.460042
ILMN_1664798	9	9p13.2	GRHPR	glyoxylate and hydroxypyruvate reductase	9380	-0.227659	0.0432577	0.556809
ILMN_1745329	16	16p11.2	PRR14	proline rich 14	78994	-0.228005	0.019804	0.460661
ILMN_2090782	16	16q23.2	GCSH	glycine cleavage system protein H	2653	-0.228156	0.0484224	0.57122
ILMN_2082273	1	1q23.3	RGS5	regulator of G protein signaling 5	8490	-0.228272	0.0497111	0.57414
ILMN_1725079	12	12q14.1	TSPAN31	tetraspanin 31	6302	-0.228401	0.0172767	0.455716
ILMN_1656129	2	2q32.3	SLC39A10	solute carrier family 39 member 10	57181	-0.228678	0.0321017	0.520405
ILMN_1702806	2	2q11.2	PDCL3	phosducin like 3	79031	-0.229237	0.0178895	0.456982
ILMN_1661309	8	8q12.1	XKR4	XK related 4	114786	-0.229521	0.0123315	0.42093
ILMN_1785284	14	14q24.3	ALDH6A1	aldehyde dehydrogenase 6 family member A1	4329	-0.229647	0.0229996	0.473733
ILMN_3246902	16	16p12.3	ABCC6P1	ATP binding cassette subfamily C member 6 pseudogene 1	653190	-0.229703	0.0361704	0.536515
ILMN_2053829	14	14q12	CBLN3	cerebellin 3 precursor	643866	-0.229796	0.0324158	0.522563
ILMN_1728660	7	7q22.1	PMPCB	peptidase, mitochondrial processing subunit beta	9512	-0.229996	0.0213379	0.470965
ILMN_2369286	1	1q24.2	NME7	NME/NM23 family member 7	29922	-0.230383	0.0347744	0.533355
ILMN_1730477	12	12p13.2	TAS2R43	taste 2 receptor member 43	259289	-0.230715	0.044544	0.560679
ILMN_1741908	7	7q21.13	DPY19L2P4	DPY19L2 pseudogene 4	442523	-0.231141	0.0442621	0.560198
ILMN_2273572	1	1p34.3	OSCP1	organic solute carrier partner 1	127700	-0.231169	0.0434082	0.557094
ILMN_1663561	17	17q12	HNF1B	HNF1 homeobox B	6928	-0.231492	0.0358928	0.535812
ILMN_3242993	19	19p13.3	ZFR2	zinc finger RNA binding protein 2	23217	-0.232133	0.0132755	0.427344
ILMN_3291741	12	12q24.21	TBX5-AS1	TBX5 antisense RNA 1	255480	-0.232614	0.0041172	0.317908
ILMN_1811650	16	16q22.1	DUS2	dihydrouridine synthase 2	54920	-0.232645	0.0317284	0.518025
ILMN_1801725	8	8p11.22	C8orf86	chromosome 8 open reading frame 86	389649	-0.23284	0.0497306	0.57414
ILMN_3309814	14	14q11.2	MIR208B	microRNA 208b	100126336	-0.233054	0.0459511	0.564781
ILMN_1751051	7	7p14.1	C7orf25	chromosome 7 open reading frame 25	79020	-0.233296	0.02499	0.485841
ILMN_1697420	14	14q12	TINF2	TERF1 interacting nuclear factor 2	26277	-0.233651	0.0470512	0.566387
ILMN_1812940	19	19p13.13	TRMT1	tRNA methyltransferase 1	55621	-0.233678	0.00982275	0.389042
ILMN_1749515	1	1p36.12	CELA3B	chymotrypsin like elastase 3B	23436	-0.233785	0.0387566	0.545858
ILMN_1776464	13	13q12.12	PARP4	poly(ADP-ribose) polymerase family member 4	143	-0.233793	0.0489405	0.571754
ILMN_2397880	11	11p13	CSTF3	cleavage stimulation factor subunit 3	1479	-0.233866	0.0357994	0.535588
ILMN_2402168	1	1p36.22	EXOSC10	exosome component 10	5394	-0.233943	0.0376009	0.541264
ILMN_1695880	5	5q23.1	LOX	lysyl oxidase	4015	-0.234038	0.0474156	0.567295
ILMN_1758806	21	21q22.3	CFAP410	cilia and flagella associated protein 410	755	-0.234152	0.0198357	0.460818
ILMN_1775408	17	17q11.2	SPACA3	sperm acrosome associated 3	124912	-0.23424	0.0195785	0.459175
ILMN_1659240	3	3p25.3	MTMR14	myotubularin related protein 14	64419	-0.234321	0.0226873	0.473733
ILMN_1658937	10	10p14	LINC00710	long intergenic non-protein coding RNA 710	254312	-0.234888	0.0170588	0.455716
ILMN_2294878	7	7q11.23	NSUN5	NOP2/Sun RNA methyltransferase 5	55695	-0.234978	0.0238311	0.478788
ILMN_1664294	1	1p34.2	P3H1	prolyl 3-hydroxylase 1	64175	-0.235889	0.0301157	0.51329
ILMN_2305407	11	11q23.2	ZBTB16	zinc finger and BTB domain containing 16	7704	-0.236266	0.0084439	0.376219
ILMN_2225144	3	3p13	EIF4E3	eukaryotic translation initiation factor 4E family member 3	317649	-0.236304	0.0255779	0.487341
ILMN_2307851	4	4q13.3	NPFFR2	neuropeptide FF receptor 2	10886	-0.236307	0.0348136	0.533438
ILMN_1793263	1	1p35.1	C1orf94	chromosome 1 open reading frame 94	84970	-0.236402	0.0357282	0.535588
ILMN_1807042	6	6q21	MARCKS	myristoylated alanine rich protein kinase C substrate	4082	-0.236414	0.0166992	0.453913
ILMN_1663519	20	20p11.23	SLC24A3	solute carrier family 24 member 3	57419	-0.236586	0.0254529	0.486697
ILMN_2117240	4	4q13.3	DCK	deoxycytidine kinase	1633	-0.236737	0.0386507	0.545858
ILMN_1750901	3	3p21.31	GNAT1	G protein subunit alpha transducin 1	2779	-0.236755	0.0363042	0.536579
ILMN_1663387	2	2q14.2	CFAP221	cilia and flagella associated protein 221	200373	-0.237196	0.0332817	0.526823
ILMN_2202481	5	5q33.3	UBLCP1	ubiquitin like domain containing CTD phosphatase 1	134510	-0.237304	0.0458958	0.564781
ILMN_1836309	13	13q34	MCF2L-AS1	MCF2L antisense RNA 1	100289410	-0.237314	0.0386022	0.545858
ILMN_3235168	1	1p36.12	MUL1	mitochondrial E3 ubiquitin protein ligase 1	79594	-0.238034	0.0396022	0.546503
ILMN_1694504	1	1p34.1	RNF220	ring finger protein 220	55182	-0.238154	0.0108179	0.396064
ILMN_1813544	5	5p13.1	OXCT1	3-oxoacid CoA-transferase 1	5019	-0.238244	0.0134374	0.429713
ILMN_1776586	5	5q35.1	RPL26L1	ribosomal protein L26 like 1	51121	-0.238252	0.0228141	0.473733
ILMN_1684461	7	7q31.32	CADPS2	calcium dependent secretion activator 2	93664	-0.238315	0.0418827	0.553688
ILMN_1754600	1	1p22.1	FNBP1L	formin binding protein 1 like	54874	-0.238386	0.0454825	0.563036
ILMN_1706960	10	10p12.2-p12.1	KIAA1217	KIAA1217	56243	-0.238533	0.0175408	0.455716
ILMN_1749096	15	15q21.2	BCL2L10	BCL2 like 10	10017	-0.238704	0.0178997	0.456982
ILMN_1778357	21	21q22.3	DNMT3L	DNA methyltransferase 3 like	29947	-0.238814	0.020069	0.462951
ILMN_1680591	2	2p13.1	RTKN	rhotekin	6242	-0.238839	0.0406625	0.550665
ILMN_3212833	9	9q34.2	RPL7A	ribosomal protein L7a	6130	-0.238924	0.0394307	0.546114
ILMN_2399300	11	11p15.1	NAV2	neuron navigator 2	89797	-0.240145	0.0417833	0.553688
ILMN_1705187	1	1p21.3	PLPPR5	phospholipid phosphatase related 5	163404	-0.240229	0.0284692	0.503914
ILMN_1702177	6	6p21.2	GLO1	glyoxalase I	2739	-0.240298	0.0432841	0.556809
ILMN_1801124	11	11q22.3	MSANTD4	Myb/SANT DNA binding domain containing 4 with coiled-coils	84437	-0.240518	0.0244417	0.483167
ILMN_1684746	5	5q12.1	IPO11	importin 11	51194	-0.240635	0.0143136	0.437852
ILMN_3227440	18	18q21.2	LINC01630	long intergenic non-protein coding RNA 1630	100287225	-0.240703	0.0401027	0.548208
ILMN_1703441	1	1p36.11	ZNF593	zinc finger protein 593	51042	-0.240735	0.00840925	0.376219
ILMN_1763412	2	2q36.3	SPHKAP	SPHK1 interactor, AKAP domain containing	80309	-0.240993	0.0270428	0.49408
ILMN_2399100	4	4q21.21	FGF5	fibroblast growth factor 5	2250	-0.241016	0.0383453	0.545858
ILMN_1727205	1	1p36.13	ARHGEF10L	Rho guanine nucleotide exchange factor 10 like	55160	-0.241181	0.0384834	0.545858
ILMN_1694174	11	11p15.4	TRIM68	tripartite motif containing 68	55128	-0.241539	0.0208303	0.465868
ILMN_2219351	2	2p23.3	CENPO	centromere protein O	79172	-0.241956	0.0462785	0.565698
ILMN_1746924	19	19q13.41	ZNF610	zinc finger protein 610	162963	-0.242124	0.0431451	0.556809
ILMN_1758731	1	1p32.1	CYP2J2	cytochrome P450 family 2 subfamily J member 2	1573	-0.242296	0.0114216	0.40721
ILMN_2185077	14	14q23.1	C14orf39	chromosome 14 open reading frame 39	317761	-0.242361	0.035163	0.533735
ILMN_1745134	12	12q23.1	ANO4	anoctamin 4	121601	-0.24238	0.0358031	0.535588
ILMN_3241834	8	8q21.11	RPL7	ribosomal protein L7	6129	-0.242596	0.0154883	0.448244
ILMN_1684628	16	16q22.1	ZFP90	ZFP90 zinc finger protein	146198	-0.242673	0.019774	0.460661
ILMN_1674343	X	Xq22.1	NXF3	nuclear RNA export factor 3	56000	-0.242741	0.0494343	0.572303
ILMN_1681367	1	1p34.2	ZFP69	ZFP69 zinc finger protein	339559	-0.242871	0.0434651	0.557094
ILMN_1692133	19	19q13.31	ZNF226	zinc finger protein 226	7769	-0.243388	0.0226382	0.473733
ILMN_1725594	10	10p13	MINDY3	MINDY lysine 48 deubiquitinase 3	80013	-0.24349	0.0180965	0.456982
ILMN_1785891	14	14q12	PRKD1	protein kinase D1	5587	-0.243953	0.031645	0.517547
ILMN_2188909	2	2p16.1	FANCL	FA complementation group L	55120	-0.244165	0.0409394	0.551722
ILMN_2179083	10	10q24.2	LOXL4	lysyl oxidase like 4	84171	-0.244242	0.034285	0.532084
ILMN_1781060	3	3p25.2	SYN2	synapsin II	6854	-0.244265	0.0037021	0.306502
ILMN_1651599	9	9q34.3	ENTPD2	ectonucleoside triphosphate diphosphohydrolase 2	954	-0.244876	0.0132189	0.427344
ILMN_1778488	5	5q13.3-q14.1	WDR41	WD repeat domain 41	55255	-0.245115	0.0451351	0.561903
ILMN_2230035	16	16q13	BBS2	Bardet-Biedl syndrome 2	583	-0.245272	0.0232256	0.473733
ILMN_1764714	19	19p13.2	ANGPTL8	angiopoietin like 8	55908	-0.245634	0.0202711	0.462951
ILMN_1653182	7	7q22.1	PMS2P1	PMS1 homolog 2, mismatch repair system component pseudogene 1	5379	-0.245667	0.00530298	0.333016
ILMN_1791896	8	8q23.2	EBAG9	estrogen receptor binding site associated antigen 9	9166	-0.245768	0.0143837	0.437852
ILMN_1733364	6	6q21	QRSL1	glutaminyl-tRNA amidotransferase subunit QRSL1	55278	-0.245803	0.026988	0.4936
ILMN_1657977	10	10p12.2	MSRB2	methionine sulfoxide reductase B2	22921	-0.245975	0.0288853	0.503914
ILMN_1684266	3	3p21.31	LIMD1-AS1	LIMD1 antisense RNA 1	644714	-0.246031	0.0148843	0.439631
ILMN_1773643	5	5q11.2	SLC38A9	solute carrier family 38 member 9	153129	-0.246214	0.0421235	0.553688
ILMN_1723414	3	3p25.1	HACL1	2-hydroxyacyl-CoA lyase 1	26061	-0.246246	0.0071421	0.360514
ILMN_1702265	18	18q21.1	HDHD2	haloacid dehalogenase like hydrolase domain containing 2	84064	-0.246284	0.00940567	0.387072
ILMN_1679912	3	3p25.1	DPH3	diphthamide biosynthesis 3	285381	-0.246354	0.0188575	0.459175
ILMN_1801941	1	1p34.2	C1orf50	chromosome 1 open reading frame 50	79078	-0.246445	0.0206494	0.464996
ILMN_1775634	X	Xq23	AGTR2	angiotensin II receptor type 2	186	-0.246591	0.0118978	0.415455
ILMN_1706193	6	6q24.1	ECT2L	epithelial cell transforming 2 like	345930	-0.246638	0.0293491	0.506427
ILMN_1702489	1	1p36.11	TRIM63	tripartite motif containing 63	84676	-0.24672	0.00444208	0.318389
ILMN_1788240	2	2q11.2	ITPRIPL1	ITPRIP like 1	150771	-0.246744	0.0384524	0.545858
ILMN_1814631	1	1q21.3	SMCP	sperm mitochondria associated cysteine rich protein	4184	-0.247405	0.0177316	0.456982
ILMN_1800181	6	6q22.31	MCM9	minichromosome maintenance 9 homologous recombination repair factor	254394	-0.247743	0.0149711	0.440771
ILMN_1674193	2	2p13.2	EMX1	empty spiracles homeobox 1	2016	-0.247763	0.0426016	0.554449
ILMN_1814994	X	Xp22.12	YY2	YY2 transcription factor	404281	-0.248016	0.0289005	0.503914
ILMN_2415144	2	2q37.1	SP110	SP110 nuclear body protein	3431	-0.248123	0.0182541	0.45836
ILMN_1810604	11	11q22.3	ELMOD1	ELMO domain containing 1	55531	-0.248194	0.0143044	0.437852
ILMN_1706483	1	1q32.1	C1orf116	chromosome 1 open reading frame 116	79098	-0.248245	0.0462085	0.565698
ILMN_1781207	6	6q21	FYN	FYN proto-oncogene, Src family tyrosine kinase	2534	-0.248456	0.00908241	0.382794
ILMN_1688629	19	19q13.43	ZNF274	zinc finger protein 274	10782	-0.248725	0.047134	0.566387
ILMN_2387471	19	19p13.2	PRR36	proline rich 36	80164	-0.248837	0.0096552	0.388907
ILMN_3280496	17	17p13.1	RPL26	ribosomal protein L26	6154	-0.249196	0.0251449	0.486041
ILMN_1805823	20	20p12.1	BANF2	BANF family member 2	140836	-0.249273	0.0468509	0.565698
ILMN_2140999	5	5q14.1	ZFYVE16	zinc finger FYVE-type containing 16	9765	-0.249316	0.025725	0.487987
ILMN_3249756	X	Xq28	DNASE1L1	deoxyribonuclease 1 like 1	1774	-0.24934	0.0372818	0.540568
ILMN_1664466	9	9p21.3	KLHL9	kelch like family member 9	55958	-0.249447	0.0420775	0.553688
ILMN_1684336	3	3q25.31-q25.32	VEPH1	ventricular zone expressed PH domain containing 1	79674	-0.249542	0.00732369	0.362255
ILMN_1674366	1	1q25.2	LHX4	LIM homeobox 4	89884	-0.2496	0.0468144	0.565698
ILMN_1680378	2	2q31.2	RBM45	RNA binding motif protein 45	129831	-0.249729	0.0032676	0.296706
ILMN_2317463	7	7p22.3	INTS1	integrator complex subunit 1	26173	-0.249925	0.0493638	0.572303
ILMN_1666178	17	17q11.2	TP53I13	tumor protein p53 inducible protein 13	90313	-0.249939	0.0202798	0.462951
ILMN_1799150	1	1p13.2	PPM1J	protein phosphatase, Mg2+/Mn2+ dependent 1J	333926	-0.250003	0.00377478	0.308367
ILMN_1738938	11	11q23.1	TIMM8B	translocase of inner mitochondrial membrane 8 homolog B	26521	-0.25022	0.0110538	0.40144
ILMN_1784292	7	7p21.1	ANKMY2	ankyrin repeat and MYND domain containing 2	57037	-0.250506	0.0236122	0.477083
ILMN_2189424	1	1p36.33	MRPL20	mitochondrial ribosomal protein L20	55052	-0.250561	0.027715	0.497982
ILMN_1756826	2	2p22.1	MORN2	MORN repeat containing 2	729967	-0.250777	0.025928	0.48918
ILMN_1662659	19	19p12	ZNF492	zinc finger protein 492	57615	-0.250799	0.0432999	0.556809
ILMN_1752658	17	17q21.33	NGFR	nerve growth factor receptor	4804	-0.251203	0.0232	0.473733
ILMN_3235185	2	2q11.2	SNRNP200	small nuclear ribonucleoprotein U5 subunit 200	23020	-0.251523	0.0245507	0.48351
ILMN_1805519	6	6q21	CD24	CD24 molecule	100133941	-0.251724	0.035344	0.533735
ILMN_2212999	2	2q23.1-q23.2	KIF5C	kinesin family member 5C	3800	-0.252069	0.0243996	0.483167
ILMN_2077094	11	11q13.1	VPS51	VPS51 subunit of GARP complex	738	-0.252103	0.0493456	0.572303
ILMN_1754370	9	9p13.3	SPAG8	sperm associated antigen 8	26206	-0.252221	0.029654	0.508633
ILMN_1717490	12	12q24.13	RPL6	ribosomal protein L6	6128	-0.252268	0.0228772	0.473733
ILMN_3290136	11	11q22.3	CASP4LP	caspase 4 like, pseudogene	643733	-0.252499	0.0193637	0.459175
ILMN_2372136	3	c("3p21.31", "3p21.3")	P4HTM	prolyl 4-hydroxylase, transmembrane	54681	-0.252641	0.0424047	0.553688
ILMN_1764323	17	17q25.1	METTL23	methyltransferase like 23	124512	-0.252817	0.0263625	0.491142
ILMN_1654385	10	10p15.1	ASB13	ankyrin repeat and SOCS box containing 13	79754	-0.252923	0.0269864	0.4936
ILMN_1701244	12	12p13.33	ITFG2	integrin alpha FG-GAP repeat containing 2	55846	-0.25312	0.0306177	0.515465
ILMN_1744534	12	12p12.1	ETFRF1	electron transfer flavoprotein regulatory factor 1	144363	-0.25334	0.030849	0.516448
ILMN_1769250	11	11p11.2	ARFGAP2	ADP ribosylation factor GTPase activating protein 2	84364	-0.253727	0.0379972	0.542998
ILMN_1763941	15	15q23	LRRC49	leucine rich repeat containing 49	54839	-0.25411	0.0467894	0.565698
ILMN_1685929	1	1p13.1	VANGL1	VANGL planar cell polarity protein 1	81839	-0.254215	0.0487777	0.57122
ILMN_1669819	7	7q22.1	KPNA7	karyopherin subunit alpha 7	402569	-0.25424	0.00807392	0.375649
ILMN_1754145	11	11p13	CAPRIN1	cell cycle associated protein 1	4076	-0.25446	0.0316599	0.517547
ILMN_2325763	1	1p21.2	VCAM1	vascular cell adhesion molecule 1	7412	-0.254631	0.0499726	0.574609
ILMN_1740772	5	5q31.3	APBB3	amyloid beta precursor protein binding family B member 3	10307	-0.254667	0.0323946	0.522563
ILMN_1661647	7	7p14.1	LINC00265	long intergenic non-protein coding RNA 265	349114	-0.254851	0.0251284	0.486041
ILMN_1668657	2	2q33.1	C2orf69	chromosome 2 open reading frame 69	205327	-0.255005	0.0215299	0.472204
ILMN_1761474	2	2q31.2	HNRNPA3	heterogeneous nuclear ribonucleoprotein A3	220988	-0.255369	0.0387172	0.545858
ILMN_2270909	7	7p21.3	ICA1	islet cell autoantigen 1	3382	-0.255405	0.00433562	0.317908
ILMN_2363966	11	11p15.1	PTPN5	protein tyrosine phosphatase non-receptor type 5	84867	-0.25567	0.00511933	0.329169
ILMN_1685678	2	2q33.3	EEF1B2	eukaryotic translation elongation factor 1 beta 2	1933	-0.256004	0.00689483	0.356916
ILMN_1667977	2	2p25.1	TAF1B	TATA-box binding protein associated factor, RNA polymerase I subunit B	9014	-0.25626	0.0427205	0.554566
ILMN_1659856	1	1p35.2	FAM167B	family with sequence similarity 167 member B	84734	-0.256555	0.0194356	0.459175
ILMN_1805561	18	18q12.3	SLC14A1	solute carrier family 14 member 1 (Kidd blood group)	6563	-0.256725	0.0242741	0.483167
ILMN_2218935	7	7q31.33	GPR37	G protein-coupled receptor 37	2861	-0.256751	0.0315502	0.516783
ILMN_2134110	3	3p21.1	SELENOK	selenoprotein K	58515	-0.256903	0.0405659	0.550646
ILMN_1768812	11	11q23.3	FXYD6	FXYD domain containing ion transport regulator 6	53826	-0.257259	0.00423847	0.317908
ILMN_1660844	11	11q14.1	INTS4	integrator complex subunit 4	92105	-0.257279	0.0368602	0.538387
ILMN_1730391	6	6p21.1	MRPS18A	mitochondrial ribosomal protein S18A	55168	-0.257304	0.0173243	0.455716
ILMN_1800059	4	4p15.31-p15.2	KCNIP4	potassium voltage-gated channel interacting protein 4	80333	-0.257422	0.0477007	0.568638
ILMN_3240524	2	2q32.2	MFSD6	major facilitator superfamily domain containing 6	54842	-0.257489	0.0465734	0.565698
ILMN_3247159	9	9p22.1	SCARNA8	small Cajal body-specific RNA 8	677776	-0.257601	0.0296193	0.508633
ILMN_1802951	1	1q23.3	NUF2	NUF2 component of NDC80 kinetochore complex	83540	-0.257788	0.0386162	0.545858
ILMN_1762312	11	11q24.2	FOXRED1	FAD dependent oxidoreductase domain containing 1	55572	-0.258048	0.00700426	0.360014
ILMN_1716086	2	2q14.3	WDR33	WD repeat domain 33	55339	-0.258081	0.0125169	0.423339
ILMN_1810235	2	c("2p21", "2p16-p12")	ATP6V1E2	ATPase H+ transporting V1 subunit E2	90423	-0.258139	0.0419808	0.553688
ILMN_2173294	2	2p11.2	THNSL2	threonine synthase like 2	55258	-0.258449	0.0239235	0.480183
ILMN_1803745	12	12q13.2	SUOX	sulfite oxidase	6821	-0.259432	0.0175201	0.455716
ILMN_1796335	16	16q12.2	LPCAT2	lysophosphatidylcholine acyltransferase 2	54947	-0.259459	0.0334911	0.527956
ILMN_1696375	2	2p13.1	TTC31	tetratricopeptide repeat domain 31	64427	-0.259663	0.0416323	0.553688
ILMN_2160140	X	Xq11.2	MTMR8	myotubularin related protein 8	55613	-0.259886	0.0186853	0.459175
ILMN_1786259	17	17q21.33	LRRC59	leucine rich repeat containing 59	55379	-0.259986	0.0440816	0.559557
ILMN_2219131	19	19p13.3	RPS15	ribosomal protein S15	6209	-0.260654	0.0374331	0.540942
ILMN_1769606	11	11q21	PIWIL4	piwi like RNA-mediated gene silencing 4	143689	-0.260717	0.0218403	0.473733
ILMN_1677483	10	10q24.1	EXOSC1	exosome component 1	51013	-0.260889	0.00868076	0.380471
ILMN_2387251	20	20q13.12	ZSWIM3	zinc finger SWIM-type containing 3	140831	-0.261183	0.0466775	0.565698
ILMN_2407464	7	7q36.1	FASTK	Fas activated serine/threonine kinase	10922	-0.261202	0.00726407	0.360859
ILMN_1725338	8	8p23.1	CLDN23	claudin 23	137075	-0.26129	0.0369325	0.538387
ILMN_1709035	6	6p21.32	TSBP1	testis expressed basic protein 1	10665	-0.261528	0.00885918	0.380834
ILMN_1760554	10	10q24.32	CYP17A1	cytochrome P450 family 17 subfamily A member 1	1586	-0.261576	0.0288128	0.503914
ILMN_2198185	X	Xq28	TMEM187	transmembrane protein 187	8269	-0.261847	0.0329584	0.524595
ILMN_3264073	1	1q21.3	RPS27	ribosomal protein S27	6232	-0.262259	0.00921468	0.38554
ILMN_3247792	10	10q26.13	TEX36-AS1	TEX36 antisense RNA 1	100169752	-0.26265	0.00607247	0.342083
ILMN_1726545	19	19q13.42	LILRA5	leukocyte immunoglobulin like receptor A5	353514	-0.262931	0.0429304	0.555548
ILMN_2183885	7	7p14.1	MPLKIP	M-phase specific PLK1 interacting protein	136647	-0.263067	0.0202327	0.462951
ILMN_1812856	20	20q13.12	ZSWIM1	zinc finger SWIM-type containing 1	90204	-0.263137	0.0314124	0.516682
ILMN_1670748	4	4q34.1	GALNT7	polypeptide N-acetylgalactosaminyltransferase 7	51809	-0.26384	0.0494681	0.572303
ILMN_1796431	X	Xq26.3	GPR101	G protein-coupled receptor 101	83550	-0.264294	0.0356091	0.535588
ILMN_1759772	11	11p15.5	LRRC56	leucine rich repeat containing 56	115399	-0.264295	0.0333504	0.527425
ILMN_1664350	4	4p15.2	GBA3	glucosylceramidase beta 3 (gene/pseudogene)	57733	-0.264377	0.0100312	0.39255
ILMN_1655906	4	4q31.3	FBXW7	F-box and WD repeat domain containing 7	55294	-0.264467	0.0213987	0.4711
ILMN_3194087	1	1p36.12	LINC00339	long intergenic non-protein coding RNA 339	29092	-0.264502	0.0400273	0.548046
ILMN_2277676	19	19q13.32	ERCC1	ERCC excision repair 1, endonuclease non-catalytic subunit	2067	-0.26462	0.0167077	0.453913
ILMN_1794741	5	5q35.3	FLT4	fms related receptor tyrosine kinase 4	2324	-0.2647	0.0155297	0.448244
ILMN_1660927	7	7q22.1	FAM185A	family with sequence similarity 185 member A	222234	-0.265693	0.0407442	0.550665
ILMN_1659929	12	12q24.31	HNF1A	HNF1 homeobox A	6927	-0.265766	0.0302214	0.51351
ILMN_1767514	1	1q32.1	ZC3H11A	zinc finger CCCH-type containing 11A	9877	-0.265792	0.0258736	0.48918
ILMN_1790154	22	22q13.31	PHF21B	PHD finger protein 21B	112885	-0.26586	0.0386392	0.545858
ILMN_1791039	15	15q15.1	RTF1	RTF1 homolog, Paf1/RNA polymerase II complex component	23168	-0.266156	0.0143544	0.437852
ILMN_2195703	5	5q32	PPARGC1B	PPARG coactivator 1 beta	133522	-0.266412	0.0260707	0.490351
ILMN_1663502	4	4p16.3	NSD2	nuclear receptor binding SET domain protein 2	7468	-0.266464	0.0452565	0.562119
ILMN_1747397	14	14q11.2	SLC7A8	solute carrier family 7 member 8	23428	-0.266498	0.0234089	0.475082
ILMN_1788538	8	8q22.3	NCALD	neurocalcin delta	83988	-0.266576	0.00342427	0.299694
ILMN_1715181	19	19p13.11	ARRDC2	arrestin domain containing 2	27106	-0.266736	0.00400858	0.316247
ILMN_1740017	12	12p13.2	PRB1	proline rich protein BstNI subfamily 1	5542	-0.266963	0.0250565	0.486041
ILMN_2399036	1	1p36.11	SELENON	selenoprotein N	57190	-0.267525	0.0293174	0.506133
ILMN_1663667	1	1q21.3	FLAD1	flavin adenine dinucleotide synthetase 1	80308	-0.267567	0.0355758	0.535588
ILMN_1791302	X	Xp11.3	EFHC2	EF-hand domain containing 2	80258	-0.267807	0.0339878	0.531171
ILMN_3308500	11	11q12.2	MIR611	microRNA 611	693196	-0.267911	0.0290135	0.503914
ILMN_1820244	12	12q24.31	NRAV	negative regulator of antiviral response	100506668	-0.267967	0.0127045	0.423339
ILMN_1809145	22	22q13.1	TRIOBP	TRIO and F-actin binding protein	11078	-0.268148	0.0489172	0.571685
ILMN_3242125	7	7p11.2	VSTM2A	V-set and transmembrane domain containing 2A	222008	-0.268659	0.0117965	0.414996
ILMN_3221499	7	7q11.21	ZNF735	zinc finger protein 735	730291	-0.268667	0.0311293	0.516448
ILMN_1809613	2	2q37.1	NGEF	neuronal guanine nucleotide exchange factor	25791	-0.269072	0.0124661	0.423012
ILMN_1743806	17	17q25.1	MIF4GD	MIF4G domain containing	57409	-0.269381	0.0174209	0.455716
ILMN_1678143	12	12p12.3	ARHGDIB	Rho GDP dissociation inhibitor beta	397	-0.26958	0.00801196	0.375649
ILMN_3265434	20	20q11.21	BPIFA4P	BPI fold containing family A member 4, pseudogene	317716	-0.269589	0.00491866	0.327953
ILMN_1716004	1	1p33	NSUN4	NOP2/Sun RNA methyltransferase 4	387338	-0.270113	0.0147415	0.438031
ILMN_1653730	1	1p34.2	OXCT2	3-oxoacid CoA-transferase 2	64064	-0.270361	0.0479699	0.569988
ILMN_1751079	6	6p21.32	TAP1	transporter 1, ATP binding cassette subfamily B member	6890	-0.270858	0.0193164	0.459175
ILMN_1788769	6	6q25.3	MAS1	MAS1 proto-oncogene, G protein-coupled receptor	4142	-0.271264	0.0167213	0.453925
ILMN_1751243	17	17q21.32	OSBPL7	oxysterol binding protein like 7	114881	-0.271399	0.0423853	0.553688
ILMN_2108823	2	2q33.1	FZD7	frizzled class receptor 7	8324	-0.271423	0.045924	0.564781
ILMN_1701466	11	11p11.2	PEX16	peroxisomal biogenesis factor 16	9409	-0.27153	0.0173268	0.455716
ILMN_1693242	19	19q13.32	ZNF296	zinc finger protein 296	162979	-0.271652	0.0421025	0.553688
ILMN_3231638	10	10q25.3	FAM160B1	family with sequence similarity 160 member B1	57700	-0.27169	0.0477254	0.568638
ILMN_1685781	14	14q32.12	GON7	GON7 subunit of KEOPS complex	84520	-0.271757	0.0274563	0.496274
ILMN_1806667	4	4q21.21	FRAS1	Fraser extracellular matrix complex subunit 1	80144	-0.271766	0.0432055	0.556809
ILMN_3239912	22	22q11.1	HSFY1P1	HSFY1 pseudogene 1	27437	-0.271792	0.0223302	0.473733
ILMN_2066088	1	1p36.13	SRARP	steroid receptor associated and regulated protein	149563	-0.271851	0.0318398	0.518766
ILMN_1759087	11	11q12.1	OR10V1	olfactory receptor family 10 subfamily V member 1	390201	-0.272107	0.0449522	0.561611
ILMN_1665824	6	6p24.3	LINC00518	long intergenic non-protein coding RNA 518	221718	-0.272424	0.0251548	0.486041
ILMN_2326675	12	12q22	NR2C1	nuclear receptor subfamily 2 group C member 1	7181	-0.272798	0.00260194	0.278381
ILMN_1713636	1	1q21.3	S100A6	S100 calcium binding protein A6	6277	-0.272812	0.0192686	0.459175
ILMN_1796663	11	11p15.5	B4GALNT4	beta-1,4-N-acetyl-galactosaminyltransferase 4	338707	-0.272922	0.0312931	0.516448
ILMN_1711030	8	8q24.3	OPLAH	5-oxoprolinase, ATP-hydrolysing	26873	-0.27298	0.0311531	0.516448
ILMN_3244323	1	1p36.33	MRPL20-AS1	MRPL20 antisense RNA 1	148413	-0.273013	0.0342997	0.532084
ILMN_2072541	10	10q26.11	RAB11FIP2	RAB11 family interacting protein 2	22841	-0.273186	0.0119337	0.415455
ILMN_2188959	14	14q24.3	ACOT2	acyl-CoA thioesterase 2	10965	-0.273256	0.0137245	0.433625
ILMN_3234959	4	4p16.3	LINC00955	long intergenic non-protein coding RNA 955	285492	-0.273422	0.00789006	0.374388
ILMN_1792671	12	12q21.32	C12orf29	chromosome 12 open reading frame 29	91298	-0.273461	0.0437429	0.557722
ILMN_1755664	12	12q13.2	RPS26	ribosomal protein S26	6231	-0.273795	0.0391661	0.545858
ILMN_1689306	16	16p12.3	TMC7	transmembrane channel like 7	79905	-0.273851	0.048093	0.570366
ILMN_1740512	X	Xq22.2	TMSB15B	thymosin beta 15B	286527	-0.274034	0.0366594	0.537542
ILMN_1717234	5	5q15	CAST	calpastatin	831	-0.274104	0.00745226	0.365616
ILMN_2300396	8	8q24.3	COMMD5	COMM domain containing 5	28991	-0.274205	0.00554688	0.334325
ILMN_2381296	14	14q24.3	GSTZ1	glutathione S-transferase zeta 1	2954	-0.27428	0.00245539	0.274844
ILMN_2341343	3	3q24	AGTR1	angiotensin II receptor type 1	185	-0.274675	0.0344807	0.532646
ILMN_2243308	12	12q13.13	ACVR1B	activin A receptor type 1B	91	-0.275235	0.0339206	0.530602
ILMN_1668983	3	3p22.2	ACVR2B	activin A receptor type 2B	93	-0.275373	0.0144707	0.437852
ILMN_1706502	2	2p22.2	EIF2AK2	eukaryotic translation initiation factor 2 alpha kinase 2	5610	-0.275523	0.0227297	0.473733
ILMN_2290118	9	9q33.2	MEGF9	multiple EGF like domains 9	1955	-0.275607	0.0267002	0.491671
ILMN_2394750	7	7q33	EXOC4	exocyst complex component 4	60412	-0.275648	0.0179534	0.456982
ILMN_1658494	13	13q14.11	RGCC	regulator of cell cycle	28984	-0.275734	0.0157567	0.449686
ILMN_2287147	17	17q21.31	UBTF	upstream binding transcription factor	7343	-0.275761	0.0037767	0.308367
ILMN_1708983	12	12p12.1	CFAP94	cilia and flagella associated protein 94	55259	-0.276068	0.0321098	0.520405
ILMN_1729767	12	12q13.13	TARBP2	TARBP2 subunit of RISC loading complex	6895	-0.276088	0.0306849	0.515465
ILMN_1755677	14	14q12	EMC9	ER membrane protein complex subunit 9	51016	-0.276443	0.0139988	0.437221
ILMN_2047511	7	7p22.3	ADAP1	ArfGAP with dual PH domains 1	11033	-0.276568	0.00364358	0.306502
ILMN_1680902	2	2q12.1	LINC01114	long intergenic non-protein coding RNA 1114	284998	-0.276726	0.0272044	0.495681
ILMN_1754553	11	11q12.1	MED19	mediator complex subunit 19	219541	-0.276747	0.0305819	0.515465
ILMN_1774890	X	Xq12	LAS1L	LAS1 like ribosome biogenesis factor	81887	-0.276932	0.0171662	0.455716
ILMN_1736982	6	6p24.1	PHACTR1	phosphatase and actin regulator 1	221692	-0.277106	0.0384005	0.545858
ILMN_2101368	19	19p13.3	ANKRD24	ankyrin repeat domain 24	170961	-0.277139	0.00658673	0.34922
ILMN_3281039	10	10q26.13	CTBP2	C-terminal binding protein 2	1488	-0.277374	0.0266313	0.491142
ILMN_1752451	15	15q25.1	CTSH	cathepsin H	1512	-0.277404	0.0487781	0.57122
ILMN_1903159	14	14q23.1	PPM1A	protein phosphatase, Mg2+/Mn2+ dependent 1A	5494	-0.277506	0.0152469	0.444436
ILMN_1762506	9	9p21.2	LOC100506422	putative deoxyuridine 5'-triphosphate nucleotidohydrolase-like protein FLJ16323	100506422	-0.277578	0.0110763	0.40144
ILMN_1735474	8	8p21.3	R3HCC1	R3H domain and coiled-coil containing 1	203069	-0.278088	0.00947703	0.387595
ILMN_1804498	7	7p22.3	BRAT1	BRCA1 associated ATM activator 1	221927	-0.278101	0.00678055	0.35432
ILMN_2262044	8	8q24.3	PARP10	poly(ADP-ribose) polymerase family member 10	84875	-0.27826	0.00929809	0.387072
ILMN_1778078	20	20p13	VPS16	VPS16 core subunit of CORVET and HOPS complexes	64601	-0.278266	0.00905219	0.382794
ILMN_3244963	1	1q23.2	DCAF8	DDB1 and CUL4 associated factor 8	50717	-0.278623	0.0484983	0.57122
ILMN_3283316	5	5p15.31	LINC01018	long intergenic non-protein coding RNA 1018	255167	-0.278751	0.00409951	0.317908
ILMN_1739259	11	11q23.3	UBE4A	ubiquitination factor E4A	9354	-0.279268	0.0278734	0.49898
ILMN_1741156	X	Xq22.1	ARMCX5	armadillo repeat containing X-linked 5	64860	-0.279731	0.0426641	0.554566
ILMN_1757606	4	4q24	SLC9B1	solute carrier family 9 member B1	150159	-0.280022	0.00874484	0.380695
ILMN_1715804	17	17p13.3	PITPNA	phosphatidylinositol transfer protein alpha	5306	-0.280167	0.0368386	0.538383
ILMN_1696503	11	11q21	JRKL	JRK like	8690	-0.280307	0.00700688	0.360014
ILMN_1739521	3	3q26.31	NLGN1	neuroligin 1	22871	-0.280525	0.00951364	0.387595
ILMN_2294431	5	5q31.2	CDC25C	cell division cycle 25C	995	-0.2806	0.00869051	0.380471
ILMN_1813834	1	1p13.3	PRMT6	protein arginine methyltransferase 6	55170	-0.280671	0.0204922	0.464184
ILMN_1651429	22	22q12.2	SELENOM	selenoprotein M	140606	-0.281236	0.0437699	0.55786
ILMN_1706176	7	7q21.11	GNAT3	G protein subunit alpha transducin 3	346562	-0.282266	0.0147994	0.439091
ILMN_1699022	11	11q21	ENDOD1	endonuclease domain containing 1	23052	-0.282805	0.037453	0.540942
ILMN_1763539	18	18q21.1	IER3IP1	immediate early response 3 interacting protein 1	51124	-0.283177	0.0189905	0.459175
ILMN_1763198	12	12q13.3	STAT6	signal transducer and activator of transcription 6	6778	-0.283222	0.00482502	0.327891
ILMN_1768900	19	19q13.2	IFNL3	interferon lambda 3	282617	-0.284498	0.0213765	0.471
ILMN_1794643	20	20q13.33	ZGPAT	zinc finger CCCH-type and G-patch domain containing	84619	-0.284593	0.0132605	0.427344
ILMN_1769140	9	9q32	KIAA1958	KIAA1958	158405	-0.284635	0.0333942	0.527876
ILMN_1713178	3	3p14.3	DENND6A	DENN domain containing 6A	201627	-0.284663	0.0308292	0.516448
ILMN_1743095	19	19p13.2	CCDC151	coiled-coil domain containing 151	115948	-0.28532	0.00717878	0.360514
ILMN_1786976	20	20q13.32	RAB22A	RAB22A, member RAS oncogene family	57403	-0.28536	0.0167489	0.454023
ILMN_2114747	4	4q34.3	NEIL3	nei like DNA glycosylase 3	55247	-0.285521	0.0057485	0.337721
ILMN_1717524	2	2q11.2	LIPT1	lipoyltransferase 1	51601	-0.285531	0.0233928	0.475082
ILMN_1687785	4	4q24	PPA2	inorganic pyrophosphatase 2	27068	-0.285855	0.0346534	0.533114
ILMN_1755077	6	6q24.1	HEBP2	heme binding protein 2	23593	-0.286347	0.0436732	0.557098
ILMN_2311779	17	17q21.31	TMUB2	transmembrane and ubiquitin like domain containing 2	79089	-0.286363	0.00558237	0.334606
ILMN_1777725	20	20q13.33	LSM14B	LSM family member 14B	149986	-0.286632	0.0442893	0.560328
ILMN_2398865	15	15q22.2	VPS13C	vacuolar protein sorting 13 homolog C	54832	-0.286964	0.0222606	0.473733
ILMN_1807439	15	15q26.3	ALDH1A3	aldehyde dehydrogenase 1 family member A3	220	-0.287459	0.00409688	0.317908
ILMN_3248379	18	18p11.32	ROCK1P1	Rho associated coiled-coil containing protein kinase 1 pseudogene 1	727758	-0.287557	0.0140135	0.437221
ILMN_1825660	11	11q24.2	CCDC15	coiled-coil domain containing 15	80071	-0.287659	0.00421275	0.317908
ILMN_1702384	8	8q22.3	ZNF706	zinc finger protein 706	51123	-0.288195	0.0185216	0.459175
ILMN_1730816	12	12p13.31	GPR162	G protein-coupled receptor 162	27239	-0.28898	0.0102398	0.392561
ILMN_2269256	10	10q21.3	DNAJC12	DnaJ heat shock protein family (Hsp40) member C12	56521	-0.289215	0.0127126	0.423339
ILMN_1681737	X	Xq22.1	TMSB15A	thymosin beta 15A	11013	-0.289336	0.0319283	0.519227
ILMN_1699965	13	13q33.1	METTL21EP	methyltransferase like 21E, pseudogene	121952	-0.289593	0.0231837	0.473733
ILMN_2128048	5	5q31.3	PCDHB3	protocadherin beta 3	56132	-0.289595	0.0170242	0.455716
ILMN_1690733	4	4q25	EGF	epidermal growth factor	1950	-0.289693	0.0163262	0.45029
ILMN_1695282	9	9q34.13	RAPGEF1	Rap guanine nucleotide exchange factor 1	2889	-0.289822	0.0262968	0.491142
ILMN_3311190	12	12q24.22	LINC00173	long intergenic non-protein coding RNA 173	100287569	-0.290114	0.0233002	0.473921
ILMN_2186678	6	6q25.1	ARMT1	acidic residue methyltransferase 1	79624	-0.290352	0.04721	0.566387
ILMN_1716468	3	3q22.1	NUDT16L2P	nudix hydrolase 16 like 2, pseudogene	152195	-0.29041	0.0195254	0.459175
ILMN_1723536	1	1p31.1	USP33	ubiquitin specific peptidase 33	23032	-0.290597	0.0200917	0.462951
ILMN_1744403	2	2q11.1	KCNIP3	potassium voltage-gated channel interacting protein 3	30818	-0.290922	0.0188863	0.459175
ILMN_2234710	12	12p13.1-p12.3	C12orf60	chromosome 12 open reading frame 60	144608	-0.29113	0.0497435	0.57414
ILMN_2096031	12	12q21.1	TRHDE-AS1	TRHDE antisense RNA 1	283392	-0.291309	0.0275564	0.496866
ILMN_1755076	19	19p13.2	FLJ25758	microtubule affinity regulating kinase 1 pseudogene	497049	-0.291404	0.0371604	0.540125
ILMN_1704195	16	16q22.1	FCSK	fucose kinase	197258	-0.291474	0.0022051	0.269443
ILMN_2175020	3	3q21.3	RPL32P3	ribosomal protein L32 pseudogene 3	132241	-0.291512	0.0344591	0.532646
ILMN_1737818	12	12q24.31	C12orf43	chromosome 12 open reading frame 43	64897	-0.291651	0.0289707	0.503914
ILMN_1667883	22	22q12.2	THOC5	THO complex 5	8563	-0.291964	0.0029071	0.283511
ILMN_2214603	14	14q13.2	PPP2R3C	protein phosphatase 2 regulatory subunit B''gamma	55012	-0.291978	0.0214686	0.471985
ILMN_1810855	15	15q26.1	GDPGP1	GDP-D-glucose phosphorylase 1	390637	-0.292076	0.00825665	0.376151
ILMN_1792168	1	1p36.11	GALE	UDP-galactose-4-epimerase	2582	-0.292136	0.0258172	0.489051
ILMN_1814022	11	11p11.2	NR1H3	nuclear receptor subfamily 1 group H member 3	10062	-0.292285	0.0229272	0.473733
ILMN_1742618	17	17p13.1	XAF1	XIAP associated factor 1	54739	-0.292347	0.0136986	0.433277
ILMN_1709763	4	4q31.21	C4orf51	chromosome 4 open reading frame 51	646603	-0.292396	0.036161	0.536515
ILMN_1796113	12	12q13.12	BCDIN3D	BCDIN3 domain containing RNA methyltransferase	144233	-0.292425	0.0130408	0.427299
ILMN_1680343	1	1p21.2	AGL	amylo-alpha-1, 6-glucosidase, 4-alpha-glucanotransferase	178	-0.292599	0.0151509	0.443415
ILMN_1664910	3	3p22.1	RPSA	ribosomal protein SA	3921	-0.292816	0.0395377	0.546114
ILMN_1692058	15	15q11.2	NDN	necdin, MAGE family member	4692	-0.293055	0.00368789	0.306502
ILMN_1694985	10	10p15.1	AKR1E2	aldo-keto reductase family 1 member E2	83592	-0.293078	0.0111252	0.40144
ILMN_2362911	1	1q22	CLK2	CDC like kinase 2	1196	-0.293296	0.046974	0.566387
ILMN_1795183	14	14q11.2	RNASE1	ribonuclease A family member 1, pancreatic	6035	-0.293557	0.0338187	0.530042
ILMN_2148469	4	4q12	RASL11B	RAS like family 11 member B	65997	-0.294565	0.0255776	0.487341
ILMN_1667564	17	17p11.2	ALDH3A2	aldehyde dehydrogenase 3 family member A2	224	-0.294628	0.0224055	0.473733
ILMN_1680714	13	13q33.3	LIG4	DNA ligase 4	3981	-0.295017	0.0377972	0.542198
ILMN_2205622	11	11p15.5	MUC2	mucin 2, oligomeric mucus/gel-forming	4583	-0.2952	0.044877	0.561385
ILMN_1709153	5	5q23.1	PRR16	proline rich 16	51334	-0.295227	0.0264572	0.491142
ILMN_1794989	22	22q11.21	TMEM191B	transmembrane protein 191B	728229	-0.295351	0.047078	0.566387
ILMN_1793267	19	19q13.31	ETHE1	ETHE1 persulfide dioxygenase	23474	-0.295825	0.0452967	0.562119
ILMN_3239279	7	7p22.1	RSPH10B2	radial spoke head 10 homolog B2	728194	-0.295846	0.00449335	0.319896
ILMN_1659990	7	7q32.1	HILPDA	hypoxia inducible lipid droplet associated	29923	-0.295982	0.0142337	0.437852
ILMN_3294186	22	22q11.21	BCRP2	BCR pseudogene 2	400892	-0.296545	0.00391026	0.312061
ILMN_1836218	5	5p15.33	PP7080	uncharacterized LOC25845	25845	-0.297233	0.0374786	0.54104
ILMN_1814600	5	5q12.1	DEPDC1B	DEP domain containing 1B	55789	-0.297291	0.0248858	0.485316
ILMN_1703622	15	15q22.31	PPIB	peptidylprolyl isomerase B	5479	-0.297451	0.030177	0.51329
ILMN_1662161	9	9q34.11	TBC1D13	TBC1 domain family member 13	54662	-0.297509	0.00565203	0.335386
ILMN_1710629	22	22q11.23	CES5AP1	carboxylesterase 5A pseudogene 1	649264	-0.297632	0.00905626	0.382794
ILMN_2051373	1	1q32.3	NEK2	NIMA related kinase 2	4751	-0.297695	0.0418664	0.553688
ILMN_1653143	10	10q22.2	ECD	ecdysoneless cell cycle regulator	11319	-0.297897	0.0493074	0.572303
ILMN_1739813	3	3p21.31	HYAL1	hyaluronidase 1	3373	-0.29837	0.0174926	0.455716
ILMN_1745501	1	1p34.3	DNALI1	dynein axonemal light intermediate chain 1	7802	-0.298384	0.00614026	0.343098
ILMN_3202863	2	2q13	SEPTIN10	septin 10	151011	-0.298755	0.00493945	0.327999
ILMN_1679919	22	22q12.2	ASCC2	activating signal cointegrator 1 complex subunit 2	84164	-0.298981	0.00309943	0.291161
ILMN_1779412	11	11q13.4	OR2AT4	olfactory receptor family 2 subfamily AT member 4	341152	-0.299263	0.0102111	0.392561
ILMN_3241953	13	13q32.3	GGACT	gamma-glutamylamine cyclotransferase	87769	-0.299778	0.0244783	0.483167
ILMN_1776354	17	17q21.2	KRTAP1-3	keratin associated protein 1-3	81850	-0.300197	0.0460145	0.564807
ILMN_1761882	3	3p14.2	C3orf14	chromosome 3 open reading frame 14	57415	-0.300378	0.0273745	0.496036
ILMN_1768293	5	5p13.2	NUP155	nucleoporin 155	9631	-0.300434	0.00861525	0.379236
ILMN_1768877	10	10p11.22	CCDC7	coiled-coil domain containing 7	79741	-0.300858	0.00454314	0.321621
ILMN_2393450	14	14q32.33	INF2	inverted formin 2	64423	-0.300932	0.0193662	0.459175
ILMN_1682935	1	1q41	LYPLAL1	lysophospholipase like 1	127018	-0.300968	0.0117117	0.412435
ILMN_2117845	Y	Yq11.23	CSPG4P1Y	CSPG4 pseudogene 1 Y-linked	114758	-0.301232	0.0284248	0.503914
ILMN_1736077	4	4p14	LIAS	lipoic acid synthetase	11019	-0.301549	0.0142091	0.437852
ILMN_1760574	X	Xp22.13	RAI2	retinoic acid induced 2	10742	-0.301926	0.00820554	0.376151
ILMN_1701393	12	12q24.21	TBX3	T-box transcription factor 3	6926	-0.302407	0.0105397	0.393813
ILMN_1812452	19	19p13.2	S1PR2	sphingosine-1-phosphate receptor 2	9294	-0.302495	0.00979019	0.389042
ILMN_1756721	14	14q21.2	FSCB	fibrous sheath CABYR binding protein	84075	-0.302829	0.00545576	0.333336
ILMN_1718537	10	10q24.32	HPS6	HPS6 biogenesis of lysosomal organelles complex 2 subunit 3	79803	-0.30331	0.0159562	0.449686
ILMN_1685022	3	3p25.1	CAPN7	calpain 7	23473	-0.303689	0.00999352	0.391964
ILMN_1736015	4	4q28.2	JADE1	jade family PHD finger 1	79960	-0.303987	0.0144116	0.437852
ILMN_3212591	1	1p13.2	CAPZA1	capping actin protein of muscle Z-line subunit alpha 1	829	-0.304245	0.00904672	0.382794
ILMN_2126408	16	16p13.3	UNKL	unk like zinc finger	64718	-0.304334	0.0466439	0.565698
ILMN_1708323	X	Xp11.21	ALAS2	5'-aminolevulinate synthase 2	212	-0.304433	0.0369187	0.538387
ILMN_1698487	11	11q23.1	SDHD	succinate dehydrogenase complex subunit D	6392	-0.304447	0.0263723	0.491142
ILMN_1687092	11	11p11.2	KBTBD4	kelch repeat and BTB domain containing 4	55709	-0.304479	0.00430563	0.317908
ILMN_3309349	4	4q26	SNHG8	small nucleolar RNA host gene 8	100093630	-0.304786	0.022163	0.473733
ILMN_1664292	19	19q13.42	ZNF415	zinc finger protein 415	55786	-0.305138	0.0357506	0.535588
ILMN_1666727	19	19q13.43	ZNF586	zinc finger protein 586	54807	-0.305763	0.0412583	0.551968
ILMN_2045419	8	8p21.2	BNIP3L	BCL2 interacting protein 3 like	665	-0.306149	0.0434674	0.557094
ILMN_1695461	20	20p13	PTPRA	protein tyrosine phosphatase receptor type A	5786	-0.306697	0.0472318	0.566387
ILMN_1749403	7	7q32.1	TSPAN33	tetraspanin 33	340348	-0.306719	0.00660158	0.34922
ILMN_2200503	3	3q12.2	NIT2	nitrilase family member 2	56954	-0.307493	0.0105641	0.393813
ILMN_1750469	10	10p15.1	UCN3	urocortin 3	114131	-0.307627	0.0229917	0.473733
ILMN_1652631	9	9p13.3	GLIPR2	GLI pathogenesis related 2	152007	-0.307646	0.00835593	0.376219
ILMN_1809467	2	2p11.2	VAMP5	vesicle associated membrane protein 5	10791	-0.307765	0.0226842	0.473733
ILMN_1739133	8	8q13.1	MCMDC2	minichromosome maintenance domain containing 2	157777	-0.308405	0.0195637	0.459175
ILMN_1751034	16	16p12.3	ITPRIPL2	ITPRIP like 2	162073	-0.309176	0.0317629	0.518025
ILMN_2287296	1	1p36.11	SYF2	SYF2 pre-mRNA splicing factor	25949	-0.3092	0.0468308	0.565698
ILMN_1792607	9	9q34.3	OBP2A	odorant binding protein 2A	29991	-0.309231	0.03239	0.522563
ILMN_1799860	1	1q23.2	PIGM	phosphatidylinositol glycan anchor biosynthesis class M	93183	-0.309318	0.0197914	0.460661
ILMN_1676763	10	10q23.33	PIPSL	PIP5K1A and PSMD4 like (pseudogene)	266971	-0.309677	0.0422207	0.553688
ILMN_3248915	13	13q14.11	TPTE2P5	transmembrane phosphoinositide 3-phosphatase and tensin homolog 2 pseudogene 5	100616668	-0.309936	0.00393346	0.313187
ILMN_3236358	4	4p16.3	NOP14	NOP14 nucleolar protein	8602	-0.310127	0.0149479	0.440465
ILMN_1728057	6	6q13	SDHAF4	succinate dehydrogenase complex assembly factor 4	135154	-0.310393	0.0332786	0.526823
ILMN_1760933	1	1p36.32	PEX10	peroxisomal biogenesis factor 10	5192	-0.310595	0.00432763	0.317908
ILMN_3243244	1	1q25.1	SNORD80	small nucleolar RNA, C/D box 80	26774	-0.310676	0.0464838	0.565698
ILMN_1666545	9	9q21.13	GCNT1	glucosaminyl (N-acetyl) transferase 1	2650	-0.310928	0.0470176	0.566387
ILMN_2382309	14	14q32.13	TCL1B	TCL1 family AKT coactivator B	9623	-0.311235	0.0150933	0.442479
ILMN_1715923	7	7q35	TAS2R60	taste 2 receptor member 60	338398	-0.31173	0.00171862	0.260906
ILMN_2206344	10	10q22.2	NDST2	N-deacetylase and N-sulfotransferase 2	8509	-0.312097	0.0102522	0.392561
ILMN_2311278	10	10q25.1-q25.2	ADD3	adducin 3	120	-0.312143	0.00846454	0.376262
ILMN_2253246	21	21q22.11	DNAJC28	DnaJ heat shock protein family (Hsp40) member C28	54943	-0.312356	0.0174128	0.455716
ILMN_2290808	13	13q12.2	RPL21	ribosomal protein L21	6144	-0.312863	0.0106941	0.394124
ILMN_1811814	19	19p12	ZNF90	zinc finger protein 90	7643	-0.312973	0.0170773	0.455716
ILMN_3308936	X	Xq12	MIR223	microRNA 223	407008	-0.313173	0.0461825	0.565608
ILMN_3220265	3	3q24-q25.1	CP	ceruloplasmin	1356	-0.313455	0.0263149	0.491142
ILMN_1814106	9	9q34.3	CYSRT1	cysteine rich tail 1	375791	-0.313683	0.0206878	0.46519
ILMN_2401844	22	22q12.2	PATZ1	POZ/BTB and AT hook containing zinc finger 1	23598	-0.313704	0.0166178	0.453615
ILMN_1671123	4	4q28.1	LINC01091	long intergenic non-protein coding RNA 1091	285419	-0.313811	0.00297618	0.285889
ILMN_1726815	6	6p22.2	H3C8	H3 clustered histone 8	8355	-0.314227	0.0448957	0.561416
ILMN_1774949	21	21q22.13	PIGP	phosphatidylinositol glycan anchor biosynthesis class P	51227	-0.314474	0.0282743	0.502726
ILMN_1651636	19	19q13.2	CYP2A13	cytochrome P450 family 2 subfamily A member 13	1553	-0.314831	0.0170789	0.455716
ILMN_1729019	7	7p14.2	SEPTIN7	septin 7	989	-0.315691	0.0146417	0.437852
ILMN_2413264	14	14q22.3	SOCS4	suppressor of cytokine signaling 4	122809	-0.315784	0.0104813	0.393813
ILMN_1691927	15	15q25.2	BTBD1	BTB domain containing 1	53339	-0.315905	0.0178199	0.456982
ILMN_1760294	19	19q13.43	ZNF417	zinc finger protein 417	147687	-0.316077	0.0112576	0.40303
ILMN_1666174	22	22q11.1	ADA2	adenosine deaminase 2	51816	-0.316157	0.0056781	0.336355
ILMN_1812112	14	14q24.2	ADAM21	ADAM metallopeptidase domain 21	8747	-0.316307	0.0185721	0.459175
ILMN_2409220	5	5q34	HMMR	hyaluronan mediated motility receptor	3161	-0.316782	0.00397197	0.314799
ILMN_2172600	19	19q13.12	ZNF345	zinc finger protein 345	25850	-0.316918	0.0409381	0.551722
ILMN_3251455	2	2p21	RHOQ	ras homolog family member Q	23433	-0.317037	0.0429601	0.555548
ILMN_1654545	8	8q24.3	CPSF1	cleavage and polyadenylation specific factor 1	29894	-0.317163	0.00162095	0.260906
ILMN_1651699	12	12p12.3	EPS8	epidermal growth factor receptor pathway substrate 8	2059	-0.317553	0.0334759	0.527956
ILMN_1801853	12	12q14.2	DPY19L2	dpy-19 like 2	283417	-0.317583	0.0258884	0.48918
ILMN_1696590	16	16q22.2	CHST4	carbohydrate sulfotransferase 4	10164	-0.318349	0.0170293	0.455716
ILMN_1692160	6	6p23	GFOD1	glucose-fructose oxidoreductase domain containing 1	54438	-0.319332	0.0083848	0.376219
ILMN_1740413	X	Xp11.21	USP51	ubiquitin specific peptidase 51	158880	-0.319577	0.0415129	0.553227
ILMN_1727076	19	19p13.12	OR10H4	olfactory receptor family 10 subfamily H member 4	126541	-0.319761	0.0286894	0.503914
ILMN_2360054	6	6p21.33	DDR1	discoidin domain receptor tyrosine kinase 1	780	-0.319859	0.00206448	0.269374
ILMN_2100693	17	17p12	MAP2K4	mitogen-activated protein kinase kinase 4	6416	-0.31988	0.00627501	0.343942
ILMN_1702858	8	8q13.1	ADHFE1	alcohol dehydrogenase iron containing 1	137872	-0.319936	0.0141926	0.437852
ILMN_2058347	6	6q22.1	NT5DC1	5'-nucleotidase domain containing 1	221294	-0.320062	0.0351001	0.533735
ILMN_3236097	19	19q13.33	SNORD88B	small nucleolar RNA, C/D box 88B	692203	-0.320097	0.000908513	0.208813
ILMN_1653026	4	4q21.22	PLAC8	placenta associated 8	51316	-0.320206	0.00334509	0.299546
ILMN_1716651	6	6p21.1	RUNX2	RUNX family transcription factor 2	860	-0.320289	0.00439424	0.318342
ILMN_3307714	12	12p13.1	GRIN2B	glutamate ionotropic receptor NMDA type subunit 2B	2904	-0.320424	0.00966783	0.388907
ILMN_1789575	1	1p34.3	GJB3	gap junction protein beta 3	2707	-0.320718	0.0238257	0.478788
ILMN_2054607	4	4q35.1-q35.2	CYP4V2	cytochrome P450 family 4 subfamily V member 2	285440	-0.320887	0.0423222	0.553688
ILMN_1686237	17	17q25.3	CBX2	chromobox 2	84733	-0.321231	0.0199044	0.461483
ILMN_1687947	6	6p22.2	H2BC6	H2B clustered histone 6	8344	-0.32134	0.037222	0.540568
ILMN_2077504	21	21q21.3	LTN1	listerin E3 ubiquitin protein ligase 1	26046	-0.321446	0.0105892	0.393813
ILMN_1781980	2	2q21.1	CFC1B	cripto, FRL-1, cryptic family 1B	653275	-0.321881	0.0425755	0.554449
ILMN_2068104	7	7q21.3	TFPI2	tissue factor pathway inhibitor 2	7980	-0.32209	0.01151	0.408669
ILMN_1682567	19	19q13.42	CCDC106	coiled-coil domain containing 106	29903	-0.322148	0.00782718	0.374271
ILMN_2043828	8	8q24.11	UTP23	UTP23 small subunit processome component	84294	-0.322567	0.0355177	0.535588
ILMN_1655426	19	19q13.33	KLK3	kallikrein related peptidase 3	354	-0.323544	0.03114	0.516448
ILMN_2191568	3	3p21.31	NPRL2	NPR2 like, GATOR1 complex subunit	10641	-0.323567	0.011155	0.40144
ILMN_2184556	4	4q13.3	SLC4A4	solute carrier family 4 member 4	8671	-0.323749	0.00605295	0.342083
ILMN_1754241	16	16p13.3	MEIOB	meiosis specific with OB-fold	254528	-0.323751	0.0131482	0.427299
ILMN_1681628	7	7q31.1	ZNF277	zinc finger protein 277	11179	-0.324316	0.0284266	0.503914
ILMN_2357155	2	2p25.3	TPO	thyroid peroxidase	7173	-0.324635	0.00970123	0.388907
ILMN_1697268	18	18p11.32-p11.31	EMILIN2	elastin microfibril interfacer 2	84034	-0.324961	0.00489242	0.327953
ILMN_3310920	10	10q26.3	MIR202	microRNA 202	574448	-0.325002	0.0253156	0.486422
ILMN_2090641	2	2p25.3	FAM110C	family with sequence similarity 110 member C	642273	-0.325311	0.0194532	0.459175
ILMN_1758623	6	6p22.2	H2BC5	H2B clustered histone 5	3017	-0.325723	0.0159712	0.449686
ILMN_1746025	3	3q11.2	RIOX2	ribosomal oxygenase 2	84864	-0.325855	0.0131135	0.427299
ILMN_1755222	9	9p21.2	CAAP1	caspase activity and apoptosis inhibitor 1	79886	-0.325873	0.0357082	0.535588
ILMN_2057220	8	8q22.2	RIDA	reactive intermediate imine deaminase A homolog	10247	-0.325876	0.0187364	0.459175
ILMN_1788095	12	12q13.13	SPRYD3	SPRY domain containing 3	84926	-0.326242	0.00413097	0.317908
ILMN_1689400	2	2q33.1	CLK1	CDC like kinase 1	1195	-0.32652	0.00730288	0.361934
[truncated: 442 more rows]
